# Supplementary material for: A revised map of volcanic units in the Oman ophiolite: insights into the architecture of an oceanic proto-arc volcanic sequence
Source: Copernicus journal article supplement (doi:10.5194/se-2019-69), 2019-04-18
Supplement: Supplementary file 1 [file se-2019-69-supplement.zip]

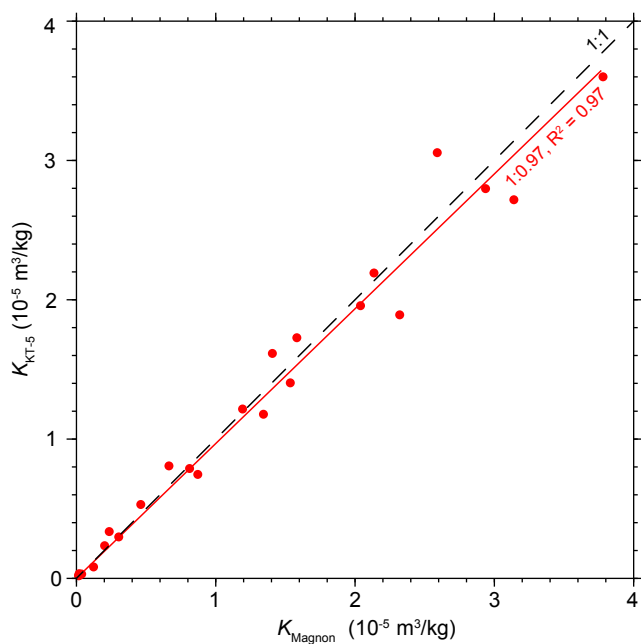

Figure S1. Magnetic susceptibility measured by an Exploranium™ KT-5 handheld kappameter and a desktop Magnon™ kappameter for the same samples. Linear regression through data (red line) indicates reasonable comparability between datasets.

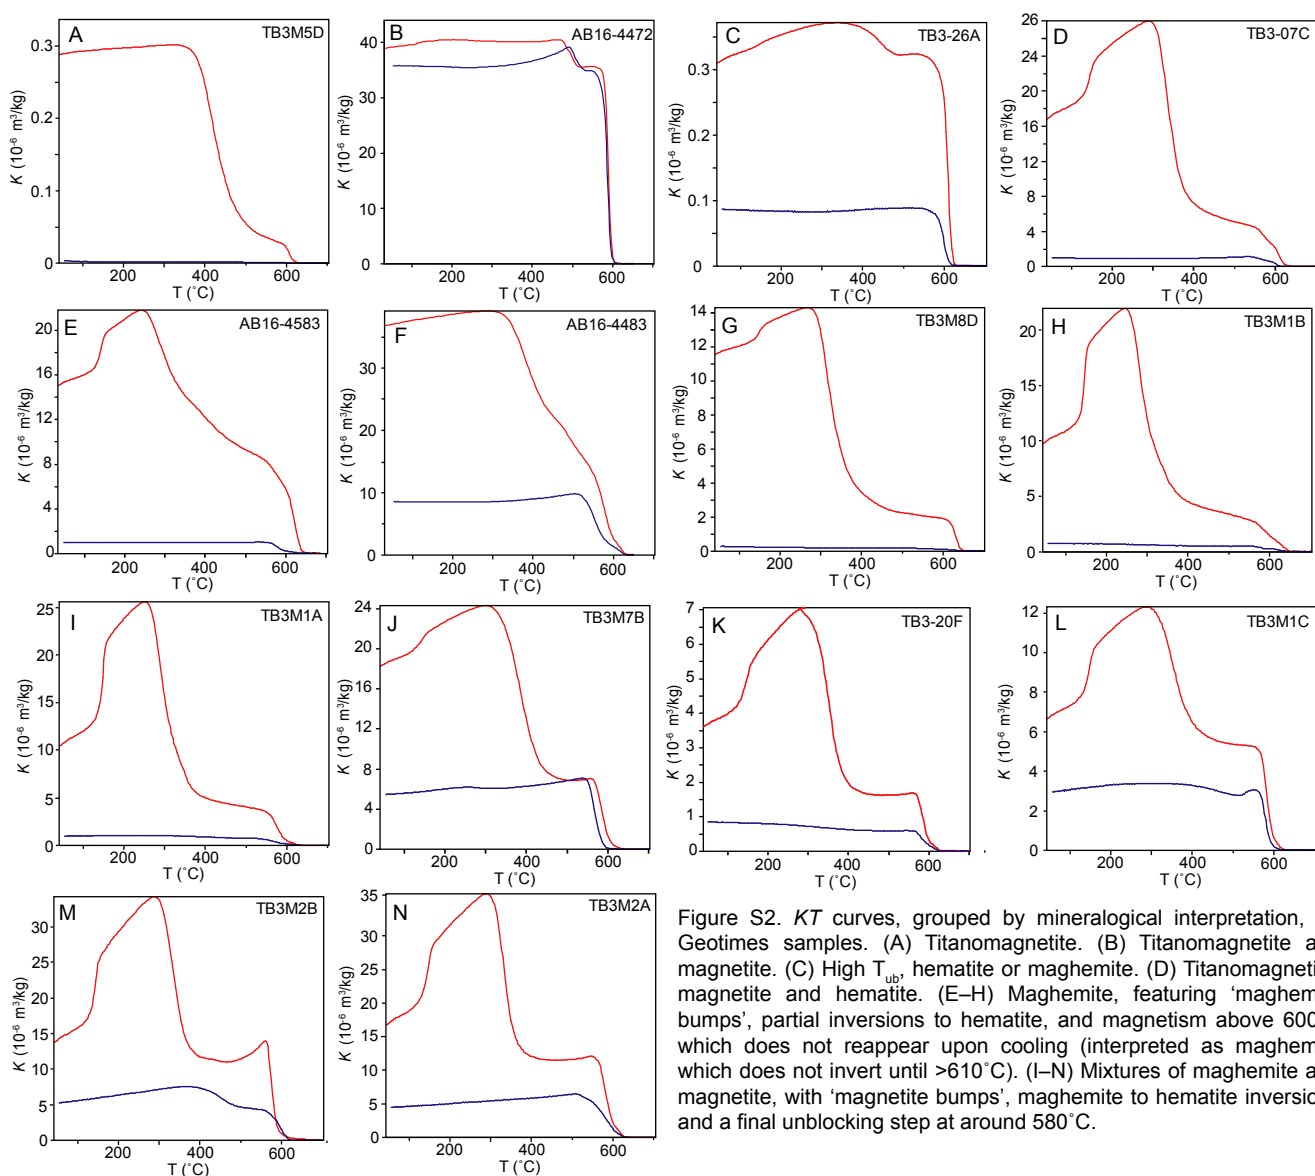

Figure S2. KT curves, grouped by mineralogical interpretation, for Geotimes samples. (A) Titanomagnetite. (B) Titanomagnetite and magnetite. (C) High  $T_{ub}$ , hematite or maghemite. (D) Titanomagnetite, magnetite and hematite. (E–H) Maghemite, featuring 'maghemite bumps', partial inversions to hematite, and magnetism above 600°C which does not reappear upon cooling (interpreted as maghemite which does not invert until >610°C). (I–N) Mixtures of maghemite and magnetite, with 'magnetite bumps', maghemite to hematite inversions and a final unblocking step at around 580°C.

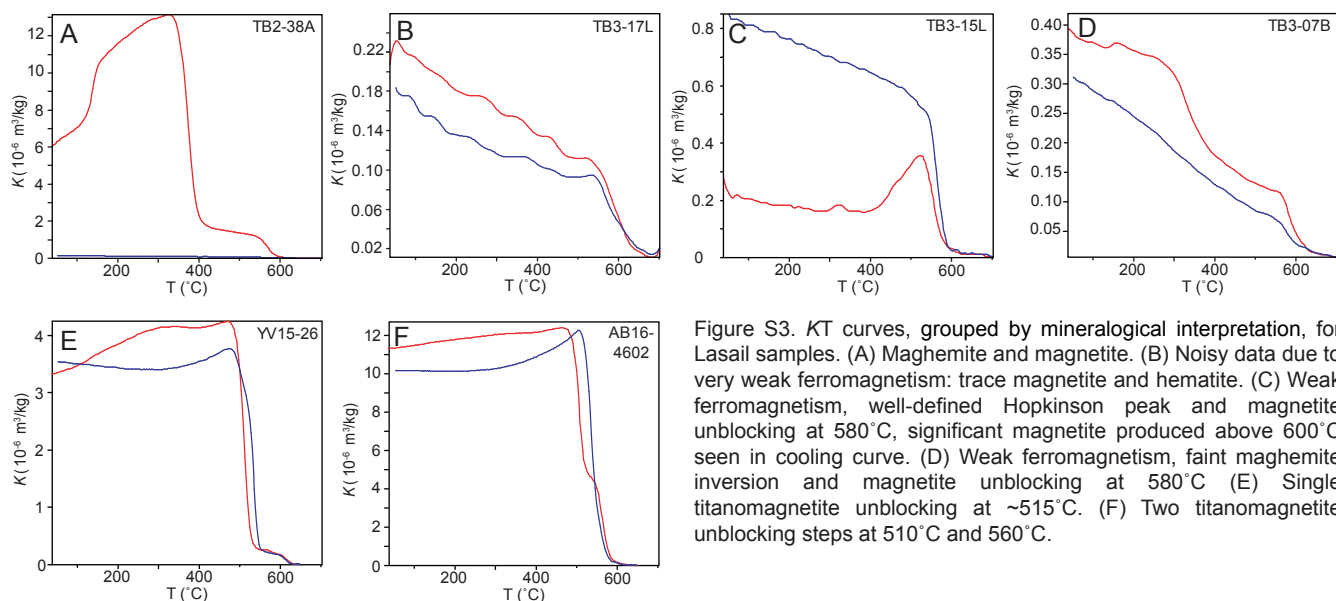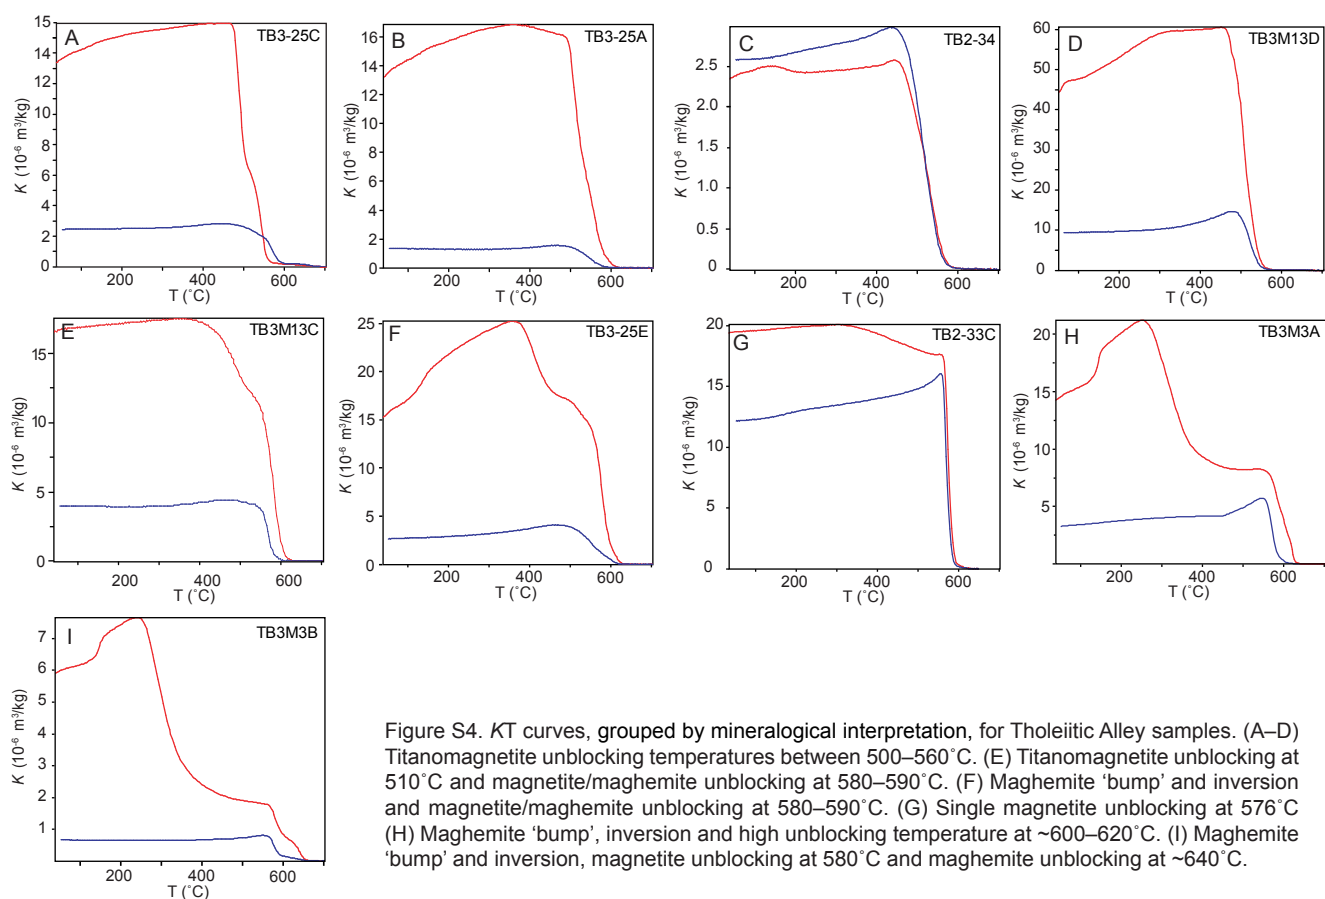

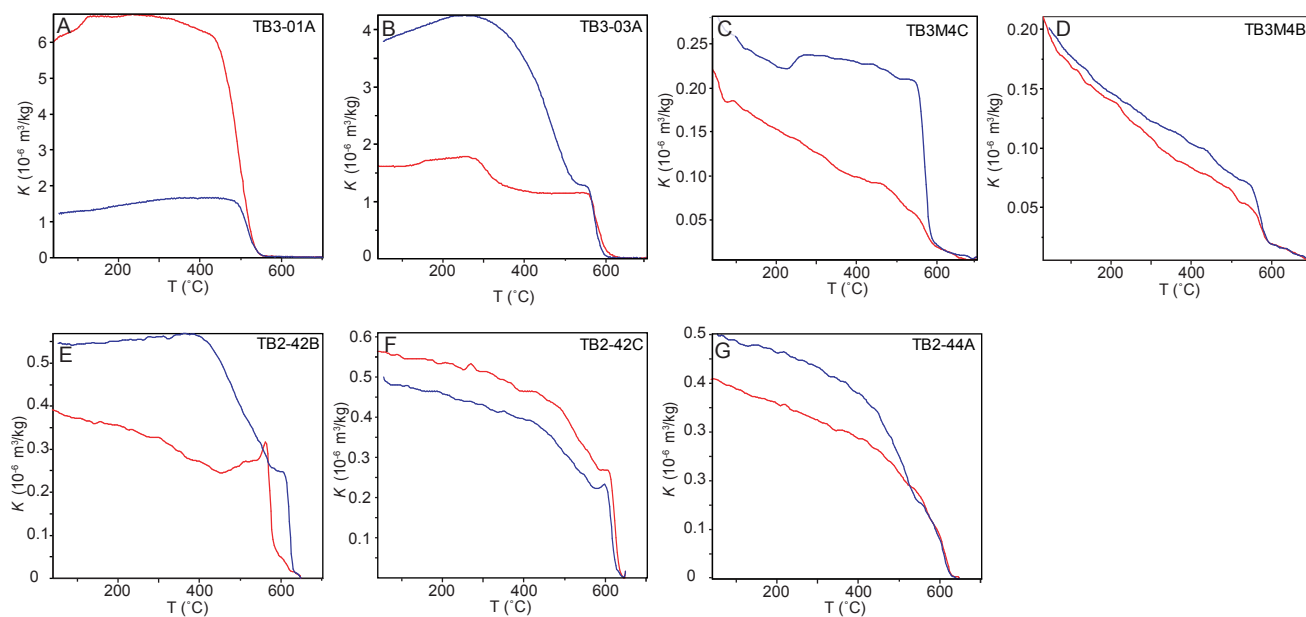

Figure S5. KT curves, grouped by mineralogical interpretation, for Boninitic Alley samples. (A) Titanomagnetite unblocking temperatures between 510 $^{\circ}\text{C}$ . (B) Slight maghemite 'bump' and inversion and magnetite unblocking at 580 $^{\circ}\text{C}$ . (C–E) Noisy, mostly paramagnetic signal with magnetite unblocking at 580 $^{\circ}\text{C}$  and some artificial magnetite production above 600 $^{\circ}\text{C}$  (F) Noisy, slightly paramagnetic signal with maghemite/hematite unblocking at ~630 $^{\circ}\text{C}$  (G) Mostly paramagnetic signal with a gradual drop in  $K$  between 500–630 $^{\circ}\text{C}$  (titanomagnetite, magnetite, maghemite/hematite)

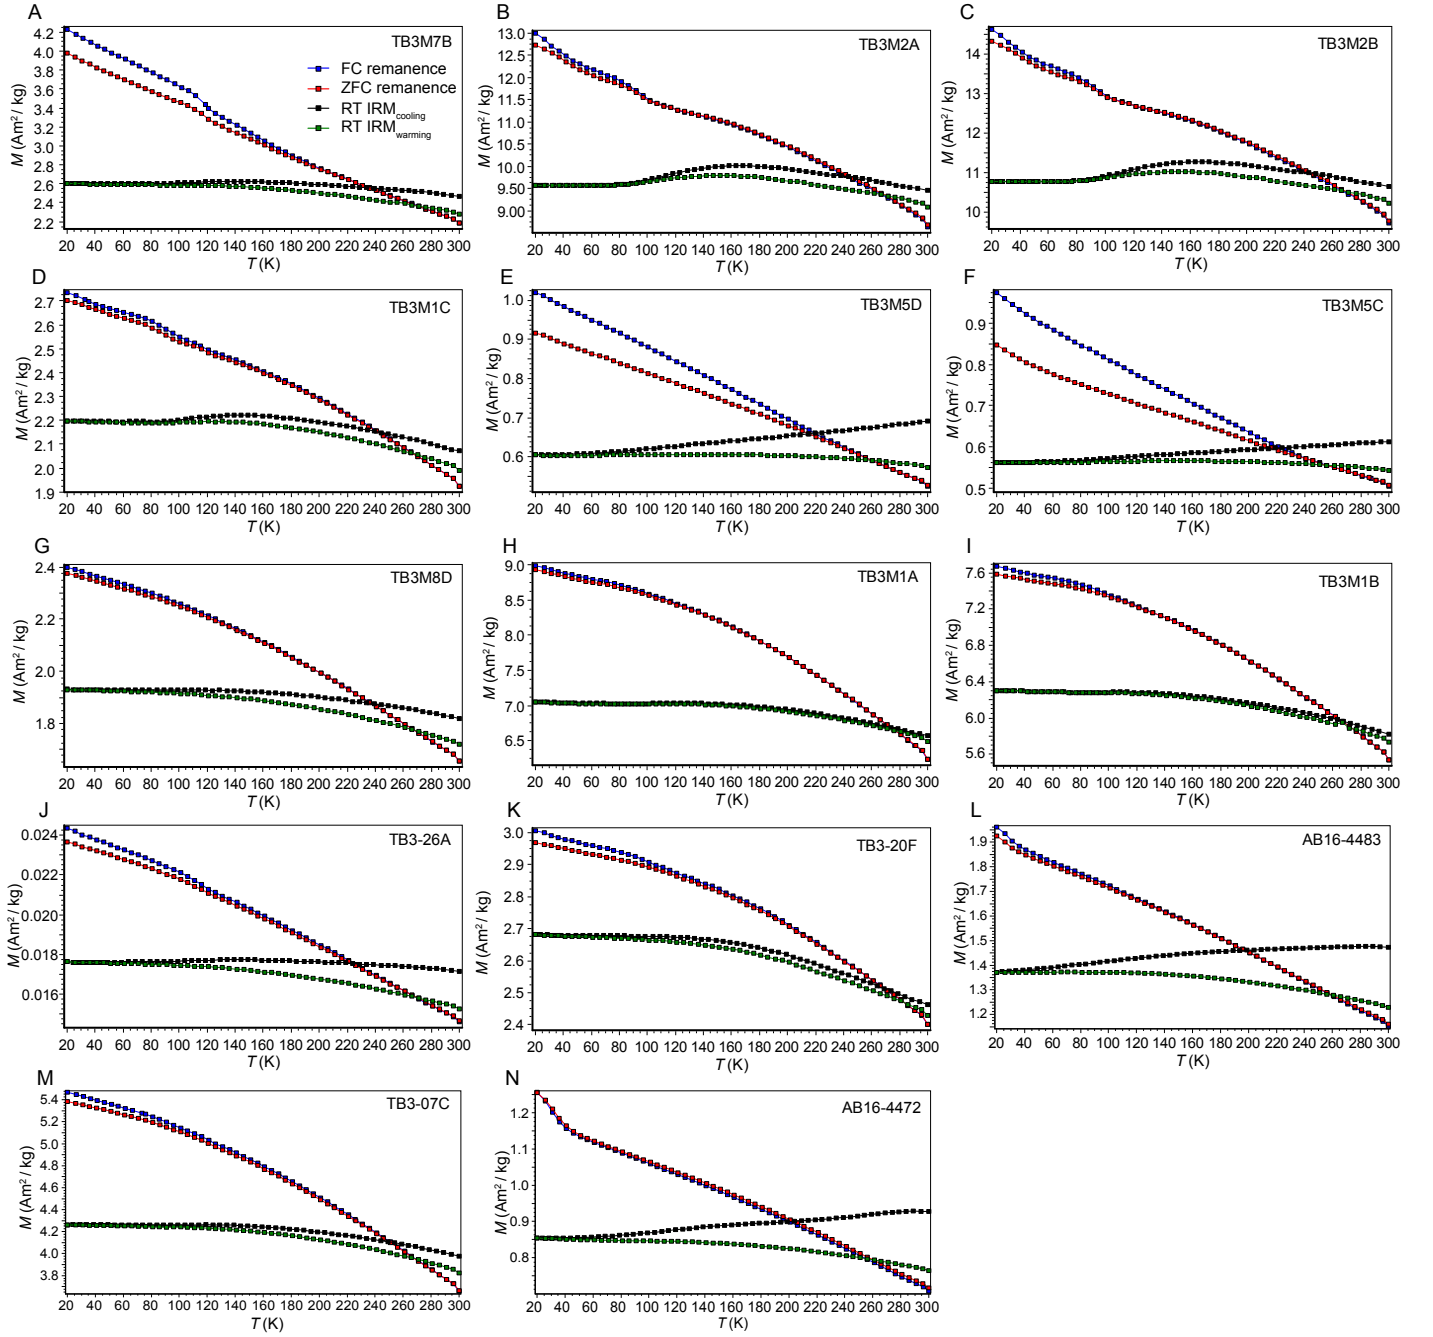

Figure S6. Low-temperature FC and ZFC remanences and RT-IRM during cooling and warming, grouped by mineralogical interpretation, for Geotimes samples. (A–D): Geotimes with a weak Verwey transition at 100–120 K, indicating trace- or partially oxidized presence of stoichiometric magnetite. (E–N) Geotimes without a detectable Verwey transition due to oxidation or Ti substitution in magnetite, or a Besnus transition (30–35 K) suggesting an absence of monoclinic pyrrhotite.

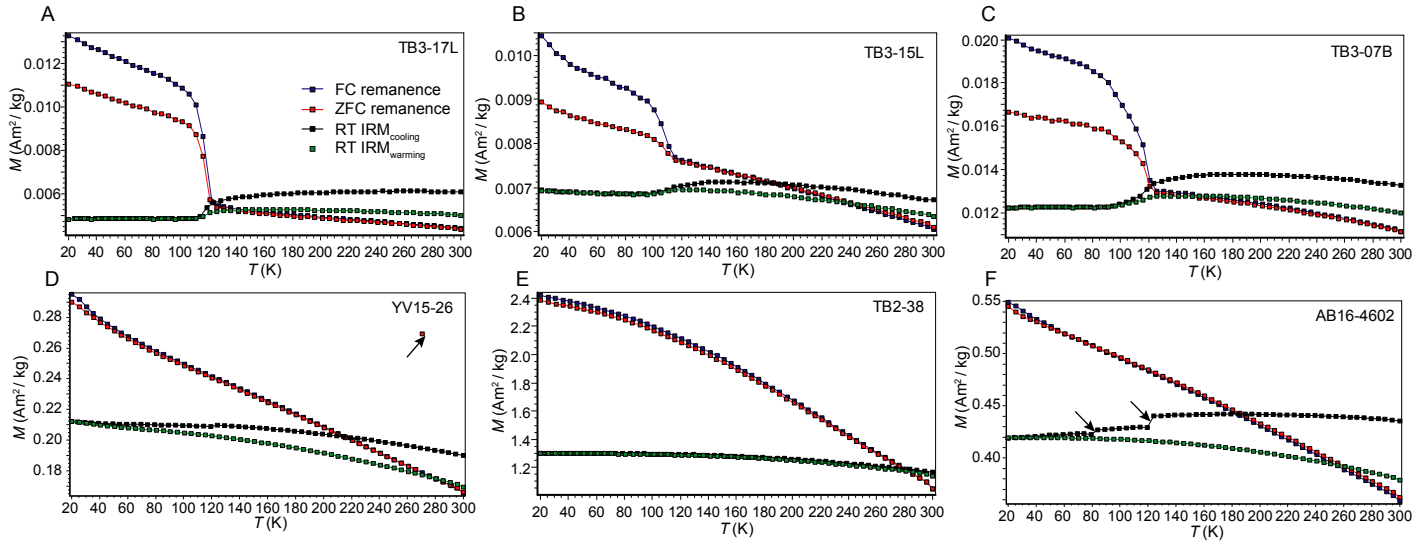

Figure S7. Low-temperature FC and ZFC remanences and RT-IRM during cooling and warming, grouped by mineralogical interpretation, for Lasail samples. (A–C): Lasail samples with a Verwey transition at 100–120 K, indicating the presence of stoichiometric magnetite. (D–F) Lasail without a detectable Verwey transition, either due to oxidation or Ti substitution in magnetite. Arrows point to outliers and artefacts likely introduced by movement of the sample during measurement

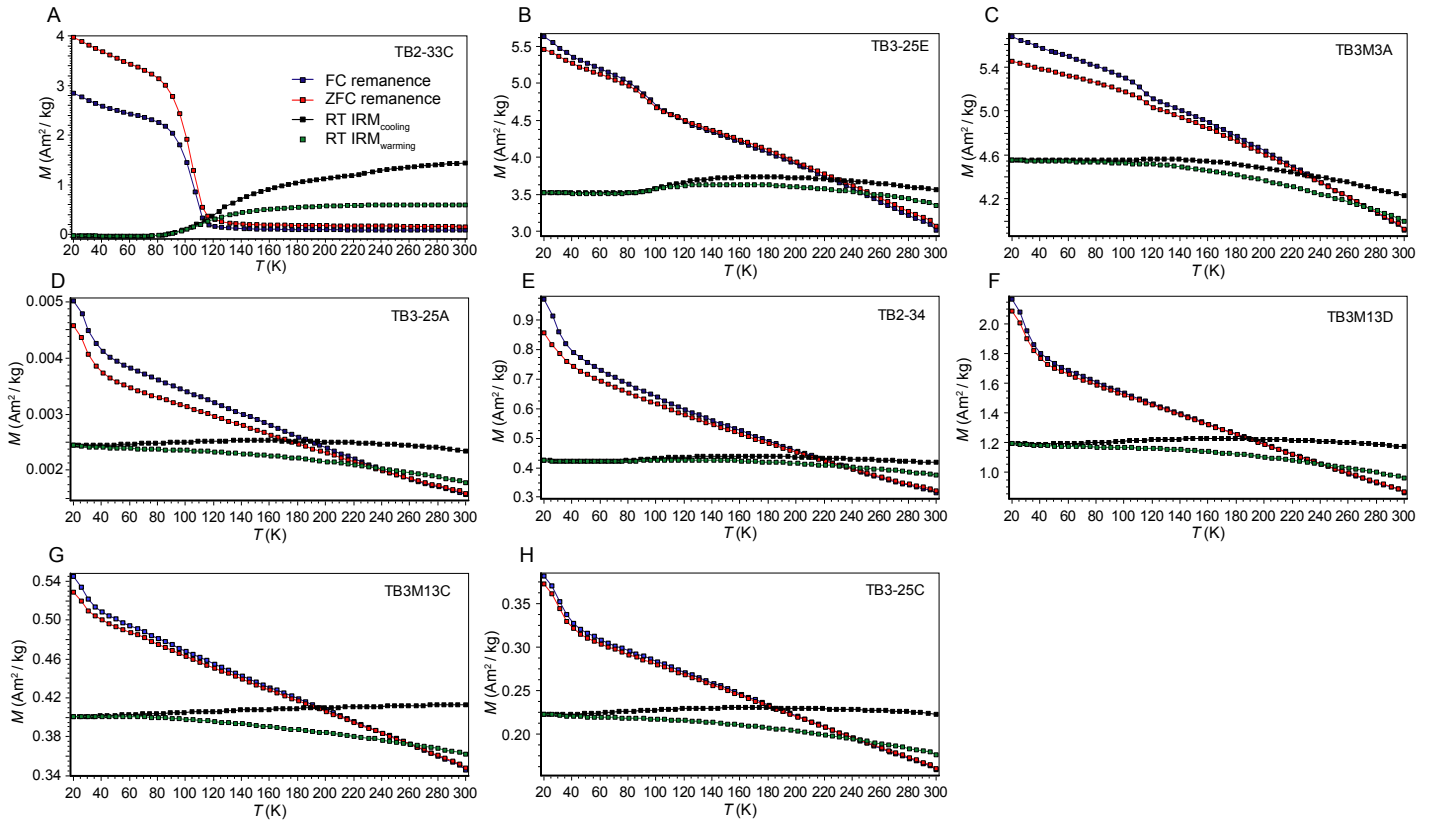

Figure S8. Low-temperature FC and ZFC remanences and RT-IRM during cooling and warming, grouped by mineralogical interpretation, for Tholeiitic Alley samples. (A–C): Tholeiitic Alley with a Verwey transition at 100–120 K, indicating the presence of stoichiometric magnetite. (D–H) Tholeiitic Alley samples without a detectable Verwey transition, either due to oxidation or Ti substitution in magnetite.

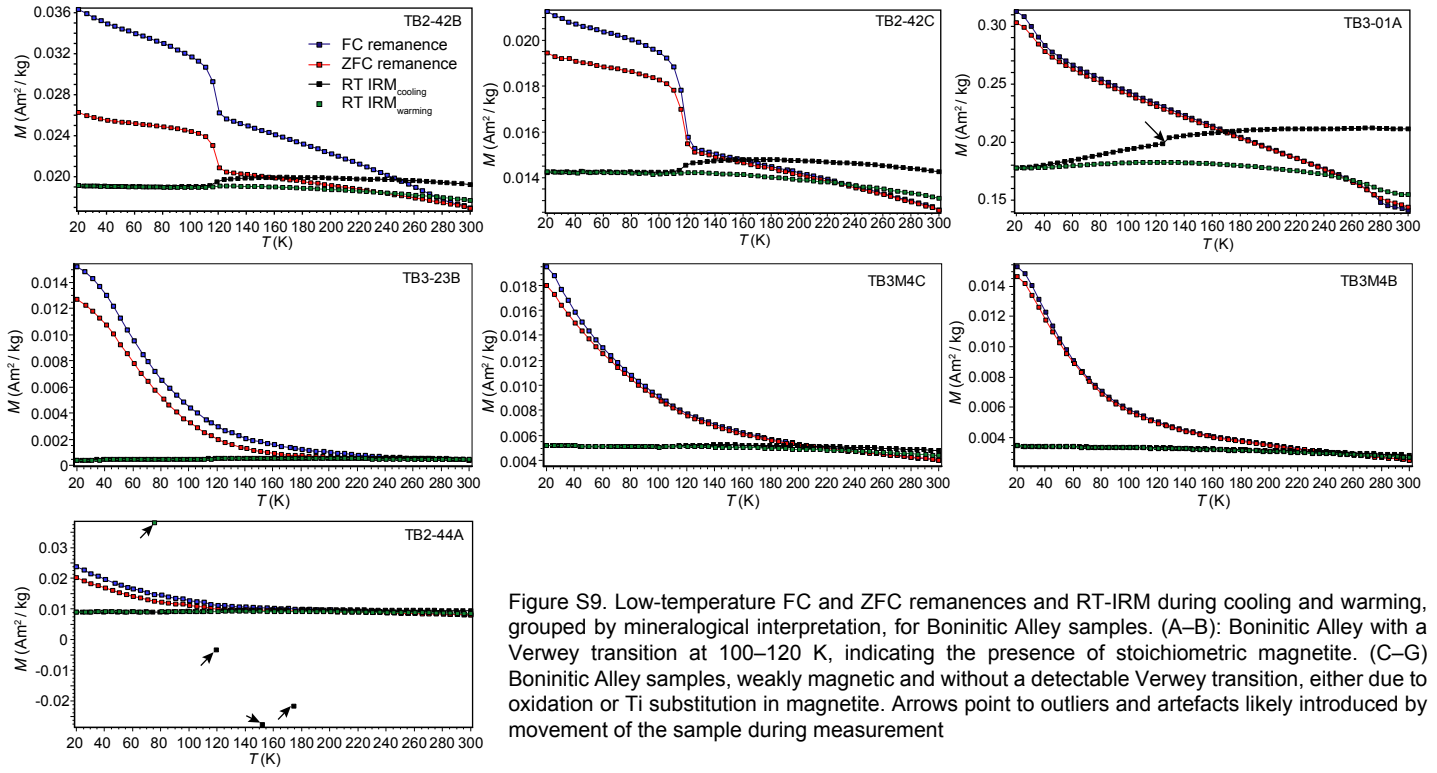

Figure S9. Low-temperature FC and ZFC remanences and RT-IRM during cooling and warming, grouped by mineralogical interpretation, for Boninitic Alloy samples. (A–B): Boninitic Alloy with a Verwey transition at 100–120 K, indicating the presence of stoichiometric magnetite. (C–G) Boninitic Alloy samples, weakly magnetic and without a detectable Verwey transition, either due to oxidation or Ti substitution in magnetite. Arrows point to outliers and artefacts likely introduced by movement of the sample during measurement

Table S1: Volcanic unit assignments of samples indicated by field observations and diagrams in Fig. 5 of text.

| Sample     | Field character | Ti vs. Zr | Ti vs. V | Cr vs. Y | Zr vs. Zr/Y | Cpx Mg# vs. Ti | Assigned Lava Unit |
|------------|-----------------|-----------|----------|----------|-------------|----------------|--------------------|
| LD10-145/6 | —               | bA        | —        | La/bA    | La/bA       | —              | <b>bA</b>          |
| LD10-146/4 | —               | bA        | La/bA    | La/bA    | La/tA       | —              | <b>bA</b>          |
| SG14-28    | La/bA           | bA        | bA       | La/bA    | bA/La       | —              | <b>bA</b>          |
| SG14-29    | La/bA           | bA        | bA       | La/bA    | bA          | —              | <b>bA</b>          |
| SP18-B7    | tA              | La/tA/bA  | bA       | La/bA    | La/tA       | —              | <b>bA</b>          |
| SP18-D2    | tA/bA           | bA        | bA       | bA       | bA          | —              | <b>bA</b>          |
| TB2-19A    | bA              | La/tA/bA  | La/bA    | bA       | La/tA/bA    | —              | <b>bA</b>          |
| TB4-09B    | bA              | La/tA/bA  | La/bA    | bA/La    | La/bA       | —              | <b>bA</b>          |
| TB4-10A    | La/bA           | bA        | bA       | bA       | bA          | —              | <b>bA</b>          |
| TB4-10B    | tA/bA           | bA        | bA       | La/A/bA  | bA          | —              | <b>bA</b>          |
| TB4-17I    | bA              | bA        | bA       | bA       | bA          | —              | <b>bA</b>          |
| TB4-18H    | La/bA           | La/tA/bA  | bA       | La/bA    | La/bA       | —              | <b>bA</b>          |
| TB4-19G    | bA              | bA        | bA       | bA       | La/bA       | —              | <b>bA</b>          |
| TB4-23A    | tA              | bA        | bA       | La/bA    | La/bA       | —              | <b>bA</b>          |
| AB16-4613  | La/bA           | La/tA/bA  | bA       | La/tA/bA | bA          | La/tA/bA       | <b>bA</b>          |
| TB2-27A    | La/bA           | bA        | bA       | bA       | La/bA       | —              | <b>bA</b>          |
| TB2-42A    | La/bA           | La/bA     | bA       | bA/La    | La/bA       | bA             | <b>bA</b>          |
| TB2-45b    | tA/bA           | La/tA/bA  | bA       | bA/La/A  | La/tA/bA    | tA/bA          | <b>bA</b>          |
| TB4-05D    | La/bA           | bA        | bA       | bA/La    | bA          | —              | <b>bA</b>          |
| AB16-4550  | La/bA           | bA        | bA       | La/bA    | La/bA       | —              | <b>bA</b>          |
| TB2-21A    | tA/bA           | La/tA/bA  | bA       | bA/La    | bA          | —              | <b>bA</b>          |
| TB2-42b    | La/bA           | bA        | bA       | bA/La    | bA          | bA             | <b>bA</b>          |
| TB2-42c    | La/bA           | bA        | bA       | bA/La    | La/bA       | bA             | <b>bA</b>          |
| TB2-44A    | La/bA           | bA        | bA       | bA/La    | bA          | bA             | <b>bA</b>          |
| TB3-01A    | tA/bA           | bA        | bA       | bA       | bA          | bA             | <b>bA</b>          |
| TB3-03A    | —               | La/tA/bA  | bA       | bA/La/A  | La/tA/bA    | —              | <b>bA</b>          |
| TB3-19C    | bA              | La/tA/bA  | bA       | bA/La    | La/bA       | —              | <b>bA</b>          |
| TB3-23B    | bA              | bA        | bA       | bA       | bA          | —              | <b>bA</b>          |
| LD10-146/1 | —               | bA        | —        | bA       | bA          | La/bA          | <b>bA</b>          |
| RaM-005    | La/tA/bA        | La/bA     | La/bA    | bA/La    | bA          | —              | <b>dL</b>          |
| TB2-40d    | La/bA           | La/bA     | bA       | bA/La    | bA          | La             | <b>dL</b>          |
| LD10-1251  | tA              | fA        | —        | —        | Gt/tA       | tA             | <b>fA</b>          |
| SP18-A8    | tA              | fA        | —        | —        | Gt/tA       | —              | <b>fA</b>          |
| TB3-13B    | —               | fA        | —        | —        | Gt/tA       | —              | <b>fA</b>          |
| TB2-32A    | Gt              | fA        | —        | —        | Gt/tA       | —              | <b>fA</b>          |
| TB2-34A    | tA              | fA        | —        | —        | Gt/tA       | —              | <b>fA</b>          |
| TB3-25A    | Gt              | fA        | —        | —        | Gt/tA       | —              | <b>fA</b>          |
| TB3-25C    | tA              | fA        | —        | —        | Gt/tA       | —              | <b>fA</b>          |
| TB3-25E    | Gt/tA           | fA        | —        | —        | Gt/tA       | —              | <b>fA</b>          |
| TB3-06A    | Gt/tA           | fG        | Gt       | —        | Gt          | —              | <b>fG</b>          |
| TB3-10D    | Gt/tA           | fG        | —        | —        | Gt          | —              | <b>fG</b>          |
| TB4-06B    | Gt              | fG        | Gt       | Gt       | Gt          | —              | <b>fG</b>          |
| TB4-23C    | fA              | fG        | —        | —        | Gt          | —              | <b>fG</b>          |
| TB2-50c    | —               | fG        | Gt       | —        | Gt          | —              | <b>fG</b>          |
| RaM-004    | Gt/tA           | Gt        | Gt       | Gt       | Gt/La/tA    | —              | <b>Gt</b>          |
| SG13-36A   | Gt              | Gt/La/tA  | Gt/La/tA | Gt/tA    | Gt/La/tA    | —              | <b>Gt</b>          |
| SG14-44    | Gt              | Gt/La/tA  | Gt/tA    | Gt       | Gt/tA       | —              | <b>Gt</b>          |
| SG14-57    | Gt              | Gt        | Gt       | Gt       | Gt          | —              | <b>Gt</b>          |
| SP18-A1    | Gt              | Gt/tA     | Gt/La/tA | —        | Gt/La/tA    | —              | <b>Gt</b>          |
| SP18-A3    | Gt/tA           | Gt        | Gt       | —        | Gt          | —              | <b>Gt</b>          |
| SP18-B3    | Gt              | Gt        | Gt       | Gt       | Gt/tA       | —              | <b>Gt</b>          |
| SP18-B5    | Gt              | Gt        | Gt       | —        | Gt          | —              | <b>Gt</b>          |
| SP18-C5p   | Gt              | Gt        | Gt       | —        | Gt          | —              | <b>Gt</b>          |
| SP18-D11   | Gt/tA           | Gt        | Gt       | Gt       | Gt/tA       | —              | <b>Gt</b>          |
| SP18-D9    | Gt/tA           | Gt        | Gt       | Gt       | Gt          | —              | <b>Gt</b>          |
| TB3-05B    | Gt              | Gt        | Gt       | Gt       | Gt/La/tA    | —              | <b>Gt</b>          |

Table S1 continued.

| Sample    | Field character | Ti vs. Zr | Ti vs. V | Cr vs. Y | Zr vs. Zr/Y | Cpx Mg# vs. Ti | Assigned Lava Unit |
|-----------|-----------------|-----------|----------|----------|-------------|----------------|--------------------|
| TB3-05C   | —               | Gt        | Gt       | Gt       | Gt/tA       | —              | Gt                 |
| TB3-05D   | Gt              | Gt        | Gt       | Gt       | Gt/La       | —              | Gt                 |
| TB3-07A2  | tA              | Gt        | Gt       | —        | Gt/La       | —              | Gt                 |
| TB3-08A   | La              | Gt/tA     | Gt       | Gt       | Gt/La/tA    | —              | Gt                 |
| TB3-11F   | tA              | Gt        | Gt       | Gt       | Gt/La       | —              | Gt                 |
| TB3-14B   | Gt              | Gt/La/tA  | Gt       | —        | Gt/La       | —              | Gt                 |
| TB4-17C   | tA/bA           | Gt/La/tA  | Gt/La    | Gt       | Gt/La/tA    | —              | Gt                 |
| TB4-18F   | Gt/tA           | La/tA     | Gt/La/tA | Gt       | La/tA       | —              | Gt                 |
| TB4-19C   | Gt/tA           | Gt        | Gt       | Gt/A     | Gt/La       | —              | Gt                 |
| WF-007    | —               | Gt/La/tA  | —        | Gt       | —           | —              | Gt                 |
| WF-009    | Gt              | Gt/tA     | Gt       | Gt       | Gt/La/tA    | —              | Gt                 |
| YV15-04   | Gt/tA           | Gt/tA     | Gt/tA    | —        | Gt/tA       | —              | Gt                 |
| YV15-15   | Gt              | Gt        | Gt       | —        | Gt          | Gt             | Gt                 |
| AB16-4511 | —               | Gt/tA     | Gt       | Gt/tA    | Gt/La/tA    | Gt             | Gt                 |
| AB16-4512 | —               | La/tA     | Gt/La/tA | Gt       | La/tA       | —              | Gt                 |
| AB16-4521 | Gt              | Gt/La/tA  | Gt       | Gt       | Gt/La/tA    | Gt             | Gt                 |
| AB16-4571 | —               | Gt        | Gt       | Gt       | Gt/La       | Gt             | Gt                 |
| AB16-4592 | Gt/La           | Gt        | Gt       | Gt       | Gt/La/tA    | Gt             | Gt                 |
| AB16-4593 | Gt              | Gt        | Gt       | Gt       | Gt/La       | —              | Gt                 |
| AB16-4671 | Gt              | Gt        | Gt       | —        | Gt/La       | —              | Gt                 |
| LD10-1204 | Gt              | Gt        | Gt       | —        | Gt/A        | —              | Gt                 |
| LD10-1231 | tA              | Gt        | Gt       | Gt       | Gt/La       | Gt             | Gt                 |
| LD10-1241 | tA              | Gt        | Gt       | —        | Gt/La       | —              | Gt                 |
| TB2-32b   | —               | Gt        | Gt       | Gt       | Gt          | —              | Gt                 |
| TB2-39c   | La              | Gt        | Gt       | —        | Gt/tA       | Gt/tA          | Gt                 |
| TB2-45c   | Gt              | Gt        | Gt       | —        | Gt/tA       | Gt             | Gt                 |
| TB4-06C   | Gt              | Gt        | Gt       | —        | Gt          | —              | Gt                 |
| TB4-15B   | Gt              | Gt        | Gt       | Gt       | Gt          | —              | Gt                 |
| TB4-18B   | Gt/tA           | Gt        | Gt       | —        | Gt          | —              | Gt                 |
| TB4-20C   | Gt/tA           | Gt/tA     | Gt       | —        | Gt/tA       | —              | Gt                 |
| TB4-20N   | Gt              | Gt        | Gt       | Gt       | Gt/tA       | —              | Gt                 |
| AB16-4472 | Gt              | Gt        | Gt       | —        | Gt/tA       | Gt             | Gt                 |
| AB16-4483 | Gt              | Gt        | Gt       | —        | Gt/tA       | Gt             | Gt                 |
| AB16-4492 | —               | Gt        | Gt       | Gt       | Gt/tLa      | —              | Gt                 |
| AB16-4583 | Gt              | Gt/tA     | Gt       | Gt       | Gt/La/tA    | —              | Gt                 |
| TB2-40b   | —               | Gt/La/tA  | Gt       | Gt       | La/tA       | Gt             | Gt                 |
| TB3-20C   | Gt/tA           | Gt/A      | Gt       | Gt       | Gt/La/tA    | —              | Gt                 |
| TB3-20D   | Gt              | Gt/A      | Gt/La    | Gt       | La/tA       | —              | Gt                 |
| TB3-20I   | Gt/tA           | Gt        | Gt       | Gt       | Gt          | —              | Gt                 |
| TB3-26A   | Gt              | Gt        | Gt       | —        | Gt/La/tA    | —              | Gt                 |
| TB3M8D    | Gt/La           | Gt/La/tA  | Gt/tA    | Gt/A     | Gt/La/tA    | —              | Gt                 |
| SW16-23   | —               | Gt/La/tA  | Gt/La/tA | —        | Gt/La/tA    | —              | Gt–La              |
| YV15-02   | Gt/tA           | Gt/tA     | Gt       | La/tA    | Gt/La/tA    | —              | Gt–La              |
| TB2-39b   | La              | La/tA     | Gt/La/tA | Gt/La/tA | La/tA       | Gt/La          | Gt–La              |
| TB2-40    | Gt/tA           | La/tA     | Gt/La    | Gt/La/tA | La/tA       | —              | Gt–La              |
| YV15-14   | —               | Gt/La/tA  | Gt/La/tA | Gt       | Gt/La/tA    | La             | Gt–La              |
| TB4-17F   | La/bA/tA        | La/tA     | La/tA    | La/bA    | La/tA/bA    | —              | La                 |
| RaM-002   | La              | La/tA     | La/tA    | La/tA    | La/tA       | —              | La                 |
| TB3-08B   | La              | La/tA     | La/tA    | La/tA/bA | La/tA/bA    | La             | La                 |
| TB3-19B   | La              | Gt/La/tA  | La/tA    | La/tA    | La/tA       | La             | La                 |
| TB4-10D   | La/bA           | Gt/La/tA  | Gt/La    | Gt/A/La  | La/tA       | —              | La                 |
| YV15-08   | La/bA           | Gt/La/tA  | La/tA    | Gt/A/La  | Gt/La/tA    | La             | La                 |
| YV15-17   | —               | La/tA     | —        | La/tA    | Gt/La/tA    | —              | La                 |
| YV15-22   | La              | La/tA     | La/tA    | La/tA    | La/tA       | —              | La                 |
| AB16-4601 | La              | La/tA     | La/tA    | La       | La/tA       | —              | La                 |
| LD10-1211 | La              | La/tA     | La/tA    | La/tA    | La/tA       | La             | La                 |



Table S1 continued.

| Sample    | Field character | Ti vs. Zr | Ti vs. V | Cr vs. Y | Zr vs. Zr/Y | Cpx Mg# vs. Ti | Assigned Lava Unit |
|-----------|-----------------|-----------|----------|----------|-------------|----------------|--------------------|
| TB2-33A   | –               | La/tA     | La/tA    | La/tA    | La/tA       | La/bA          | La                 |
| TB2-35c   | La              | Gt/La/tA  | La/tA    | La/tA    | Gt/La/tA    | La             | La                 |
| TB2-39A   | La              | La/tA     | La/tA    | La/tA    | La/tA       | La             | La                 |
| AB16-4602 | La              | La/tA     | La/tA    | Gt/La/tA | La/tA       | La             | La                 |
| LD10-1221 | La              | La/tA     | –        | La/tA    | La/tA       | La             | La                 |
| TB2-38    | –               | La/tA     | La/tA    | La/tA    | La/tA       | La             | La                 |
| TB3-15L   | La              | La/tA     | La/tA    | Gt/La/tA | La/tA       | La             | La                 |
| TB3-17L   | La              | La/tA/bA  | La/bA    | La/tA/bA | La/tA/bA    | La             | La                 |
| YV15-26   | La              | La/tA     | La/tA    | La/tA    | La/tA       | La             | La                 |
| TB3-09B   | La              | Gt/La/tA  | La/tA    | La/tA    | La/tA       | –              | La                 |
| SP18-A9   | tA/bA           | La/tA     | La/tA    | La/tA    | La/tA       | bA             | T-A                |
| WR-004    | La/bA           | T-A       | –        | La/tA    | La/tA       | –              | T-A                |
| TB4-19A   | tA/bA           | La/tA/bA  | La/tA/bA | La/bA    | La/tA/bA    | –              | T-A                |
| TB3-15C   | tA/bA           | T-A       | –        | La/tA/bA | La/tA       | –              | T-A                |
| SP18-B9   | tA              | La/tA     | tA       | Gt/tA    | tA          | –              | tA                 |
| SP18-C13  | tA              | La/tA     | La/tA    | Gt/La/tA | La/tA       | –              | tA                 |
| SP18-C16  | tA              | La/tA     | La/tA    | La/tA    | La/tA       | –              | tA                 |
| SP18-C7   | tA              | Gt/La/tA  | La/tA    | –        | Gt/La/tA    | –              | tA                 |
| SP18-C8   | tA              | La/tA     | La/tA    | La/tA    | La/tA       | –              | tA                 |
| SP18-D3   | tA              | La/tA     | La/tA    | La/tA    | La/tA       | –              | tA                 |
| SP18-D5   | tA              | La/tA     | La/tA    | La/tA    | La/tA       | –              | tA                 |
| TB3-10A   | tA              | La/tA     | tA       | tA       | La/bA       | –              | tA                 |
| TB3-10C   | Gt/tA           | Gt/La/tA  | tA       | –        | La/tA       | –              | tA                 |
| TB3-13C   | tA              | Gt/La/tA  | tA       | tA       | La/tA       | –              | tA                 |
| TB3-20G   | Gt/tA           | La/tA     | Gt/La/tA | Gt/La/tA | La/tA       | –              | tA                 |
| TB3-23A   | tA/bA           | Gt/La/tA  | Gt/La/tA | La/tA    | La/tA       | –              | tA                 |
| TB3-25I   | tA/bA           | La/tA     | –        | La/tA/bA | La/tA       | –              | tA                 |
| TB3-25J   | Gt/tA           | Gt/La/tA  | Gt/La/tA | Gt/tA    | La/tA       | –              | tA                 |
| TB4-07F   | tA              | La/tA     | La/tA    | La/tA    | La/tA/bA    | –              | tA                 |
| TB4-12C   | tA              | La/tA     | La/tA    | Gt/tA    | tA          | –              | tA                 |
| TB4-15I   | Gt/tA           | La/tA     | La/tA    | –        | La/tA       | –              | tA                 |
| TB4-15J   | tA              | La/tA     | tA       | –        | La/tA       | –              | tA                 |
| TB4-17G   | tA/bA           | tA        | La/tA    | tA       | La/tA       | –              | tA                 |
| TB4-19A   | tA/bA           | La/tA/bA  | La/tA/bA | La/bA    | La/tA/bA    | –              | tA                 |
| TB4-19F   | tA/bA           | La/tA/bA  | La/tA    | tA       | La/tA       | –              | tA                 |
| TB4-19K   | Gt/tA           | tA        | tA       | –        | La/tA       | –              | tA                 |
| YV15-03   | tA              | Gt/tA     | tA       | –        | La/tA       | –              | tA                 |
| YV15-21   | tA              | La/tA     | La/tA    | Gt/tA    | tA          | –              | tA                 |
| YV15-23   | Gt/tA           | La/tA     | tA       | –        | La/tA       | –              | tA                 |
| YV15-24   | tA              | La/tA     | La/tA    | Gt/tA    | Gt/La/tA    | –              | tA                 |
| AB16-4611 | La              | La/tA     | tA       | –        | La/tA       | tA             | tA                 |
| TB2-32c   | Gt/tA           | La/tA     | tA       | –        | La/tA       | –              | tA                 |
| TB2-33b   | tA              | La/tA     | La/tA    | tA       | La/tA       | tA             | tA                 |
| TB2-35    | Gt/tA           | La/tA     | La/tA    | –        | La/tA       | –              | tA                 |
| TB2-35b   | tA              | La/tA     | tA/La    | –        | La/tA       | –              | tA                 |
| TB2-35d   | Gt              | Gt/tA     | tA       | –        | Gt/tA       | –              | tA                 |
| TB2-41c   | La/tA           | Gt/tA     | tA       | –        | La/tA       | –              | tA                 |
| TB2-46A   | tA              | Gt/tA     | tA       | –        | Gt/La/tA    | –              | tA                 |
| TB2-50d   | Gt/tA           | La/tA     | La/tA    | La/tA    | La/tA       | tA             | tA                 |
| TB4-17B   | tA              | La/tA     | La/tA/bA | tA       | La/tA/bA    | –              | tA                 |
| TB4-17J   | tA              | Gt/La/tA  | Gt/La/tA | –        | Gt/La/tA    | –              | tA                 |
| YV15-13   | Gt/tA           | La/tA     | La/tA    | La/tA    | La/tA       | –              | tA                 |
| TB2-31A   | tA              | La/tA     | La/tA    | La/tA    | La/tA       | –              | tA                 |
| TB2-31B   | tA              | La/tA     | La/tA    | La/tA    | La/tA       | –              | tA                 |
| TB2-31C   | –               | La/tA     | tA       | –        | La/tA       | –              | tA                 |
| TB2-33C   | tA              | La/tA     | tA       | –        | La/tA       | –              | tA                 |

Table S1 continued.

| Sample  | Field character | Ti vs. Zr | Ti vs. V | Cr vs. Y | Zr vs. Zr/Y | Cpx Mg# vs. Ti | Assigned Lava Unit |
|---------|-----------------|-----------|----------|----------|-------------|----------------|--------------------|
| TB2-33D | tA              | La/tA     | La/tA    | tA       | La/tA       | –              | <b>tA</b>          |
| TB2-34D | tA              | tA        | La/tA    | –        | Gt/tA       | tA             | <b>tA</b>          |
| TB2-38B | Gt/tA           | Gt/tA     | tA       | –        | La/tA       | –              | <b>tA</b>          |
| TB2-41A | –               | Gt/tA     | tA       | –        | Gt/A        | –              | <b>tA</b>          |
| TB3-03D | –               | La/tA     | La/tA    | –        | La/tA/bA    | tA             | <b>tA</b>          |
| TB3-14C | tA/bA           | La/tA     | La/tA    | La/tA    | tA/bA       | –              | <b>tA</b>          |
| TB3-14E | tA/bA           | Gt/La/tA  | La/tA    | Gt/La/tA | La/tA       | –              | <b>tA</b>          |
| TB3-14F | tA              | La/tA     | La/tA    | La/tA    | tA          | –              | <b>tA</b>          |
| TB3-25G | Gt/tA           | La/tA     | Gt/La/tA | Gt/La/tA | La/tA       | –              | <b>tA</b>          |
| TB2-43C | –               | La/tA     | La/tA    | –        | La/tA       | tA/bA          | <b>tA</b>          |
| TB2-44D | –               | La/tA     | tA       | –        | La/tA       | tA             | <b>tA</b>          |
| TB2-45A | –               | La/tA     | La/tA    | –        | La/tA       | –              | <b>tA</b>          |
| TB3-19A | –               | La/tA     | tA       | –        | La/tA       | tA             | <b>tA</b>          |
| SP18-B7 | –               | La/tA/bA  | bA       | La/bA    | La/tA       | –              | <b>bA</b>          |
| TB3-25H | tA/bA           | La/tA     | tA       | –        | La/tA       | –              | <b>tA</b>          |
| TB4-20L | tA/bA           | La/tA     | La/tA    | –        | La/tA       | –              | <b>tA</b>          |

\* Lava unit codes: Gt = Geotimes; fG = Felsic Geotimes; La = Lasail, dL = Depleted Lasail; Gt–La = Transitional Geotimes–Lasail; tA = Tholeiitic Alley; fA = Felsic Alley; T-A = Transitional Alley; bA = Boninitic Alley

Table S2. List of previously published sample locations and unit assignments used for mapping

| Reference                         | Sample        | UTM mE | UTM mN  | Sample Type <sup>1</sup> | Previous assignment <sup>2</sup> | Assigned lava unit |
|-----------------------------------|---------------|--------|---------|--------------------------|----------------------------------|--------------------|
| Belgrano & Diamond (2019)         | TB3-03D       | 430912 | 2746032 | MF                       | tA                               | tA                 |
| Belgrano & Diamond (2019)         | TB3-07C       | 432314 | 2737598 | PL                       | Gt                               | Gt                 |
| Kusano et al. (2017)              | OM16-113      | 441682 | 2687375 | GL                       | LV2                              | tA                 |
| Kusano et al. (2017)              | OM17-59C      | 450762 | 2696028 | GL                       | LV2                              | tA                 |
| Kusano et al. (2017)              | OM17-59D      | 450762 | 2696028 | GL                       | LV2                              | tA                 |
| Kusano et al. (2017)              | OM16-73B      | 436731 | 2738816 | GL                       | LV2                              | <b>T-A*</b>        |
| Kusano et al. (2017)              | 12SH12        | 455376 | 2667404 | GL                       | LV2                              | <b>T-A*</b>        |
| Kusano et al. (2017)              | 12SH13        | 455376 | 2667404 | GL                       | LV2                              | <b>ba*</b>         |
| Kusano et al. (2017)              | OM17-62A      | 450352 | 2694376 | GL                       | UV2                              | bA                 |
| Kusano et al. (2017)              | OM17-62D      | 450352 | 2694376 | GL                       | UV2                              | bA                 |
| Kusano et al. (2017)              | OM17-62E      | 450352 | 2694376 | GL                       | UV2                              | bA                 |
| Kusano et al. (2017)              | OM17-63C-1    | 450158 | 2694211 | GL                       | UV2                              | bA                 |
| Kusano et al. (2017)              | OM17-63C-2    | 450158 | 2694211 | GL                       | UV2                              | bA                 |
| Kusano et al. (2017)              | OM16-84A      | 438714 | 2725582 | GL                       | UV2                              | bA                 |
| Kusano et al. (2017)              | OM14-2C       | 448130 | 2691007 | GL                       | UV2                              | bA                 |
| Kusano et al. (2017)              | OM16-46C      | 448118 | 2691017 | GL                       | UV2                              | bA                 |
| Kusano et al. (2017)              | OM17-28C      | 454484 | 2671056 | GL                       | UV2                              | bA                 |
| Kusano et al. (2017)              | OM17-80A      | 450349 | 2691829 | GL                       | UV2                              | bA                 |
| Kusano et al. (2017)              | OM17-97B-2    | 438091 | 2718062 | GL                       | UV2                              | bA                 |
| Kusano et al. (2017)              | OM17-67AB     | 449937 | 2692255 | GL                       | V1                               | GT-F               |
| Kusano et al. (2017)              | OM17-67B      | 449937 | 2692255 | GL                       | V1                               | GT-F               |
| Gilgen et al. (2016) <sup>#</sup> | WF-006        | 444615 | 2716836 | PF                       | La                               | <b>dL*</b>         |
| Gilgen et al. (2016) <sup>#</sup> | SG14-08       | 432248 | 2741531 | PF                       | La                               | <b>dL*</b>         |
| Gilgen et al. (2016) <sup>#</sup> | RaM-010       | 437328 | 2730669 | PF                       | La                               | <b>dL*</b>         |
| Gilgen et al. (2016) <sup>#</sup> | SG14-21       | 438651 | 2700428 | PF                       | Gt                               | Gt                 |
| Gilgen et al. (2016) <sup>#</sup> | AB16-4584     | 430229 | 2743811 | PF                       | Gt                               | GT                 |
| Gilgen et al. (2016) <sup>#</sup> | WF-008        | 443215 | 2716157 | PF                       | Gt                               | GT                 |
| Gilgen et al. (2016) <sup>#</sup> | SG14-20       | 438875 | 2700434 | PF                       | La                               | La                 |
| Gilgen et al. (2016) <sup>#</sup> | RN-002        | 436006 | 2725401 | PF                       | La                               | La                 |
| Gilgen et al. (2016) <sup>#</sup> | RN-005        | 435566 | 2725434 | PF                       | La                               | La                 |
| Gilgen et al. (2014)              | Lasail HW     | 442869 | 2684460 | P                        | tA                               | tA                 |
| Gilgen et al. (2014)              | Mandoos FW    | 437167 | 2733153 | P                        | tA                               | tA                 |
| Gilgen et al. (2014)              | Mandoos HW    | 437250 | 2733100 | MF                       | tA                               | tA                 |
| Gilgen et al. (2014)              | Zuha HW       | 452374 | 2675737 | MF                       | tA                               | tA                 |
| Gilgen et al. (2014)              | Maqail HW     | 453453 | 2661446 | P                        | tA                               | tA                 |
| Gilgen et al. (2014)              | Shinas FW     | 437885 | 2740740 | P                        | tA                               | tA                 |
| Gilgen et al. (2014)              | Shinas HW     | 437850 | 2740810 | P                        | tA                               | <b>T-A*</b>        |
| Gilgen et al. (2014)              | Safwa FW      | 436049 | 2716175 | P                        | bA                               | bA                 |
| Gilgen et al. (2014)              | Safwa HW      | 436075 | 2716125 | P                        | bA                               | bA                 |
| Gilgen et al. (2014)              | Aarja FW      | 440159 | 2692927 | F                        | bA                               | bA                 |
| Gilgen et al. (2014)              | Daris 3A-5 FW | 534120 | 2614195 | P                        | bA                               | bA                 |
| Gilgen et al. (2014)              | Al Bishara FW | 453181 | 2618560 | PF-DC                    | bA                               | bA                 |
| Gilgen et al. (2014)              | Al Bishara FW | 453181 | 2618560 | PF-DC                    | bA                               | bA                 |
| Gilgen et al. (2014)              | Rakah FW      | 457543 | 2618830 | PF-DC                    | bA                               | bA                 |
| Gilgen et al. (2014)              | Rakah HW      | 457543 | 2618830 | PF-DC                    | bA                               | bA                 |
| Gilgen et al. (2014)              | Aarja HW      | 440365 | 2692871 | MF                       | bA                               | bA                 |
| Gilgen et al. (2014)              | Rakah HW      | 457309 | 2618809 | P                        | bA                               | bA                 |
| Gilgen et al. (2014)              | Rakah FW      | 457394 | 2618752 | P                        | bA                               | bA                 |
| Gilgen et al. (2014)              | Aswad HW      | 431625 | 2749825 | P                        | Gt                               | Gt                 |
| Gilgen et al. (2014)              | Hatta M. HW   | 432806 | 2739967 | MF                       | Gt                               | Gt                 |
| Gilgen et al. (2014)              | Hatta E. HW   | 433022 | 2739625 | MF                       | Gt                               | Gt                 |
| Gilgen et al. (2014)              | Hatta E. FW   | 433019 | 2739652 | P                        | Gt                               | Gt                 |

Table S2 continued.

| Reference             | Sample       | UTM mE | UTM mN  | Sample Type <sup>1</sup> | Previous assignment <sup>2</sup> | Assigned lava unit |
|-----------------------|--------------|--------|---------|--------------------------|----------------------------------|--------------------|
| Gilgen et al. (2014)  | Hatta S. FW  | 432867 | 2739325 | P                        | Gt                               | Gt                 |
| Gilgen et al. (2014)  | Zuha FW      | 452055 | 2675476 | PF–DC                    | Gt                               | Gt                 |
| Gilgen et al. (2014)  | Lasail FW    | 442372 | 2684648 | F                        | Gt                               | Gt                 |
| Gilgen et al. (2014)  | Hatta M. FW  | 432766 | 2740199 | P                        | Gt                               | Gt                 |
| Gilgen et al. (2014)  | Hatta M. HW  | 432766 | 2740199 | P                        | Gt                               | Gt                 |
| Gilgen et al. (2014)  | Zuha FW      | 452315 | 2675699 | P                        | Gt                               | Gt                 |
| Gilgen et al. (2014)  | Aswad FW     | 431625 | 2749825 | MF                       | Gt                               | Gt                 |
| Gilgen et al. (2014)  | Kaznah FW    | 436181 | 2754981 | DC                       | Gt                               | fG                 |
| Gilgen et al. (2014)  | Mahab FW     | 468745 | 2656161 | P                        | Gt                               | fG                 |
| Gilgen et al. (2014)  | Maqail FW    | 453428 | 2661425 | P                        | Gt                               | fG                 |
| Gilgen et al. (2014)  | Ghuzayn 1 FW | 498884 | 2634728 | MF                       | Gt                               | fG                 |
| Gilgen et al. (2014)  | Daris E. FW  | 543365 | 2609170 | PF–DC                    | Gt                               | fG                 |
| Gilgen et al. (2014)  | Mahab 4 FW   | 468760 | 2656345 | PF–DC                    | Gt                               | fG                 |
| Gilgen et al. (2014)  | Ghuzayn 3 HW | 496843 | 2635783 | PF–DC                    | La                               | La                 |
| Gilgen et al. (2014)  | Ghuzayn 3 FW | 496843 | 2635783 | PF–DC                    | La                               | La                 |
| Gilgen et al. (2014)  | Khaznah HW   | 436181 | 2754981 | DC                       | La                               | La                 |
| Gilgen et al. (2014)  | Mahab 4 HW   | 468838 | 2656250 | P                        | La                               | La                 |
| Gilgen et al. (2014)  | Ghuzayn 1 HW | 498766 | 2635411 | MF                       | La                               | La                 |
| Gilgen et al. (2014)  | Mahab 4 HW   | 468760 | 2656345 | PF–DC                    | La                               | La                 |
| MacLeod et al. (2013) | 99OC109      | 602429 | 2517609 | –                        | V1                               | Gt                 |
| MacLeod et al. (2013) | 89OC130      | 500500 | 2635300 | –                        | V1                               | Gt                 |
| MacLeod et al. (2013) | 89OC132      | 500400 | 2635400 | –                        | V1                               | Gt                 |
| MacLeod et al. (2013) | 89OC126      | 500800 | 2634900 | –                        | V1                               | Gt                 |
| MacLeod et al. (2013) | 89OC134      | 500400 | 2635400 | –                        | V1                               | Gt                 |
| MacLeod et al. (2013) | 99OC199      | 510600 | 2626500 | –                        | V1                               | Gt                 |
| MacLeod et al. (2013) | 97OC132      | 435800 | 2721000 | –                        | V1                               | Gt                 |
| MacLeod et al. (2013) | 89OC125      | 500800 | 2634900 | –                        | V1                               | Gt                 |
| MacLeod et al. (2013) | 89OC131      | 500600 | 2635100 | –                        | V1                               | Gt                 |
| MacLeod et al. (2013) | 99OC165      | 452219 | 2666303 | –                        | V1                               | Gt                 |
| MacLeod et al. (2013) | 97OC134      | 435400 | 2721600 | –                        | V1                               | Gt                 |
| MacLeod et al. (2013) | 89OC120      | 501300 | 2634600 | –                        | V1                               | Gt                 |
| MacLeod et al. (2013) | 97OC136      | 435100 | 2722000 | –                        | V1                               | Gt                 |
| MacLeod et al. (2013) | 89OC121      | 501300 | 2634600 | –                        | V1                               | Gt                 |
| MacLeod et al. (2013) | 99OC163      | 451452 | 2666564 | –                        | V1                               | Gt                 |
| MacLeod et al. (2013) | 89OC119      | 501300 | 2634600 | –                        | V1                               | Gt                 |
| MacLeod et al. (2013) | 89OC118      | 501300 | 2634600 | –                        | V1                               | Gt                 |
| MacLeod et al. (2013) | 89OC117      | 501400 | 2634600 | –                        | V1                               | Gt                 |
| MacLeod et al. (2013) | 89OC114      | 501700 | 2634300 | –                        | V1                               | Gt                 |
| MacLeod et al. (2013) | 89OC115      | 501700 | 2634300 | –                        | V1                               | Gt                 |
| MacLeod et al. (2013) | 89OC116      | 501600 | 2634400 | –                        | V1                               | Gt                 |

All coordinates converted to UTM Zone 40 North ( in meters)

\*Note: Gilgen et al. (2016) sample locations originally erroneously reported in UTM 'Fahud' projection, coordinates are corrected to WGS 84/UTM 40 N here.

<sup>1</sup>Sample type codes: PF = Pillow flow; MF = Massive flow; GL = volcanic glass; PF–DC = Pillow flow from drill core

<sup>2</sup>Lava unit codes: V1= Volcanic Unit 1 (Geotimes); LV2 = Lower Volcanic Unit 2 (Tholeiitic Alley); UV2 = Upper Volcanic Unit 2 (Boninitic Alley); Gt = Geotimes; fG = Felsic Geotimes; La = Lasail, dL = Depleted Lasail; tA = Tholeiitic Alley; fA = Felsic Alley; T-A = Transitional Alley; bA = Boninitic Alley

\***Samples** assigned to a different unit in this study than originally reported.

Table S3. XRF measurements of basalt standards

|                                | BCR-2G <sup>1</sup> (basaltic glass) |                |                    | BRP-1 <sup>2</sup> (basalt whole-rock) |                |                    |
|--------------------------------|--------------------------------------|----------------|--------------------|----------------------------------------|----------------|--------------------|
|                                | Reference value                      | Measured value | Measured/Reference | Reference value                        | Measured value | Measured/Reference |
|                                | (wt%)                                | (wt%)          | (%)                | (wt%)                                  | (wt%)          | (%)                |
| SiO <sub>2</sub>               | 54.1                                 | 53.95          | <b>-0.28</b>       | 50.39                                  | 50.36          | <b>-0.06</b>       |
| TiO <sub>2</sub>               | 2.26                                 | 2.25           | <b>-0.44</b>       | 3.81                                   | 3.83           | <b>0.52</b>        |
| Al <sub>2</sub> O <sub>3</sub> | 13.5                                 | 13.44          | <b>-0.44</b>       | 12.40                                  | 12.38          | <b>-0.16</b>       |
| Fe <sub>2</sub> O <sub>3</sub> | 13.8                                 | 13.75          | <b>-0.36</b>       | 15.59                                  | 15.48          | <b>-0.71</b>       |
| MnO                            | 0.196                                | 0.2            | <b>2.04</b>        | 0.214                                  | 0.22           | <b>2.8</b>         |
| MgO                            | 3.59                                 | 3.57           | <b>-0.56</b>       | 3.94                                   | 3.89           | <b>-1.27</b>       |
| CaO                            | 7.12                                 | 7.1            | <b>-0.28</b>       | 7.95                                   | 7.94           | <b>-0.13</b>       |
| Na <sub>2</sub> O              | 3.16                                 | 3.15           | <b>-0.32</b>       | 2.71                                   | 2.7            | <b>-0.37</b>       |
| K <sub>2</sub> O               | 1.79                                 | 1.78           | <b>-0.56</b>       | 1.52                                   | 1.54           | <b>1.32</b>        |
| P <sub>2</sub> O <sub>5</sub>  | 0.35                                 | 0.36           | <b>2.86</b>        | 0.63                                   | 0.64           | <b>1.59</b>        |
| LOI <sup>4</sup>               | –                                    | –              | –                  | 0.50                                   | 0.47           | <b>-6</b>          |
| Sum of major elements + LOI    | 99.55                                |                |                    | 99.45                                  |                |                    |
|                                | (μg/g)                               | (μg/g)         | (%)                | (μg/g)                                 | (μg/g)         | (%)                |
| Ba                             | 683                                  | 684            | <b>0.15</b>        | 555                                    | 555            | <b>0.07</b>        |
| Cr                             | 18                                   | 11.4           | <b>-36.67</b>      | 12.4                                   | 1.7            | <b>-86.29</b>      |
| Cu                             | 19                                   | 19.5           | <b>2.63</b>        | 160                                    | 157            | <b>-1.75</b>       |
| Ni                             | 17                                   | 15             | <b>-11.76</b>      | 23.4                                   | 18             | <b>-23.08</b>      |
| Sc                             | 33                                   | 32.3           | <b>-2.12</b>       | 28.5                                   | 26.4           | <b>-7.37</b>       |
| Sr                             | 346                                  | 333            | <b>-3.76</b>       | 492                                    | 497            | <b>0.93</b>        |
| V                              | 416                                  | 408            | <b>-1.92</b>       | 391                                    | 394            | <b>0.84</b>        |
| Y                              | 37                                   | 37             | <b>0</b>           | 42.0                                   | 43.8           | <b>4.29</b>        |
| Zn                             | 127                                  | 128            | <b>0.79</b>        | 142                                    | 159            | <b>11.69</b>       |
| Zr                             | 188                                  | 182            | <b>-3.19</b>       | 310                                    | 309            | <b>-0.35</b>       |

<sup>1</sup> BCR-2G basalt glass standard, reference values from GeoReM v. 18, 01/2015 (Jochum et al., 2005), total Fe calculated as Fe<sub>2</sub>O<sub>3</sub><sup>2</sup> BRP-1, Powdered basalt standard, reference values from Cotta and Enzweiler (2008), total Fe calculated as Fe<sub>2</sub>O<sub>3</sub><sup>3</sup> LLD = lower limit of detection<sup>4</sup> LOI = loss on ignition, after heating in air at 1050°C for 2 hrs

Table S4. LA-ICP-MS measurements of basalt and komatiitic standards.

|         |         | BRP-1 <sup>1</sup> |          |                 |     |                    |           | OKUM <sup>2</sup> |                 |      |                    |           |      | BCR-2G <sup>3</sup> |     |                    |  |  |  |
|---------|---------|--------------------|----------|-----------------|-----|--------------------|-----------|-------------------|-----------------|------|--------------------|-----------|------|---------------------|-----|--------------------|--|--|--|
|         |         | Reference          |          | Measured values |     |                    | Reference |                   | Measured values |      |                    | Reference |      | Measured values     |     |                    |  |  |  |
| Element | Isotope | R.V. <sup>4</sup>  | 95% C.I. | Mean (n=18)     | 1σ  | Measured/Reference | R.V.      | 95% C.I.          | Mean (n=6)      | 1σ   | Measured/Reference | R.V.      | ±    | Mean (n=4)          | 1σ  | Measured/Reference |  |  |  |
|         |         | (μg/g)             | (%)      | (μg/g)          | (%) | (%)                | (μg/g)    | (%)               | (μg/g)          | (%)  | (%)                | (μg/g)    | (%)  | (μg/g)              | (%) | (%)                |  |  |  |
| Li      | Li7     | 7.16               | N.R      | 6.54            | 2.7 | -8.7               | 4.4       | 6.8               | 4.15            | 6.7  | -5.7               | 9         | 11.1 | 9.26                | 1.4 | 2.9                |  |  |  |
| Be      | Be9     | 1.82               | N.R      | 2.02            | 9   | 11.0               | 0.065     | 6.2               | 0.111           | 44.3 | 70.8               | 2.3       | 17.4 | 2.58                | 7.8 | 12.2               |  |  |  |
| B       | B11     | N.R                | N.R      | 2.88            | 2.3 | -                  | N.R       | N.R               | 6.75            | 4.2  | -                  | 6         | 16.7 | 4.41                | 6.6 | -26.6              |  |  |  |
| Sc      | Sc45    | 28.7               | 2.8      | 30.3            | 1.4 | 5.4                | 27.9      | 5.4               | 29.8            | 0.6  | 6.8                | 33        | 6.1  | 35.7                | 1.1 | 8.2                |  |  |  |
| V       | V51     | 394                | 1.8      | 408             | 3.1 | 3.6                | 168       | 1.8               | 171             | 0.4  | 1.9                | 425       | 4.2  | 445                 | 1.6 | 4.7                |  |  |  |
| Cr      | Cr53    | 12.5               | 8.1      | 12.9            | 7.5 | 3.1                | 2460      | 1.3               | 2411            | 1.2  | -2.0               | 17        | 11.8 | 17.0                | 4.6 | 0.0                |  |  |  |
| Co      | Co59    | 37.8               | 3.7      | 36.8            | 2.4 | -2.7               | 88.9      | 1.7               | 88.8            | 0.4  | -0.1               | 38        | 5.3  | 38.4                | 0.6 | 1.1                |  |  |  |
| Ni      | Ni62    | 23.6               | 3.8      | 22.3            | 4.7 | -5.5               | 886       | 1.1               | 859             | 1.1  | -3.0               | 13        | 15.4 | 12.6                | 5.3 | -3.1               |  |  |  |
| Cu      | Cu65    | 161                | 1.9      | 150             | 4.5 | -7.0               | 43.5      | 2.8               | 45.0            | 4.1  | 3.4                | 21        | 23.8 | 17.6                | 1.8 | -16.2              |  |  |  |
| Zn      | Zn66    | 143                | 1.4      | 117             | 2.8 | -18.3              | 61.2      | 3.1               | 55.2            | 1.6  | -9.8               | 125       | 4    | 149                 | 0.7 | 19.2               |  |  |  |
| Ga      | Ga71    | 25                 | 2.4      | 22.6            | 1.7 | -9.6               | 8.79      | 1.8               | 8.29            | 1.8  | -5.7               | 23        | 4.3  | 21.4                | 1.1 | -7.0               |  |  |  |
| Ge      | Ge73    | 1.71               | N.R      | 3.00            | 6.1 | 75.4               | N.R       | N.R               | 1.02            | 11.4 | -                  | 1.5       | 6.7  | 1.80                | 5.9 | 20.0               |  |  |  |
| As      | As75    | N.R                | N.R      | 0.403           | 7.1 | -                  | N.R       | N.R               | 0.203           | 72.8 | -                  | N.R       | N.R  | 0.58                | 3.4 | -                  |  |  |  |
| Rb      | Rb85    | 35.7               | 2.8      | 32.3            | 1.8 | -9.5               | 0.96      | 6.3               | 0.867           | 1.6  | -9.7               | 47        | 1.1  | 45.4                | 0.2 | -3.4               |  |  |  |
| Sr      | Sr88    | 496                | 1.2      | 503             | 1.5 | 1.4                | 16.1      | 6.2               | 15.9            | 1.1  | -1.2               | 342       | 1.2  | 337                 | 1.1 | -1.5               |  |  |  |
| Y       | Y89     | 42.4               | 2.4      | 40.8            | 1.8 | -3.7               | 9.08      | 3.2               | 9.03            | 1.6  | -0.6               | 35        | 8.6  | 35.3                | 1.2 | 0.9                |  |  |  |
| Zr      | Zr90    | 313                | 1.6      | 312             | 1.9 | -0.2               | 17        | 8.2               | 17.3            | 8.8  | 1.8                | 184       | 8.2  | 185                 | 1.1 | 0.5                |  |  |  |
| Nb      | Nb93    | 29.4               | 3.1      | 28.7            | 1.5 | -2.2               | 0.37      | 16.2              | 0.349           | 2.1  | -5.7               | 12.5      | 8    | 11.8                | 0.3 | -5.6               |  |  |  |
| Mo      | Mo95    | 1.51               | N.R      | 1.40            | 5.2 | -7.3               | N.R       | N.R               | 0.237           | 21.1 | -                  | 270       | 11.1 | 262                 | 1.2 | -3.0               |  |  |  |
| In      | In115   | 0.13               | N.R      | 0.11            | 7.4 | -15.4              | N.R       | N.R               | 0.029           | 9.3  | -                  | 0.11      | 18.2 | 0.090               | 6.0 | -18.2              |  |  |  |
| Cs      | Cs133   | 0.37               | 5.4      | 0.34            | 2.8 | -8.1               | 0.184     | 1.6               | 0.176           | 7.1  | -4.3               | 1.16      | 6    | 1.14                | 1.9 | -1.7               |  |  |  |
| Ba      | Ba137   | 560                | 1.3      | 537.66          | 1.5 | -3.9               | 6.2       | 8.1               | 5.78            | 2.1  | -6.8               | 683       | 1    | 668                 | 0.5 | -2.2               |  |  |  |
| La      | La139   | 43                 | 2.3      | 41.6            | 1.3 | -3.2               | 0.412     | 4.1               | 0.424           | 3.7  | 2.9                | 24.7      | 1.2  | 25.2                | 1.2 | 2.0                |  |  |  |
| Ce      | Ce140   | 94.1               | 1.3      | 92.4            | 1.3 | -1.8               | 1.27      | 2.4               | 1.27            | 2.8  | 0.0                | 53.3      | 0.9  | 53.4                | 0.8 | 0.2                |  |  |  |
| Pr      | Pr141   | 12.4               | 1.6      | 11.7            | 1.2 | -5.6               | 0.235     | 3.4               | 0.225           | 3.3  | -4.3               | 6.7       | 6    | 6.60                | 1.8 | -1.5               |  |  |  |
| Nd      | Nd146   | 52.3               | 1.7      | 51.6            | 1.6 | -1.4               | 1.494     | 1.3               | 1.45            | 2.8  | -2.9               | 28.9      | 1    | 29.0                | 1.3 | 0.3                |  |  |  |
| Sm      | Sm147   | 11.3               | 1.8      | 11.1            | 2.1 | -1.8               | 0.715     | 1.5               | 0.686           | 5.7  | -4.1               | 6.59      | 1.1  | 6.69                | 2.0 | 1.5                |  |  |  |
| Eu      | Eu151   | 3.45               | 2.3      | 3.40            | 2   | -1.4               | 0.3       | 2.3               | 0.283           | 4.1  | -5.7               | 1.97      | 1    | 2.00                | 1.9 | 1.5                |  |  |  |
| Gd      | Gd157   | 10.5               | 2.9      | 10.4            | 2.8 | -0.9               | 1.17      | 6.0               | 1.17            | 4.6  | 0.0                | 6.71      | 1    | 6.98                | 2.8 | 4.0                |  |  |  |
| Tb      | Tb159   | 1.53               | 3.3      | 1.40            | 2.1 | -8.5               | 0.229     | 4.4               | 0.218           | 2.8  | -4.8               | 1.02      | 7.8  | 1.01                | 2.5 | -1.0               |  |  |  |
| Dy      | Dy161   | 8.57               | 3.5      | 8.23            | 1.8 | -4.0               | 1.61      | 2.5               | 1.54            | 3.3  | -4.3               | 6.44      | 0.9  | 6.46                | 1.9 | 0.3                |  |  |  |
| Ho      | Ho165   | 1.63               | 3.7      | 1.55            | 2.1 | -4.9               | 0.355     | 2.5               | 0.339           | 1.6  | -4.5               | 1.27      | 6.3  | 1.29                | 1.9 | 1.6                |  |  |  |
| Er      | Er167   | 4.24               | 2.4      | 4.25            | 2.4 | 0.2                | 1.041     | 1.3               | 1.04            | 2.9  | -0.1               | 3.7       | 1.1  | 3.92                | 4.4 | 5.9                |  |  |  |
| Tm      | Tm169   | 0.57               | 3.5      | 0.528           | 3.1 | -7.4               | 0.155     | 3.9               | 0.137           | 3.2  | -11.6              | 0.51      | 7.8  | 0.50                | 5.1 | -1.4               |  |  |  |
| Yb      | Yb173   | 3.51               | 2.6      | 3.44            | 2.1 | -2.0               | 1.009     | 2.3               | 0.977           | 2.2  | -3.2               | 3.39      | 0.9  | 3.50                | 1.4 | 3.2                |  |  |  |
| Lu      | Lu175   | 0.5                | 4.0      | 0.483           | 2.7 | -3.4               | 0.148     | 3.4               | 0.145           | 3    | -2.0               | 0.5       | 1    | 0.516               | 3.0 | 2.6                |  |  |  |
| Hf      | Hf178   | 8.07               | 2.5      | 7.66            | 2.5 | -5.1               | 0.551     | 4.2               | 0.515           | 5.3  | -6.5               | 4.84      | 5.8  | 4.99                | 2.0 | 3.1                |  |  |  |
| Ta      | Ta181   | 1.98               | 4.1      | 1.70            | 1.6 | -14.1              | 0.026     | 14.4              | 0.0193          | 9.9  | -26.9              | 0.78      | 7.7  | 0.713               | 3.0 | -8.6               |  |  |  |
| Pb      | Pb208   | 5.55               | 5.5      | 5.06            | 2.7 | -8.8               | 0.26      | 7.7               | 0.213           | 8    | -18.1              | 11        | 9.1  | 11.0                | 1.7 | -0.3               |  |  |  |
| Th      | Th232   | 4                  | 2.5      | 3.69            | 1.6 | -7.8               | 0.031     | 12.9              | 0.0274          | 4.9  | -11.6              | 5.9       | 5.1  | 5.60                | 1.3 | -5.1               |  |  |  |
| U       | U238    | 0.83               | 3.7      | 0.805           | 2.1 | -3.0               | 0.012     | 41.7              | 0.0104          | 18.3 | -13.1              | 1.69      | 7.1  | 1.73                | 1.5 | 2.4                |  |  |  |

Note: LA-ICP-MS standard measurements previously reported in Belgrano & Diamond (2019); samples were measured together.

R.V. = Reference Value; N.R. = no reference value; N.M. = not measured

<sup>1</sup> BRP-1 basalt standard prepared as powder pellet, reference values from Cotta and Enzweiler (2008), total Fe calculated as Fe2O3

<sup>2</sup> OKUM komatiite standard prepared as a powder pellet, reference values from Kane et al. (2007), total Fe calculated as Fe2O3

<sup>3</sup> BCR-2G basaltic glass standard directly measured, reference values from GeoReM v. 18, 01/2015 (Jochum et al., 2005), total Fe calculated FeO
