# Supplementary material for: A revised map of volcanic units in the Oman ophiolite: insights into the architecture of an oceanic proto-arc volcanic sequence
Source: Copernicus journal article supplement (doi:10.5194/se-2019-69), 2019-04-18
Supplement: Supplementary file 1 [file Volcanic_Mapping_Datasets_Supplement.xlsx]

## Sheet: XRF_whole-rock
Sample	Longitude ˚E	Latitude ˚N	Lava Unit	Sample Type	Alteration	SiO2	TiO2	Al2O3	Fe2O3	MnO	MgO	CaO	Na2O	K2O	P2O5	LOI	Ba	Sr	Zr	Y	Zn	Cu	Ni	Cr	V	Sc
						wt%	wt%	wt%	wt%	wt%	wt%	wt%	wt%	wt%	wt%	wt%	µg/g	µg/g	µg/g	µg/g	µg/g	µg/g	µg/g	µg/g	µg/g	µg/g
LD10-1456	56.3665	24.3367	Boninitic Alley	Pillow flow	Spilite	67.26	0.33	12.68	4.16	0.09	4.13	6.44	4.07	0.78	0.06	4.73	46	276	33	9	24	26	45	166	131	23
LD10-1464	56.3679	24.3366	Boninitic Alley	Pillow flow	Spilite	56.91	0.44	17	6.16	0.08	4.98	9.27	5.1	0.02	0.05	4.61	8	69	36	10	25	44	67	207	222	26
SG14-28	56.3218	24.8138	Boninitic Alley	Pillow flow	Spilite	58.04	0.37	14.86	7.97	0.13	7.64	6.24	4.65	0.07	0.03	6.69	18	74	19	11	66	126	51	133	211	41
SG14-29	56.3304	24.8197	Boninitic Alley	Pillow flow	Spilite	55.23	0.3	13.93	7.1	0.11	8.05	9.95	5.26	0.04	0.02	4.18	59	60	16	10	40	123	137	615	190	39
SP18-B7	56.5409	24.1164	Boninitic Alley	Pillow flow	Spilite	55.76	0.39	14.98	7.94	0.2	8.34	7.28	4.93	0.14	0.03	3.88	48	118	21	12	50	82	71	277	244	39
SP18-D2	56.3961	24.4749	Boninitic Alley	Pillow flow	Spilite	48.45	0.19	9.11	9.27	0.21	17.09	15.03	0.52	0.11	0.02	7.4	16	136	13	7	75	33	584	1818	216	44
TB2-19A	56.4485	24.2402	Boninitic Alley	Pillow flow	Actinolite	52.66	0.47	12.88	8.71	0.17	12.09	10.41	2.31	0.26	0.04	4.51	31	227	29	13	76	10	261	712	219	38
TB4-09B	56.4503	24.6442	Boninitic Alley	Pillow flow	Spilite	50.28	0.47	16.12	9.73	0.15	12.89	9.08	0.97	0.28	0.03	6.77	57	444	22	13	62	95	190	623	201	44
TB4-10A	56.4308	24.6382	Boninitic Alley	Pillow flow	Spilite	50.27	0.23	15.68	6.71	0.14	9.18	12.4	5.29	0.08	0.01	11.43	30	69	15	6	46	63	145	488	124	37
TB4-10B	56.4317	24.6443	Boninitic Alley	Pillow flow	Spilite	56.05	0.37	15.88	7.55	0.1	6.98	7.74	5.17	0.11	0.05	4.15	24	224	19	14	52	88	62	189	327	39
TB4-17I	56.4111	24.2771	Boninitic Alley	Fresh Glass	Spilite	52.52	0.35	13.86	9.49	0.26	11.33	11.2	0.79	0.17	0.02	6.33	256	597	12	10	65	107	301	796	254	48
TB4-18H	56.3351	24.8054	Boninitic Alley	Pillow flow	Spilite	57.26	0.4	15.16	7.78	0.29	6.85	6.84	5.34	0.05	0.03	2.72	17	52	26	11	77	82	49	71	224	35
TB4-19G	57.3037	23.6333	Boninitic Alley	Pillow flow	Browstone	52.91	0.29	12.71	9.6	0.24	12.83	10.47	0.73	0.21	0.02	4.37	43	118	19	11	67	98	306	956	261	47
TB4-23A	56.5437	24.019	Boninitic Alley	Pillow flow	Spilite	54.95	0.37	16.19	7.02	0.6	9.84	5.25	5.51	0.25	0.03	5.33	120	263	20	11	63	95	48	62	199	39
AB16-4613	56.4252	24.6281	Boninitic Alley	Pillow flow	Spilite	54.14	0.45	16.37	9.03	0.15	7.43	6.41	5.18	0.82	0.03	4.24	76	270	24	12	78	99	58	134	268	41
TB2-27A	56.4768	24.5418	Boninitic Alley	Massive flow	Actinolite	52.86	0.35	11.53	9.04	0.21	13.87	9.07	3.02	0.03	0.02	3.43	27	75	22	10	66	7	318	859	225	41
TB2-42A	56.365	24.5384	Boninitic Alley	Pillow flow	Spilite	53.32	0.37	13.55	9.37	0.16	10.98	10.51	1.54	0.16	0.03	4.44	44	144	22	11	105	93	224	647	271	47
TB2-45b	56.496	24.5294	Boninitic Alley	Massive flow	Spilite	53.83	0.48	15.84	9.24	0.14	7.48	10.07	2.48	0.41	0.03	3.79	47	473	25	13	62	115	58	86	268	37
TB4-05D	56.3733	24.5824	Boninitic Alley	Pillow flow	Spilite	51.92	0.29	15.88	6.73	0.13	4.05	20.83	0.1	0.04	0.02	4.59	8	24	18	9	55	168	51	107	226	40
AB16-4550	56.453	24.5648	Boninitic Alley	Pillow flow	Spilite	54.44	0.36	13.4	8.24	0.14	10.28	11.28	1.26	0.57	0.03	3.71	81	214	23	11	59	11	194	560	224	36
TB2-21A	56.3181	24.8075	Boninitic Alley	Massive flow	Spilite	55.9	0.38	13.59	8.27	0.16	10.04	10.01	1.51	0.11	0.03	8.33	32	95	24	12	41	30	141	530	218	41
TB2-42B	56.3727	24.5351	Boninitic Alley	Pillow flow	Spilite	59.3	0.34	12.81	7.76	0.12	9.3	6.12	4.08	0.14	0.03	3.21	24	75	22	11	56	143	63	310	239	43
TB2-42C	56.3727	24.5351	Boninitic Alley	Pillow flow	Spilite	59.21	0.33	13.02	7.43	0.11	9.01	6.44	4.36	0.06	0.03	3.01	28	38	21	11	51	248	67	351	235	46
TB2-44A	56.4615	24.5576	Boninitic Alley	Massive flow	Spilite	52.96	0.31	14.19	8.35	0.15	9.81	10.76	3.15	0.3	0.02	2.62	41	125	20	11	63	101	93	388	246	50
TB3-01A	56.5131	24.5251	Boninitic Alley	Massive flow	Spilite	53.15	0.33	16.51	9.72	0.14	13.56	5.34	0.94	0.29	0.03	8.7	55	189	17	9	101	104	89	383	228	45
TB3-03A	56.329	24.786	Boninitic Alley	Massive flow	Spilite	50.28	0.44	15.79	10.7	2	6.85	9.28	4.56	0.05	0.04	9.35	24	109	28	13	90	10	59	95	341	41
TB3-19C	56.4539	24.5757	Boninitic Alley	Pillow flow	Spilite	54.14	0.43	13.5	7.98	0.14	11.4	7.9	3.93	0.56	0.03	3.43	98	106	25	10	51	157	251	621	199	34
TB3-23B	56.3812	24.5952	Boninitic Alley	Pillow flow	Spilite	47.59	0.22	12.73	10.38	0.28	15.12	11.12	2.48	0.06	0.02	9.75	30	53	14	9	97	8	378	1211	237	49
LD10-1461	56.3665	24.3367	Boninitic Alley	Pillow flow	Spilite	64.12	0.36	13.9	5.01	0.12	4.45	9.01	2.43	0.53	0.08	5.66	112	381	30	10	40	22	45	147	167	33
RaM-005	56.3805	24.6891	Depleted Lasail	Pillow flow	Spilite	55.22	0.39	14.66	7.25	0.13	7.98	8.98	5.31	0.05	0.02	3.22	12	70	19	12	46	115	159	443	194	38
TB2-40d	56.3809	24.6885	Depleted Lasail	Pillow flow	Spilite	55.51	0.38	14.22	7.08	0.12	7.49	10.6	4.54	0.03	0.03	4.17	12	40	24	11	73	8	116	384	226	35
LD10-1251	56.4538	24.5644	Felsic Alley	Massive flow	Spilite	66.35	0.83	14.14	7.36	0.1	1.91	2.33	5.97	0.88	0.13	1.37	124	53	84	29	75	150	3	<4	139	21
SP18-A8	56.3571	24.2617	Felsic Alley	Pillow flow	Spilite	59.93	1.24	14.29	9.58	0.11	2.49	7.25	4.91	0.06	0.13	3.46	33	65	100	34	89	47	11	<4	242	22
TB3-13B	57.5601	23.522	Felsic Alley	Massive flow	Spilite	72.32	0.62	13.04	4.66	0.08	1.38	1.16	6.56	0.06	0.12	2.13	20	51	102	37	69	4	3	<4	21	14
TB2-32A	56.4392	24.2755	Felsic Alley	Pillow flow	Spilite	62.37	1.08	14.14	8.91	0.42	2.89	6.7	2.17	1.19	0.13	6.49	66	743	86	38	49	6	4	<4	209	27
TB2-34A	56.4299	24.2817	Felsic Alley	Massive flow	Spilite	82	0.2	9.14	2.56	0.05	0.32	2.16	3.16	0.38	0.04	2.44	70	175	76	34	52	22	0	<4	7	11
TB3-25A	57.2491	23.6469	Felsic Alley	Massive flow	Spilite	73.48	0.62	12.19	4.47	0.1	2.34	0.88	5.22	0.58	0.11	2.37	37	135	94	32	64	7	0	<4	44	18
TB3-25C	57.261	23.6426	Felsic Alley	Massive flow	Spilite	71.84	0.68	13.26	4.31	0.08	1.49	1.36	6.5	0.34	0.14	1.74	46	65	108	38	64	7	7	<4	30	15
TB3-25E	56.5302	23.6837	Felsic Alley	Pillow flow	Spilite	58.31	1.24	14.7	11.59	0.28	4.15	4.16	5.27	0.14	0.16	3.96	44	158	97	33	115	22	16	<4	167	23
TB3-06A	56.4942	24.3783	Felsic Geotimes	Pillow flow	Spilite	61.99	1.44	14.4	9.31	0.14	1.84	3.09	7.44	0.07	0.28	2.73	40	46	160	50	34	9	0	<4	119	17
TB3-10D	56.4105	24.4596	Felsic Geotimes	Pillow flow	Spilite	70.93	0.79	12.86	5.24	0.06	0.96	1.8	7.03	0.09	0.25	1.62	21	39	206	54	64	6	0	<4	20	12
TB4-06B	56.4411	24.275	Felsic Geotimes	Pillow flow	Spilite	56.55	1.69	16.25	10.24	0.15	4.36	5.34	4.98	0.22	0.22	6.69	16	163	145	48	42	6	9	12	144	24
TB4-23C	56.5336	24.0159	Felsic Geotimes	Pillow flow	Spilite	63.24	1.42	14.96	7.59	0.09	3.89	1.8	6.56	0.12	0.33	2.4	29	73	198	60	83	22	8	<4	108	19
TB2-50c	57.3809	23.5996	Felsic Geotimes	Pillow flow	Spilite	59.79	1.67	14.72	10.46	0.12	3.46	3.76	5.61	0.11	0.3	3.57	26	95	172	57	98	18	0	<4	170	21
RaM-004	56.3806	24.6903	Geotimes	Pillow flow	Spilite	55.53	1.31	14.04	11.36	0.26	4.6	6.66	5.71	0.39	0.14	5.45	17	75	84	32	89	59	10	<4	320	39
SG13-36A	56.3285	24.772	Geotimes	Massive flow	Spilite	51.13	1.02	15.22	10.06	0.16	7.46	10.58	4.16	0.11	0.09	3.97	<12	95	68	27	78	65	52	75	274	37
SG14-44	56.3308	24.7676	Geotimes	Massive flow	Spilite	50.26	1.04	15.09	10.76	0.17	5.99	11.76	4.78	0.05	0.09	4.3	<12	71	64	29	72	40	37	75	303	44
SG14-57	56.3268	24.7692	Geotimes	Pillow flow	Spilite	56.46	1.93	13.07	12.88	0.17	3.43	6.59	5.24	0.03	0.18	2.48	<12	64	139	49	83	24	6	13	365	31
SP18-A1	56.3526	24.2578	Geotimes	Pillow flow	Spilite	58.01	1.02	15.33	9.23	0.14	6.15	4.58	4.91	0.51	0.1	4.59	59	102	64	23	84	70	16	<4	278	28
SP18-A3	56.3531	24.2581	Geotimes	Pillow flow	Spilite	55.04	1.95	14.39	12.5	0.16	4.38	4.77	6.44	0.19	0.19	2.74	34	59	124	41	93	27	1	<4	379	28
SP18-B3	56.5263	24.1122	Geotimes	Pillow flow	Spilite	52.76	1.62	16.39	10.9	0.16	3.67	8	6.28	0.07	0.16	3.56	20	114	102	36	75	22	11	18	349	27
SP18-B5	56.5362	24.1134	Geotimes	Pillow flow	Spilite	55.83	1.9	15.65	11.01	0.18	2.2	5.33	7.53	0.16	0.21	2.25	44	97	141	46	92	22	1	<4	243	26
SP18-C5p	56.53	24.1707	Geotimes	Pillow flow	Spilite	57.47	1.63	14.77	11.35	0.21	3.68	4.36	6.32	0.04	0.17	4.45	19	44	114	36	95	13	6	<4	299	23
SP18-D11	56.373	24.4707	Geotimes	Pillow flow	Spilite	51.62	1.8	13.92	12.89	0.23	5.17	8.82	5.34	0.06	0.16	4.51	32	84	112	40	98	50	19	<4	377	36
SP18-D9	56.377	24.4721	Geotimes	Pillow flow	Spilite	51.99	1.63	15.16	10.71	0.18	5.57	9.15	5.35	0.1	0.16	3.76	26	95	112	37	116	49	32	20	323	33
TB3-05B	56.3207	24.8357	Geotimes	Pillow flow	Spilite	51.95	1.52	14.79	11.79	0.31	5.76	8.46	5.27	0.02	0.13	1.99	28	61	95	35	98	61	38	49	353	40
TB3-05C	56.3209	24.8332	Geotimes	Massive flow	Spilite	51.26	1.88	14.69	13.7	0.48	4.11	10.58	3.1	0.03	0.17	5.31	40	99	121	44	114	24	11	5	442	34
TB3-05D	56.3267	24.8463	Geotimes	Pillow flow	Spilite	50.23	1.73	14.3	12.25	0.21	5.47	10.29	5.24	0.12	0.17	4.63	22	97	129	41	94	50	20	30	311	40
TB3-07A2	56.4418	24.2797	Geotimes	Pillow flow	Spilite	51.74	2.07	15.67	14.07	0.2	4.79	6.59	4.13	0.56	0.19	6.33	40	199	124	42	124	17	9	<4	435	30
TB3-08A	56.35	24.7541	Geotimes	Pillow flow	Spilite	50.56	1.14	15.99	11.34	0.12	8.92	6.62	5.16	0.04	0.1	6.97	28	104	73	26	33	6	69	221	232	40
TB3-11F	56.374	24.4706	Geotimes	Pillow flow	Spilite	52.58	1.96	14.46	12.03	0.19	4.53	7.93	5.78	0.34	0.19	3.87	51	140	136	45	100	58	23	10	380	31
TB3-14B	56.5277	24.2256	Geotimes	Pillow flow	Spilite	58.37	2.11	13.36	11.76	0.15	4.04	3.81	4.42	1.78	0.19	4.11	98	102	128	41	86	34	10	<4	385	28
TB4-17C	56.4034	24.3363	Geotimes	Pillow flow	Spilite	50.36	1	17.72	8.46	0.19	7.02	9.57	5.22	0.32	0.14	8.15	57	246	77	27	77	47	48	118	224	33
TB4-18F	56.3186	24.8816	Geotimes	Pillow flow	Spilite	49.37	0.85	15.21	9.37	0.16	7.5	13.69	3.27	0.5	0.07	4.04	49	211	47	24	58	66	85	348	233	41
TB4-19C	57.175	23.774	Geotimes	Pillow flow	Spilite	51.21	1.3	17.98	7.54	0.14	7.52	8.31	5.74	0.15	0.12	9.18	39	135	78	22	68	65	86	236	156	46
WF-007	56.4389	24.5577	Geotimes	Pillow flow	Spilite	51.11	0.98	16.43	9.16	0.16	5.06	11.19	5.57	0.27	0.09	5.4	21	169	64	25	63	33	112	278	228	40
WF-009	56.4401	24.5588	Geotimes	Pillow flow	Spilite	49.09	1.01	18.03	9.83	0.18	5.37	12.95	3.33	0.13	0.1	4.49	16	181	65	26	71	56	119	340	217	36
YV15-04	56.3381	24.7806	Geotimes	Pillow flow	Spilite	55.13	1.19	15.34	10.56	0.21	3.77	7.05	6.57	0.04	0.14	6.74	38	54	75	30	82	10	11	<4	338	35
YV15-15	56.3709	24.7603	Geotimes	Pillow flow	Spilite	56.23	1.55	15.21	11.58	0.13	2.63	6.55	5.92	0.03	0.17	3.34	21	81	94	37	72	14	12	<4	322	31
AB16-4511	56.3317	24.8376	Geotimes	Pillow flow	Spilite	51.93	1.25	15.63	10.74	0.17	6.36	8.74	4.97	0.08	0.11	3.43	13	68	80	31	100	43	31	40	300	37
AB16-4512	56.3332	24.8373	Geotimes	Pillow flow	Spilite	49.97	0.93	15.91	9.42	0.16	8.99	11.47	2.95	0.13	0.06	3.03	19	130	50	24	121	90	121	359	233	37
AB16-4521	56.3564	24.8357	Geotimes	Pillow flow	Spilite	48.87	0.92	17.66	9.37	0.17	7.39	12.18	3.27	0.09	0.08	3.7	26	285	60	22	62	61	104	268	196	34
AB16-4571	56.3248	24.7864	Geotimes	Massive flow	Spilite	51.13	1.57	14.87	12.72	0.19	5.89	8.43	4.95	0.1	0.13	3.14	25	56	98	36	92	70	33	42	346	41
AB16-4592	56.3121	24.8203	Geotimes	Pillow flow	Spilite	52.17	1.49	15.13	11.25	0.21	5.63	9.6	4.09	0.3	0.13	6.78	30	174	91	35	89	50	42	39	356	39
AB16-4593	56.3135	24.8104	Geotimes	Pillow flow	Spilite	55.49	1.91	13.91	13.73	0.22	6.1	3.85	4.6	0.03	0.16	4.2	33	45	117	41	62	13	14	6	373	32
AB16-4671	56.3799	24.4707	Geotimes	Pillow flow	Spilite	60.47	1.73	12.8	10.46	0.16	2.85	5.8	5.45	0.1	0.18	5.92	24	84	120	40	135	26	7	<4	339	26
LD10-1204	56.4495	24.5566	Geotimes	Massive flow	Spilite	54.73	1.47	15.69	11.91	0.42	5.75	5.59	4.29	0.02	0.13	3.48	13	101	87	33	133	56	5	<4	359	36
LD10-1231	56.3741	24.4705	Geotimes	Pillow flow	Spilite	50.74	1.8	14.54	11.61	0.19	4.94	10.82	5.05	0.13	0.18	4.51	22	108	124	42	88	57	46	68	352	34
LD10-1241	56.3856	24.4577	Geotimes	Pillow flow	Spilite	52.29	2	16	12.78	0.17	3.74	7.1	5.12	0.57	0.22	4.16	38	248	130	43	105	39	11	<4	359	32
TB2-32B	56.444	24.274	Geotimes	Massive flow	Spilite	53.77	1.96	15.4	12.54	0.12	4.51	5.48	5.88	0.16	0.18	3.97	25	100	123	49	46	15	10	7	409	30
TB2-39C	56.3584	24.6901	Geotimes	Massive flow	Spilite	54.16	1.46	16.17	12.28	0.24	6.1	5.05	4.17	0.24	0.13	3.61	37	156	96	33	77	104	5	<4	339	29
TB2-45C	56.3822	24.6882	Geotimes	Pillow flow	Spilite	58.27	1.31	14.64	10.71	0.14	3.96	4.34	6.18	0.33	0.13	4.12	41	108	84	29	94	15	4	<4	341	32
TB4-06C	56.4385	24.2765	Geotimes	Pillow flow	Spilite	52.6	2.03	15.26	13.93	0.13	3.85	6.57	5.31	0.13	0.19	3.73	17	83	126	43	45	10	8	<4	399	27
TB4-15B	56.8781	23.8589	Geotimes	Pillow flow	Spilite	50.98	1.8	14.99	10.7	0.21	5.56	10.5	4.91	0.16	0.18	4.11	22	213	123	39	90	29	39	68	317	40
TB4-18B	56.3259	24.8953	Geotimes	Pillow flow	Spilite	56.85	1.77	15.2	10.71	0.12	3.67	4.42	7.02	0.06	0.19	1.96	18	61	131	43	40	6	7	<4	257	27
TB4-20C	56.4933	23.7072	Geotimes	Pillow flow	Spilite	58.47	1.28	14.36	11.05	0.24	4.57	5.53	4.16	0.23	0.13	2.01	37	144	80	31	91	27	3	<4	244	30
TB4-20N	56.6248	23.6216	Geotimes	Massive flow	Spilite	54.17	1.58	18.14	9.94	1.54	5.41	1.7	6.97	0.31	0.23	3.49	95	404	77	41	152	26	13	5	261	30
AB16-4472	56.3748	24.5019	Geotimes	Massive flow	Spilite	55.99	1.67	15.21	8.62	0.18	2.65	9.95	4.86	0.73	0.14	7.36	127	502	92	31	96	16	6	<4	349	27
AB16-4483	56.3725	24.501	Geotimes	Pillow flow	Spilite	60.77	1.62	13.18	9.76	0.14	2.59	5.99	5.72	0.06	0.18	4.29	29	69	99	36	69	13	2	<4	312	23
AB16-4492	56.3435	24.8728	Geotimes	Pillow flow	Spilite	52.96	1.64	14.26	12.21	0.19	5.8	7.94	4.81	0.03	0.15	9.45	25	81	108	36	72	10	20	10	323	40
AB16-4583	56.3097	24.8075	Geotimes	Pillow flow	Spilite	51.45	1.18	16.72	11.41	0.4	6.48	6.23	6	0.05	0.1	4.64	24	120	74	29	55	12	30	<4	303	40
TB2-40B	56.3616	24.6915	Geotimes	Massive flow	Spilite	48.19	0.95	17.58	9.09	0.16	8.46	12.8	2.64	0.05	0.08	3.39	28	194	62	23	61	87	155	314	210	38
TB3-20C	56.3475	24.8144	Geotimes	Pillow flow	Spilite	50.8	1.28	14.11	10.66	0.18	4.99	12.92	4.85	0.12	0.11	4.19	31	161	82	30	90	22	38	98	304	43
TB3-20D	56.335	24.8255	Geotimes	Pillow flow	Spilite	51.26	1.06	16.3	9.52	0.17	7.45	9.66	4.46	0.03	0.09	3.67	20	110	74	24	56	53	56	246	237	36
TB3-20I	56.3556	24.8591	Geotimes	Pillow flow	Carbonated	50.65	2.67	18.71	12.42	0.18	1.25	13.76	0.01	0.07	0.28	15.72	43	57	182	58	84	25	33	166	475	58
TB3-26A	56.4844	23.6748	Geotimes	Pillow flow	Spilite	52.01	1.33	15.89	11.54	0.17	5.76	6.38	6.62	0.16	0.14	5.59	37	214	77	31	89	29	4	<4	321	33
TB3M8D	56.5225	24.1253	Geotimes	Pillow flow	Spilite	56.39	1.36	14.75	8.93	0.16	5.64	6.83	5.72	0.07	0.15	3.6	11	46	73	24	50	99	50	122	247	34
SW16-23	56.3629	24.6876	Transitional Geotimes-Lasail	Pillow flow	Spilite	58.43	1.09	13.91	10.76	0.15	7.23	6.06	2.2	0.06	0.1	5.42	7	149	68	26	124	9	13	<4	297	32
YV15-02	56.3111	24.8109	Transitional Geotimes-Lasail	Pillow flow	Spilite	52.63	1.12	16.09	10.88	0.1	7.11	6.53	5.36	0.08	0.1	3.22	23	136	68	26	20	6	26	12	284	38
TB2-39B	56.3597	24.6898	Transitional Geotimes-Lasail	Pillow flow	Spilite	49.31	0.85	16.8	9.39	0.15	9.12	11.15	3.04	0.13	0.06	3.54	26	172	49	22	66	60	117	247	233	42
TB2-40A	56.3617	24.6933	Transitional Geotimes-Lasail	Pillow flow	Spilite	49.63	0.8	17.05	9.29	0.19	8.2	10.87	3.65	0.27	0.06	3.86	35	172	48	20	60	8	119	332	212	37
YV15-14	56.3671	24.7514	Transitional Geotimes-Lasail	Pillow flow	Spilite	53.09	0.99	15.69	9.97	0.19	6.81	7.56	5.55	0.06	0.09	3.25	24	87	64	24	82	70	87	264	255	39
TB4-17F	56.4034	24.3541	Lasail	Pillow flow	Spilite	50.62	0.52	14.55	7.63	0.41	8.37	12.82	4.86	0.18	0.05	8.96	28	166	23	12	69	112	144	395	224	41
RaM-002	56.3783	24.6925	Lasail	Pillow flow	Spilite	56.77	0.72	14.72	9.89	0.18	7.07	6.05	4.53	0.02	0.06	3.32	5	71	36	21	89	71	23	8	260	39
TB3-08B	56.3586	24.7346	Lasail	Pillow flow	Spilite	56.54	0.59	15.54	7.18	0.14	6.84	7.75	5.33	0.04	0.05	5.4	4	69	28	13	38	89	46	92	241	35
TB3-19B	56.4551	24.554	Lasail	Pillow flow	Spilite	56.51	0.92	13.17	9.5	0.19	4.19	15.33	0.09	0.02	0.08	2.49	8	211	58	21	31	12	28	39	305	35
TB4-10D	56.4352	24.6274	Lasail	Pillow flow	Spilite	54.78	0.92	14.6	8.62	0.16	6.45	9.26	5.04	0.08	0.09	3.08	56	148	57	20	61	232	111	253	224	38
YV15-08	56.341	24.7814	Lasail	Pillow flow	Spilite	51.43	0.99	15.13	9.15	0.19	5.02	13.66	4.29	0.05	0.09	5.57	39	64	61	26	59	43	34	27	324	38
YV15-17	56.3355	24.7143	Lasail	Pillow flow	Chloritised	66.83	0.82	13.07	6.75	0.14	4.25	4.83	3.19	0.01	0.09	3.32	15	84	53	19	67	5	35	24	150	24
YV15-22	56.4358	24.5907	Lasail	Pillow flow	Spilite	52.64	0.68	15.74	9.77	0.16	7.61	7.67	5.62	0.08	0.04	4.18	27	88	33	18	73	13	39	44	281	43
AB16-4601	56.4433	24.6343	Lasail	Pillow flow	Spilite	52.41	0.76	14.5	9.33	0.16	9.84	9.47	3.28	0.2	0.05	3.25	43	162	40	19	59	64	151	384	245	36
LD10-1211	56.4509	24.5603	Lasail	Pillow flow	Spilite	57.1	0.7	14.7	7.47	0.17	6.93	8.21	4.65	0.02	0.06	2.8	9	70	41	17	54	206	43	84	234	35
TB2-33A	56.4249	24.2596	Lasail	Massive flow	Spilite	55.3	0.69	15.18	10.51	0.24	6.91	7.42	1.96	1.75	0.05	6.48	44	200	38	17	54	75	27	16	292	41
TB2-35c	56.3684	24.6712	Lasail	Pillow flow	Spilite	51.74	0.92	15.64	8.69	0.15	5.76	12.75	4.19	0.07	0.08	4.48	37	48	60	21	56	35	40	52	280	40
TB2-39A	56.3642	24.6884	Lasail	Massive flow	Spilite	50.9	0.86	15.58	9.57	0.2	8.92	10.06	3.59	0.26	0.07	5.27	43	156	50	21	69	64	60	119	256	43
AB16-4602	56.458	24.6151	Lasail	Pillow flow	Spilite	52.92	0.73	16.77	8.13	0.14	6.35	9.89	4.93	0.05	0.07	4.68	20	99	46	19	61	54	60	184	303	36
LD10-1221	56.4548	24.5631	Lasail	Pillow flow	Epidotised	49	0.65	17.18	9.95	0.19	4.34	16.87	1.76	0.03	0.05	2.9	24	164	38	18	36	29	38	77	351	39
TB2-38A	56.3859	24.7485	Lasail	Massive flow	Spilite	52.14	0.66	15.59	8.37	0.18	6.66	11.53	4.79	0.03	0.05	9.09	28	42	38	16	56	17	57	144	240	40
TB3-15L	56.5365	24.0412	Lasail	Pillow flow	Spilite	50.99	0.81	15.57	8.55	0.15	7.51	12.44	3.78	0.14	0.06	3.97	21	45	44	21	58	84	64	188	258	37
TB3-17L	56.8891	23.8289	Lasail	Pillow flow	Spilite	60.48	0.48	12.81	6.13	0.13	7.04	8.22	4.63	0.03	0.05	2.14	19	95	29	14	34	136	85	284	215	32
YV15-26	56.3735	24.5106	Lasail	Pillow flow	Spilite	53.32	0.57	15.56	8.06	0.14	7.14	11.01	4.1	0.06	0.05	4.56	29	78	32	16	58	64	83	255	264	38
TB3-09B	56.3594	24.7262	Lasail	Pillow flow	Spilite	54.65	1.01	15.74	9.31	0.16	6.09	6.81	6.09	0.05	0.1	2.97	21	100	64	23	47	56	24	5	302	35
SP18-A9	56.357	24.262	Transitional Alley	Pillow flow	Spilite	56.13	0.55	16.14	7.46	0.13	6.33	7.11	6.05	0.05	0.05	3.62	41	92	38	17	49	57	54	179	254	32
WR-004	56.3714	24.6251	Transitional Alley	Pillow flow	Spilite	65.8	0.59	13.74	7.23	0.11	4.31	3.88	4.23	0.03	0.06	3.33	13	36	53	22	69	26	47	27	198	30
TB4-19A	57.1484	23.7819	Transitional Alley	Massive flow	Spilite	53.38	0.53	14.85	8.72	0.1	14.37	4.08	2.74	1.19	0.04	6.59	67	242	23	11	67	46	267	410	207	38
TB3-15C	56.5537	24.1448	Transitional Alley	Massive flow	Spilite	69.04	0.66	11.82	8.15	0.07	0.82	2.58	6.7	0.09	0.07	1.91	37	47	49	13	25	23	30	300	33	36
SP18-B9	56.5487	24.1129	Tholeiitic Alley	Pillow flow	Spilite	53.95	0.69	17.83	8.36	0.17	4.21	9.74	4.73	0.15	0.18	4.67	67	316	49	31	70	50	43	24	331	27
SP18-C13	56.5427	24.1743	Tholeiitic Alley	Pillow flow	Spilite	59.83	0.74	16.07	7.74	0.14	3.46	7.85	3	1.1	0.08	6.63	50	270	53	23	69	27	33	31	288	34
SP18-C16	56.5484	24.1798	Tholeiitic Alley	Pillow flow	Spilite	56.83	0.6	16.02	7.32	0.2	5.01	9	4.72	0.23	0.07	8.17	318	324	43	19	69	109	53	90	249	37
SP18-C7	56.5322	24.1718	Tholeiitic Alley	Pillow flow	Spilite	56.99	1	15.82	9.45	0.14	6.25	4.88	4.86	0.52	0.09	4.52	72	118	63	23	75	72	15	<4	297	28
SP18-C8	56.5335	24.1717	Tholeiitic Alley	Pillow flow	Spilite	52.97	0.57	14.5	7.97	0.26	8.17	8.69	3.39	3.44	0.04	6.04	402	189	31	16	64	123	79	236	239	43
SP18-D3	56.3916	24.4738	Tholeiitic Alley	Pillow flow	Spilite	46.49	0.63	16.69	8.32	0.18	3.11	18	6.03	0.47	0.07	15.37	43	139	34	18	70	104	59	155	309	43
SP18-D5	56.3876	24.471	Tholeiitic Alley	Pillow flow	Spilite	50.84	0.62	17.42	9.2	0.14	6.38	10.42	4.66	0.26	0.07	6.36	33	295	35	19	84	44	39	57	288	39
TB3-10A	56.36	24.5924	Tholeiitic Alley	Pillow flow	Spilite	58.09	0.87	13.84	8.11	0.12	2.15	16.18	0.55	0.02	0.08	3.98	18	34	44	19	39	7	12	5	447	28
TB3-10C	56.4155	24.4451	Tholeiitic Alley	Pillow flow	Spilite	62.4	0.94	13.49	8.82	0.13	2.34	6.01	5.72	0.06	0.07	6.54	22	67	62	29	84	11	6	<4	357	29
TB3-13C	57.5576	23.517	Tholeiitic Alley	Massive flow	Spilite	62.4	0.92	15.09	9.21	0.13	3.23	2.75	6.12	0.05	0.09	3.17	17	137	68	24	90	59	13	3	310	27
TB3-20G	56.3267	24.8778	Tholeiitic Alley	Pillow flow	Spilite	52.98	0.82	14.69	9.2	0.16	9.87	8.17	3.78	0.27	0.07	4.77	91	226	52	20	62	9	143	357	238	41
TB3-23A	57.0516	23.7645	Tholeiitic Alley	Pillow flow	Spilite	51.81	0.86	17.47	9.75	0.18	4.64	9.38	5.46	0.37	0.08	5	49	417	53	18	66	20	87	198	248	33
TB3-25I	56.6006	23.6784	Tholeiitic Alley	Pillow flow	Pumpellyite	54.07	0.56	14.76	7.38	0.09	7.12	15.78	0.16	0.03	0.05	4.87	11	26	37	14	54	68	115	329	191	34
TB3-25J	56.6095	23.6671	Tholeiitic Alley	Massive flow	Spilite	54.82	1.01	13.27	20.62	0.07	9.83	0.26	0	0.04	0.09	6.19	29	17	67	29	68	11	20	28	256	24
TB4-07F	56.3905	24.4421	Tholeiitic Alley	Pillow flow	Spilite	54.5	0.6	14.3	8.57	0.13	5.87	9.92	5.23	0.85	0.05	7.56	92	152	28	14	51	72	31	25	235	39
TB4-12C	56.4655	24.6144	Tholeiitic Alley	Pillow flow	Spilite	55.64	0.9	16.73	10.03	0.21	7.09	4.37	4.59	0.36	0.07	5.28	114	278	44	26	90	35	29	38	269	33
TB4-15I	56.9111	23.8374	Tholeiitic Alley	Pillow flow	Spilite	60.86	0.57	14.62	10.32	0.19	7.73	1.02	4.57	0.08	0.05	4.41	12	52	40	18	159	7	14	<4	232	39
TB4-15J	56.9152	23.8519	Tholeiitic Alley	Massive flow	Spilite	64.58	0.6	13.81	8.75	0.2	2.26	4.8	4.24	0.71	0.04	1.73	83	186	32	18	83	71	5	<4	385	35
TB4-17G	56.4124	24.278	Tholeiitic Alley	Pillow flow	Spilite	61.73	1.02	14.8	9.43	0.16	2.77	4.66	5.07	0.28	0.09	3.01	152	147	38	21	93	38	8	2	293	33
TB4-19A	57.1484	23.7819	Tholeiitic Alley	Massive flow	Spilite	53.38	0.53	14.85	8.72	0.1	14.37	4.08	2.74	1.19	0.04	6.59	67	242	23	11	67	46	267	410	207	38
TB4-19F	57.1454	23.7426	Tholeiitic Alley	Massive flow	Spilite	56.69	0.53	16.83	9.45	0.11	3.23	7.67	5.28	0.18	0.05	6.88	89	163	29	16	64	55	45	7	234	40
TB4-19K	57.317	23.6147	Tholeiitic Alley	Pillow flow	Spilite	60.27	1.06	14.96	10.14	0.12	6.43	1.35	5.05	0.52	0.09	3.83	34	101	52	24	82	68	3	<4	354	35
YV15-03	56.3209	24.8136	Tholeiitic Alley	Pillow flow	Spilite	57.33	0.66	15.22	10.97	0.17	4.14	10.4	1.05	0.01	0.05	4.28	26	239	41	20	54	22	16	<4	383	34
YV15-21	56.3665	24.7403	Tholeiitic Alley	Pillow flow	Spilite	64.9	0.98	15.2	4.38	0.08	9.4	0.39	4.55	0.02	0.09	4.49	29	29	51	25	268	88	41	25	304	38
YV15-23	56.4488	24.5875	Tholeiitic Alley	Pillow flow	Spilite	60.96	0.8	14.31	11.72	0.19	4	2.38	5.48	0.12	0.05	3.2	34	114	37	20	97	88	5	<4	367	40
YV15-24	56.361	24.5495	Tholeiitic Alley	Pillow flow	Spilite	58.19	0.95	14.79	10.11	0.16	5.74	4.12	5.73	0.12	0.09	2.64	21	40	66	25	90	75	33	17	301	35
AB16-4611	56.4353	24.6081	Tholeiitic Alley	Pillow flow	Spilite	57.41	0.67	16.21	10.4	0.15	4.63	2.95	5.79	0.73	0.05	2.97	166	104	40	18	88	119	10	<4	327	35
TB2-32C	56.4388	24.263	Tholeiitic Alley	Pillow flow	Spilite	64.19	0.82	13.38	10.02	0.23	3.38	1.74	2.61	3.57	0.07	4.19	1051	59	46	20	96	117	8	<4	379	28
TB2-33B	56.4502	24.2521	Tholeiitic Alley	Massive flow	Spilite	59.37	0.62	15.17	9.53	0.12	3.87	5.14	5.35	0.79	0.05	2.79	73	222	34	16	81	49	24	6	304	39
TB2-35A	56.5023	24.3693	Tholeiitic Alley	Pillow flow	Spilite	56.41	0.84	14.88	13.15	0.32	5.62	2.66	4.61	1.45	0.05	4.95	60	81	41	20	161	54	8	<4	406	41
TB2-35B	56.3772	24.6733	Tholeiitic Alley	Pillow flow	Spilite	63.29	0.67	12.67	8.74	0.15	4.61	5.82	3.86	0.15	0.05	6.78	38	70	36	17	73	56	18	<4	254	34
TB2-35D	56.3713	24.6718	Tholeiitic Alley	Pillow flow	Spilite	57.93	1.24	15.39	11.6	0.13	4.58	3.86	5.04	0.13	0.1	9.57	38	148	68	28	112	74	12	<4	396	36
TB2-41C	56.3662	24.5749	Tholeiitic Alley	Massive flow	Spilite	57.79	1.19	15.43	11.57	0.13	5.55	4.82	3.39	0.07	0.08	4.39	35	122	54	24	95	72	4	<4	385	37
TB2-46A	56.3721	24.647	Tholeiitic Alley	Pillow flow	Spilite	67.09	1.04	13.37	8.12	0.13	1.68	1.87	6.34	0.21	0.14	2.12	39	98	82	32	67	11	6	<4	341	24
TB2-50D	57.3803	23.6029	Tholeiitic Alley	Pillow flow	Spilite	53.61	0.76	16.23	9.32	0.11	4.98	8.25	6.06	0.61	0.08	7.97	92	174	52	21	72	92	30	10	375	36
TB4-17B	56.4162	24.2724	Tholeiitic Alley	Pillow flow	Spilite	59.07	0.62	16.65	9.07	0.12	4.32	3.22	6.75	0.14	0.04	4.14	55	151	26	14	67	40	18	4	283	41
TB4-17J	56.3543	24.2619	Tholeiitic Alley	Pillow flow	Spilite	58.05	1.01	16.26	8.57	0.13	4.1	8.59	3.03	0.15	0.1	6.89	126	359	67	25	74	43	15	<4	263	30
YV15-13	56.3687	24.75	Tholeiitic Alley	Pillow flow	Spilite	54.44	0.64	15.27	8.92	0.26	7.47	8.67	4.1	0.18	0.05	9.38	24	76	33	16	76	5	54	109	242	41
TB2-31	56.435	24.2728	Tholeiitic Alley	Pillow flow	Spilite	55.41	0.78	15.67	11.02	0.23	6.58	7.12	1.43	1.71	0.06	7	89	297	46	20	121	22	22	10	289	36
TB2-31B	56.4336	24.2725	Tholeiitic Alley	Pillow flow	Spilite	53.79	0.66	16.21	10.06	0.2	7.89	8.36	1.89	0.89	0.05	6.65	33	746	31	16	114	392	34	29	306	40
TB2-31C	56.4321	24.2722	Tholeiitic Alley	Massive flow	Spilite	56.12	0.92	15.56	12.23	0.22	5.71	5.98	2.48	0.7	0.08	6.49	49	680	46	22	70	95	12	<4	338	42
TB2-33C	56.4303	24.2782	Tholeiitic Alley	Massive flow	Spilite	59	0.82	14.11	14.75	0.47	5.26	2.73	2.54	0.27	0.06	5.35	37	92	47	22	120	18	13	<4	386	35
TB2-33D	56.4303	24.2782	Tholeiitic Alley	Massive flow	Spilite	52.63	0.76	16.07	11	0.58	7.08	8.03	2.48	1.31	0.06	6.17	68	147	44	19	107	18	19	4	288	39
TB2-34D	56.4635	24.3189	Tholeiitic Alley	Massive flow	Spilite	60.69	0.99	14.98	10.11	0.12	3.07	5.26	3.94	0.75	0.09	4.89	96	210	74	31	84	157	7	<4	283	31
TB2-38B	56.3683	24.742	Tholeiitic Alley	Massive flow	Spilite	54.37	1.16	15.42	11.9	0.22	8.22	3.47	5.09	0.06	0.09	6.27	16	63	63	28	92	69	9	<4	355	41
TB2-41A	56.3837	24.6881	Tholeiitic Alley	Massive flow	Spilite	56.86	1.21	14.52	12.69	0.17	4.49	3.63	6.03	0.29	0.11	4.43	50	135	69	33	94	22	2	<4	385	40
TB3-14C	56.5319	24.2253	Tholeiitic Alley	Pillow flow	Spilite	49.58	0.6	16.52	8.94	0.36	5.96	15.37	1.98	0.65	0.04	8.73	30	150	35	18	67	32	66	253	268	40
TB3-14E	56.543	24.2367	Tholeiitic Alley	Massive flow	Spilite	57.07	0.83	15.78	8.83	0.18	4.83	5.09	6.57	0.73	0.08	2.7	103	198	59	23	72	34	39	36	292	35
TB3-14F	56.5492	24.193	Tholeiitic Alley	Pillow flow	Spilite	61.77	0.63	13.74	7.55	0.16	4.52	4.96	6.08	0.51	0.07	3.5	76	194	44	16	73	31	58	96	250	37
TB3-25G	56.5844	23.6648	Tholeiitic Alley	Pillow flow	Spilite	53.97	0.82	16.85	10.06	0.15	7.27	4.32	6.42	0.06	0.09	3.7	38	187	43	24	96	70	32	24	222	36
TB2-43C	56.4571	24.5582	Tholeiitic Alley	Sill	Spilite	59.19	0.76	15.59	10.86	0.14	3.27	3.85	5.85	0.21	0.05	2.59	32	136	41	19	76	63	5	<4	313	30
TB2-44D	56.4664	24.5362	Tholeiitic Alley	Sill	Spilite	58.12	0.74	15.45	10.8	0.16	3.24	6.42	3.94	0.62	0.05	2.36	102	111	42	19	90	74	6	<4	342	32
TB2-45A	56.4779	24.5396	Tholeiitic Alley	Sill	Spilite	58.84	0.75	15.23	10.71	0.22	3.9	4.32	5.08	0.16	0.05	2.71	51	134	38	18	87	26	3	<4	325	33
TB3-19A	56.4542	24.5629	Tholeiitic Alley	Sill	Spilite	60.27	0.81	14.61	10.67	0.16	3.02	5.08	4.54	0.04	0.06	2.99	18	82	50	23	100	65	1	<4	344	34
SP18-B7	56.5409	24.1164	Boninitic Alley	Sill	Spilite	55.76	0.39	14.98	7.94	0.2	8.34	7.28	4.93	0.14	0.03	3.88	48	118	21	12	50	82	71	277	244	39
TB3-25H	56.5852	23.6704	Tholeiitic Alley	Dyke	Spilite	55.46	0.86	15.06	10.32	0.16	6.44	8.53	2.1	1.08	0.06	4.2	35	374	43	21	41	13	19	<4	318	37
TB4-20L	56.6175	23.6575	Tholeiitic Alley	Dyke	Spilite	51.1	0.81	15.11	8.74	0.13	5.89	17.81	0.29	0.03	0.06	4.69	21	46	49	22	58	67	49	81	254	35

## Sheet: LA-ICP-MS_whole-rock
Sample ID	Longitude [˚E]	Latitude [˚N]	Original documentation	Lava unit	LOI	Sc	Sc 1 standard deviation	Cr	Cr 1 standard deviation	Ni	Ni 1 standard deviation	Cu	Cu 1 standard deviation	Zn	Zn 1 standard deviation	Ga	Ga 1 standard deviation	Ge	Ge 1 standard deviation	As	As 1 standard deviation	Rb	Rb 1 standard deviation	Sr	Sr 1 standard deviation	Y	Y 1 standard deviation	Zr	Zr 1 standard deviation	Nb	Nb 1 standard deviation	Ba	Ba 1 standard deviation	La	La 1 standard deviation	Ce	Ce 1 standard deviation	Pr	Pr 1 standard deviation	Nd	Nd 1 standard deviation	Sm	Sm 1 standard deviation	Eu	Eu 1 standard deviation	Gd	Gd 1 standard deviation	Tb	Tb 1 standard deviation
					wt%	µg/g	%	µg/g	%	µg/g	%	µg/g	%	µg/g	%	µg/g	%	µg/g	%	µg/g	%	µg/g	%	µg/g	%	µg/g	%	µg/g	%	µg/g	%	µg/g	%	µg/g	%	µg/g	%	µg/g	%	µg/g	%	µg/g	%	µg/g	%	µg/g	%	µg/g	%
AB16-4613	56.4252	24.6281	This Study	Boninitic Alley	4.24	34.6	1	125	1.6	58.3	1.5	100	2.7	49.7	3.4	10.8	1.2	0.898	8.7	0.226	6.5	7.82	0.6	253	1.5	9.21	2.9	15.5	9	0.273	5.8	57.9	1.9	0.517	6.2	1.61	5.4	0.27	4.2	1.64	4.6	0.741	10.1	0.302	8.5	1.14	8	0.211	4.2
SG14-28	56.3218	24.8138	This Study	Boninitic Alley	6.69	34.2	1.8	117	1.4	49.4	2.6	116	5.2	46.7	4.1	8.7	2.7	0.521	5.7	0.712	4.5	0.653	3.6	64.5	0.8	8.02	6.5	14.9	11.2	0.327	5.6	10.3	2.6	0.435	2.5	1.3	2.6	0.231	2.7	1.41	3.9	0.609	7	0.243	9.9	0.994	9.2	0.184	7.3
TB2-21A	56.3181	24.8075	This Study	Boninitic Alley	8.33	33.8	3	451	3.1	122	1.7	25.6	3.6	28.4	12.9	9.33	1.7	0.961	4	0.159	7.1	0.768	2.7	79.7	1.4	8.67	5.1	15.3	6.4	0.319	3.7	13.9	5.4	0.535	14.7	1.57	4.6	0.266	6.2	1.56	6.1	0.693	4.3	0.258	5.4	1.02	3.8	0.187	3.8
TB2-42A	56.365	24.5384	This Study	Boninitic Alley	4.44	39	2.6	569	3.8	213	3.7	89.7	7.1	63	6.7	9	4.1	0.893	12.9	0.675	4.1	2.13	4.3	144	2.4	9.18	4.1	20	4.3	1.82	6	35.6	2.1	1.47	8.6	3.01	5.9	0.383	5.4	1.88	5.5	0.692	7.2	0.234	4.1	1.04	6.5	0.195	6.5
TB2-42B	56.3727	24.5351	This Study	Boninitic Alley	3.21	40.3	3.4	295	1.6	62.4	4.4	147	2.3	37.5	6.6	7.49	2.4	0.81	6.4	0.751	6.9	0.862	2.9	74.2	1.3	8.91	7.5	13.9	6.1	0.505	1.3	9.11	2.4	0.536	7.6	1.55	3.1	0.24	5.3	1.37	6.2	0.57	9	0.213	6.6	1	11.1	0.187	6.2
TB2-42C	56.3727	24.5351	This Study	Boninitic Alley	3.01	39.9	2.4	334	1.6	65.8	2.9	258	4.1	42.4	9.4	7.77	2	1	4.8	0.949	3.3	0.293	4.8	31.7	2	8.24	2.2	12.6	2	0.465	2.1	7.01	1.6	0.558	5.5	1.63	10.2	0.245	4	1.32	4.2	0.559	4.8	0.198	8.9	0.88	6.7	0.177	2.4
TB2-44A	56.4615	24.5576	This Study	Boninitic Alley	2.62	44.6	1.9	378	1.3	90.5	2	99.7	1.2	45.3	4	9.83	0.9	1.09	8.5	0.536	4.1	2.87	2	117	0.9	8.1	4	10.9	3.3	0.257	5.2	20.1	2.2	0.369	4.9	1.03	3.3	0.176	4.6	1.1	3.8	0.513	4	0.215	5.4	0.92	2.9	0.167	4.4
TB2-45B	56.496	24.5294	This Study	Boninitic Alley	3.79	34.5	1.2	95	1.5	54.1	3.5	126	5.1	46.8	3.3	12	3.6	1.17	5.5	0.213	10.3	4.33	3.2	446	2.4	10.4	4.3	18.3	11.4	0.328	5.2	36.1	3.1	0.678	6.6	1.91	6.1	0.326	8.1	1.85	3	0.776	4.5	0.336	5	1.21	4.2	0.233	3.3
RAM010	56.3805	24.6891	Gilgen et al. (2016)	Depleted Lasail	3.83	33.1	1.6	353	6.6	124	2.7	7.86	10.4	31	4.8	9.41	2.8	0.879	7.7	0.124	10.2	0.198	9.4	93.7	1.1	9.44	2.8	16.2	2.1	0.186	5.4	6.15	3.1	0.573	7.6	1.77	4.8	0.309	3.8	1.84	4.8	0.76	12.4	0.315	6	1.23	2.6	0.218	4.9
SG14-08	56.3297	24.787	Gilgen et al. (2016)	Depleted Lasail	7.37	31.9	3.3	27	1.8	23.2	2.3	13	5.4	40.2	9.4	10.7	3.4	0.576	4.4	0.358	7.5	0.376	5.6	39.2	1.1	7	5.8	19.4	9.4	0.277	3	11.3	2.6	0.707	3.1	1.6	2.1	0.293	2.8	1.72	9.4	0.608	3.9	0.252	3.9	0.915	8.4	0.162	9.2
TB2-40D	56.3809	24.6885	This Study	Depleted Lasail	4.17	31.8	1.7	371	6.6	108	2.8	2	5.7	30	7.3	9.66	2.3	1.04	5.5	0.304	10.5	0.141	5.1	31.8	1	9.22	3	14.5	2.4	0.167	5.8	5.71	2.2	0.541	3.9	1.6	2.2	0.29	5.9	1.73	6	0.728	7.1	0.301	4.3	1.15	5.5	0.198	3.2
LD10-1241	56.3856	24.4577	This Study	Geotimes	4.16	28.1	0.6	15.2	4.8	16.4	4.5	32.2	1.2	85.7	4.7	17.1	1.7	1.35	5.6	0.326	7.9	12.8	1.5	237	1	34.1	0.8	108	1	3.05	2.4	18.1	1.9	5.34	1.1	15.8	1.6	2.42	1.6	12.6	2.4	4.01	2	1.52	2.9	5.23	1.4	0.869	2.5
TB2-39C	56.3584	24.6901	This Study	Geotimes	3.61	28.7	2.9	4.76	4	9.56	8.2	103	3.8	57.9	8.6	16.8	0.5	0.953	6.5	0.47	6.5	1.67	1	143	1.1	28.6	6	82.2	5.2	1.47	2.4	25.5	1.6	3.21	5.4	9.88	3.2	1.61	2.7	8.74	4.8	2.99	3.8	1.12	2.2	4.2	4.1	0.701	4.8
TB2-39B	56.3597	24.6898	This Study	Transitional Geotimes-Lasail	3.54	31.1	3	228	1.2	117	2	60.3	2.8	55.9	6.7	14	2	1.18	3.9	0.29	7.7	2.17	2.5	160	1	15.2	3.4	36.3	3.8	1.27	4.6	19.8	3	2.03	4.5	5.66	4.1	0.858	5.3	4.62	4.2	1.64	6	0.679	3.9	2.22	3.2	0.386	6.9
TB2-40B	56.3616	24.6915	This Study	Transitional Geotimes-Lasail	3.39	33	2.9	293	1.1	149	2.5	84.5	1.5	47.6	6.2	13.4	1.3	1.11	1.6	0.254	7.4	0.221	8	182	1.3	18	5.5	48.5	4.7	0.584	5	8.74	1.5	1.77	3.3	5.92	1.3	0.987	3.3	5.57	3.5	1.95	5.4	0.76	3.1	2.67	6.6	0.452	5.8
YV15-14	56.3671	24.7514	This Study	Transitional Geotimes-Lasail	3.25	35.8	4.1	244	1.9	82.2	1.7	69.6	2.4	54.8	6.9	12.5	1.8	1.39	5.9	0.346	7	0.451	3	77.7	0.6	18.6	6.7	49.4	5.3	1.38	1.4	7.31	2.9	2.28	4.2	6.71	4.7	1.11	2.8	5.88	1.9	2.02	5	0.796	2.7	2.78	5.5	0.47	4.9
AB16-4601	56.4433	24.6343	This Study	Lasail	3.25	35	3.9	374	3.2	148	1.3	66.5	2.1	47.5	4.1	10.5	1.2	1.1	4.4	0.314	2.8	1.36	2.2	150	1.2	14.4	5.5	30.5	5.2	0.302	6	30.6	1.5	1.02	2.5	3.69	1.8	0.654	2.3	3.88	4.3	1.46	3.2	0.61	2.8	2.05	6.3	0.361	7
AB16-4602	56.458	24.6151	This Study	Lasail	4.68	32.5	0.7	183	1	58.8	1.6	54.5	6	43.8	3.8	15.1	2.3	1.66	6.5	0.775	5.8	0.354	6.5	86	0.7	15.1	1.6	33.9	1.5	0.735	5.2	6.8	2.1	1.79	1	4.87	1	0.799	2.3	4.39	2	1.5	3.8	0.594	2.3	2.12	3.4	0.352	3.4
TB2-39A	56.3642	24.6884	This Study	Lasail	5.27	39.3	1	119	0.7	55.7	2.6	58.2	2.5	48	2.2	11.7	1.6	0.874	1.9	0.309	13.2	2.13	2	146	0.8	19	1	38.5	1.7	0.518	3.6	19.3	1.3	1.44	3	4.6	2.9	0.793	4.9	4.57	2.7	1.74	4.1	0.664	2.3	2.58	3.3	0.433	2
YV15-26	56.3735	24.5106	This Study	Lasail	4.56	31.8	1.6	225	5.1	77.6	2.4	68.8	1.2	47.2	3.6	15.1	1.7	1.62	4.9	0.563	3.1	0.459	3	73.3	2.4	12.1	2.1	20.7	1.5	0.335	5	6.26	14.1	1.01	2.1	2.94	1.1	0.492	3.8	2.76	3	1.07	2.5	0.43	7.5	1.53	4.8	0.274	3.7
TB2-31C	56.4321	24.2722	This Study	Tholeiitic Alley	6.49	32.6	2.9	7.06	7.2	14.3	5.6	68.9	6.3	56.9	5.1	11.9	3.8	0.94	7.2	0.365	6.4	3.26	3.1	606	2	16.6	5.5	39.2	3	0.78	2.5	27.1	1.8	1.47	12.6	4.87	9.6	0.804	6.9	4.44	4.4	1.69	6.2	0.608	4.1	2.35	3.9	0.402	4.9
TB2-33B	56.4502	24.2521	This Study	Tholeiitic Alley	2.79	37.4	3.1	17.7	4.9	23.2	5	43	2.5	60.4	8.3	10.2	2.8	1.07	0.2	0.265	5	14.5	9.4	214	0.8	15.8	6.8	28.4	10.8	0.351	2.6	56	1.6	1.06	4.5	2.97	4.7	0.498	5.2	2.96	3.9	1.19	6.5	0.475	4.3	1.99	5.8	0.369	7.3
TB2-33C	56.4303	24.2782	This Study	Tholeiitic Alley	5.35	34.5	1.5	11.9	3.6	14.9	2.8	7.36	32.7	84.6	5.7	11	2.1	0.64	9.3	0.071	26.7	1.08	3.7	89	2.6	19.1	3.5	36.6	4.2	0.584	4.5	22.9	1.7	1.39	6.7	3.89	7.4	0.646	4.9	3.71	7.8	1.48	3.9	0.495	5.7	2.34	4.9	0.426	4.9
TB2-34D	56.4635	24.3189	This Study	Tholeiitic Alley	4.89	27.6	0.8	6	7.4	10.5	2	152	2.6	57.2	3	13.8	1.1	1.47	3.3	1.43	2.7	11.9	1.6	193	1.4	27	2.7	62.7	8.9	1.14	2.1	78.7	2.1	2.48	4.5	7	4.6	1.13	4.5	6.45	3.4	2.37	7.4	0.835	5.5	3.47	4.9	0.617	6.2
TB2-35D	56.3713	24.6718	This Study	Tholeiitic Alley	9.57	29.7	1.4	9.68	5.6	14	4.9	63.7	2.1	90.1	4.6	12.5	0.7	0.601	12	2.67	12.2	1.46	1.7	131	1	20.3	2	49	1.9	0.97	2.9	27	2.2	2	3.2	6.19	1.5	1	2	5.57	3	2.01	3.3	0.758	5.4	2.76	2.3	0.486	1.1
TB2-38B	56.3683	24.742	This Study	Tholeiitic Alley	6.27	36.6	3.6	4.3	13.6	11.9	4.6	59.7	2.8	61.2	7.2	14.6	3.6	0.943	4.2	0.054	14.1	0.284	8	58.8	1.4	22.3	2.9	50.4	4.3	1.11	3.3	5.52	2.9	2.17	2.3	6.37	1.8	1.06	1.3	5.97	2.2	2.17	4.9	0.821	2.9	3.14	1.7	0.526	2.2
TB2-41A	56.3837	24.6881	This Study	Tholeiitic Alley	4.43	34.9	1.3	2.97	13.8	6.85	9.1	17.2	2.9	73.4	2.8	15.3	1.9	1.08	8.1	0.172	12.4	1.58	2.4	124	1	27.6	1.9	55.2	1.8	0.745	3.8	16.8	2.8	2.41	3.3	7.46	3.2	1.27	3.6	7.34	4.4	2.76	4	1.03	2.5	3.85	2.8	0.677	3.5
TB2-41C	56.3662	24.5749	This Study	Tholeiitic Alley	4.39	33.5	2.3	5.76	9.7	7.33	7.4	60.8	2.6	73.4	5.6	14.8	2.4	0.855	6.4	0.863	4.6	0.451	4.1	109	1.3	20.2	1.7	43.9	3.1	0.822	2.1	18.1	2.4	1.73	1.9	5.12	2.7	0.858	2.8	4.83	2.3	1.85	2.8	0.696	3.8	2.73	2.7	0.475	3.5
TB2-46A	56.3721	24.647	This Study	Tholeiitic Alley	2.12	27.8	1.7	6.06	3.6	11.1	4.2	5.72	3.4	50.2	3.8	11.3	2.9	1.2	4.6	1.32	2.6	2.59	2.1	99	0.8	30.6	1.5	76.8	1.1	1.31	1.5	19.8	2.3	3.32	2.3	9.09	1.1	1.54	2.2	8.41	2.5	2.88	3	0.973	2.7	4.08	2.1	0.746	3.1
Means of 6 ablation spots, all mass fractions in µg/g, on a hydrous basis
*Sample RAM010 remasured from Gilgen et al. (2016)
Details on the pressed-powder-pellet laser ablation inductively coupled plasma mass spectrometry can be found in Peters & Pettke (2016)
[truncated: 22 more columns]

## Sheet: EMPA_volcanic_glasses
Sample	Longitude ˚E	Latitude ˚N	Sample type	Assigned Lava Unit	number of analyses	SiO2	SiO2 1 standard deviation	TiO2	TiO2 1 standard deviation	Al2O3	Al2O3 1 standard deviation	FeO	FeO 1 standard deviation	MnO	Mno 1 standard deviation	MgO	MgO 1 standard deviation	CaO	CaO 1 standard deviation	Na2O	Na2O 1 standard deviation	K2O	K2O 1 standard deviation	Cr2O3	Cr2O3 1 standard deviation	Sum	Sum 1 standard deviation
					number	wt%	%	wt%	%	wt%	%	wt%	%	wt%	%	wt%	%	wt%	%	wt%	%	wt%	%	wt%	%	wt%	%
TB4-06A	56.4243	24.2759	Fresh Glass	Felsic Alley	13	68.74	0.3	0.24	20	10.35	1.8	3.14	2.5	0.09	22.6	0.13	19.4	3.78	8.3	2.16	14.9	0.92	10.6	0.022	99	89.57	0.46
TB4-07E	56.4067	24.4676	Fresh Glass	Tholeiitic Alley	12	55.97	0.5	1.18	6.6	13.65	2.5	8.84	1.7	0.17	16.1	3.04	2.9	7.82	1.2	2.29	17.4	0.28	5.9	0.021	138	93.26	0.93
TB4-08D	56.3797	24.7472	Fresh Glass	Tholeiitic Alley	4	50.35	0.9	0.83	4.7	15.19	1.4	7.44	0.8	0.17	6.6	7.18	1.8	11.94	2	2.12	4.8	0.08	10.1	0.063	63	95.36	0.39
TB4-12A	56.4265	24.622	Fresh Glass	Transitional Alley	8	53.42	0.4	0.54	9.3	14.97	1.1	7.22	0.9	0.15	18	7.45	1.4	12.1	1.5	1.63	5.7	0.14	6.9	0.048	75	97.67	0.32
TB4-12B	56.4265	24.622	Fresh Glass	Transitional Alley	6	53.35	0.4	0.54	5.2	15.07	0.5	7.16	1.2	0.14	19.1	7.38	2.2	11.98	2.4	1.65	5.6	0.14	4.1	0.09	62	97.5	0.34
TB4-13B	56.552	24.1514	Fresh Glass	Boninitic Alley	9	51.81	1.2	0.3	11.2	13.88	1.7	6.54	3.4	0.13	24.1	7.44	0.9	11.38	1.3	0.77	5.8	0.17	6.8	0.032	81	92.44	1
TB4-16B	57.0216	23.8327	Fresh Glass	Tholeiitic Alley	7	53.24	1.3	0.54	6.2	14.95	0.7	7.43	1.2	0.15	12.7	7.05	1.3	11.84	1.7	1.62	6.5	0.15	8.4	0.04	87	97	0.7
TB4-19H	57.2962	23.6296	Fresh Glass	Boninitic Alley	10	53.37	0.4	0.3	15.5	14.27	3.8	7.25	2.8	0.15	14	7.48	2.4	12	1.6	0.8	7.8	0.2	5.5	0.05	70	95.86	0.88
TB4-19I	57.2939	23.6289	Fresh Glass	Boninitic Alley	10	53.45	0.6	0.29	8.5	14.02	3.1	7.39	0.7	0.16	17.7	7.6	1.4	12.36	1.5	0.79	9.6	0.19	3.7	0.06	96	96.3	0.54
TB5-40A	56.4257	24.6223	Fresh Glass	Transitional Alley	10	52.1	0.3	0.5	2.7	15.1	0.6	7.3	0.8	0	12	7.5	2.2	11.6	0.6	1.7	3.6	0.2	6.6	0.1	56.9	96.2	0.29
TB5-40B	56.4257	24.622	Fresh Glass	Transitional Alley	11	52.1	0.5	0.5	5.1	15.3	0.6	7.3	1.3	0	10	7.2	2.9	11.6	0.6	1.7	4.1	0.2	3.5	<0.02	B.D.	96.05	0.39

## Sheet: EMPA_cpx
Sample ID	Longitude ˚E	Latitude ˚N	Lava Unit	Analysis No.	SiO2	CaO	TiO2	Na2O	FeO	MgO	Cr2O3	Al2O3	MnO	Total	Mg #	Ti
					wt%	wt%	wt%	wt%	wt%	wt%	wt%	wt%	wt%	wt%	%	apfu
AB16-4613	56.4252	24.6281	Boninitic Alley	1	52.06	19.65	0.214	0.111	11.29	15.12	0.024	1.88	0.314	100.66	70.48	0.0058
AB16-4613	56.4252	24.6281	Boninitic Alley	2	52.51	19.69	0.234	0.147	10.01	15.91	0.027	1.91	0.246	100.68	73.91	0.0063
AB16-4613	56.4252	24.6281	Boninitic Alley	3	52.31	18.73	0.235	0.181	9.85	16.58	0.036	1.99	0.257	100.17	75	0.0064
AB16-4613	56.4252	24.6281	Boninitic Alley	4	52.18	19.08	0.236	0.148	9.54	16.67	0.047	2.03	0.238	100.17	75.7	0.0064
AB16-4613	56.4252	24.6281	Boninitic Alley	5	52.37	19.71	0.211	0.154	9.16	16.13	0.058	1.87	0.223	99.89	75.84	0.0057
AB16-4613	56.4252	24.6281	Boninitic Alley	6	52.54	19.29	0.217	0.179	9.21	16.52	0.045	1.83	0.249	100.08	76.17	0.0059
AB16-4613	56.4252	24.6281	Boninitic Alley	7	52.19	20.29	0.356	0.144	8.51	15.61	0.064	3.09	0.223	100.48	76.58	0.0095
AB16-4613	56.4252	24.6281	Boninitic Alley	8	52.16	20.22	0.346	0.163	8.47	15.61	0.08	3.06	0.186	100.3	76.66	0.0092
AB16-4613	56.4252	24.6281	Boninitic Alley	9	52.06	20.14	0.334	0.275	8.5	15.89	0.072	3.06	0.209	100.54	76.92	0.0089
AB16-4613	56.4252	24.6281	Boninitic Alley	10	52.75	20.15	0.228	0.185	8.55	16.57	0.043	1.96	0.226	100.66	77.55	0.0061
AB16-4613	56.4252	24.6281	Boninitic Alley	11	52.74	20.1	0.249	0.125	8.15	16.51	0.112	2.28	0.21	100.48	78.31	0.0067
AB16-4613	56.4252	24.6281	Boninitic Alley	12	52.43	20.51	0.253	0.097	8.01	16.43	0.087	2.49	0.209	100.52	78.52	0.0068
AB16-4613	56.4252	24.6281	Boninitic Alley	13	52.82	20.31	0.229	0.083	7.79	16.59	0.103	2.18	0.221	100.33	79.15	0.0062
AB16-4613	56.4252	24.6281	Boninitic Alley	14	52.79	19.91	0.285	0.071	6.55	17.2	0.135	3.27	0.196	100.41	82.4	0.0075
AB16-4613	56.4252	24.6281	Boninitic Alley	15	53.12	19.31	0.183	0.052	6.2	17.88	0.234	3.16	0.177	100.32	83.71	0.0048
AB16-4613	56.4252	24.6281	Boninitic Alley	16	53.15	18.69	0.197	0.12	6.34	18.59	0.252	3.02	0.201	100.56	83.94	0.0052
AB16-4613	56.4252	24.6281	Boninitic Alley	17	53.83	18.69	0.124	0.102	6.14	18.74	0.311	2.33	0.192	100.46	84.47	0.0033
AB16-4613	56.4252	24.6281	Boninitic Alley	18	54.75	18.58	0.111	0.023	6.1	19.42	0.151	1.39	0.194	100.72	85.02	0.003
AB16-4613	56.4252	24.6281	Boninitic Alley	19	53.14	20.44	0.169	0.067	5.45	17.47	0.45	3.49	0.164	100.84	85.11	0.0044
AB16-4613	56.4252	24.6281	Boninitic Alley	20	52.48	20.84	0.181	0.128	5.44	17.48	0.39	3.14	0.148	100.23	85.14	0.0048
AB16-4613	56.4252	24.6281	Boninitic Alley	21	53.53	20.85	0.145	0.097	5.24	17.59	0.359	2.13	0.156	100.1	85.68	0.0039
AB16-4613	56.4252	24.6281	Boninitic Alley	22	53.58	20.78	0.156	0.099	5.24	17.62	0.413	2.34	0.14	100.37	85.7	0.0041
AB16-4613	56.4252	24.6281	Boninitic Alley	23	52.88	20.93	0.147	0.05	5.17	17.76	0.482	2.39	0.159	99.97	85.96	0.0039
AB16-4613	56.4252	24.6281	Boninitic Alley	24	53.57	20.93	0.137	0.089	5.08	17.85	0.421	2.42	0.159	100.66	86.23	0.0036
AB16-4613	56.4252	24.6281	Boninitic Alley	25	53.17	20.22	0.111	0.045	5.24	18.43	0.449	2.08	0.152	99.9	86.24	0.003
AB16-4613	56.4252	24.6281	Boninitic Alley	26	53.05	19.2	0.152	0.119	5.4	19.11	0.194	2.12	0.176	99.52	86.32	0.004
AB16-4613	56.4252	24.6281	Boninitic Alley	27	53.07	21.31	0.106	0.126	4.99	17.69	0.388	2.01	0.152	99.84	86.34	0.0028
AB16-4613	56.4252	24.6281	Boninitic Alley	28	54.53	19.88	0.115	0.026	5.08	18.69	0.251	1.49	0.159	100.22	86.77	0.0031
AB16-4613	56.4252	24.6281	Boninitic Alley	29	53.49	21.19	0.129	0.127	4.81	17.89	0.394	2.16	0.144	100.33	86.89	0.0034
AB16-4613	56.4252	24.6281	Boninitic Alley	30	53.31	20.84	0.136	0.159	4.87	18.19	0.402	2.71	0.157	100.77	86.94	0.0036
AB16-4613	56.4252	24.6281	Boninitic Alley	31	53.77	21.45	0.124	0.109	4.74	17.87	0.465	2.2	0.149	100.88	87.05	0.0033
AB16-4613	56.4252	24.6281	Boninitic Alley	32	53.51	21.47	0.109	0.112	4.37	17.85	0.674	2.63	0.128	100.85	87.92	0.0029
AB16-4613	56.4252	24.6281	Boninitic Alley	33	53.57	20.8	0.118	0.12	4.39	18.18	0.661	2.61	0.143	100.59	88.07	0.0031
AB16-4613	56.4252	24.6281	Boninitic Alley	34	53.87	21.18	0.109	0.131	4.3	18.08	0.611	2.47	0.12	100.87	88.23	0.0029
AB16-4613	56.4252	24.6281	Boninitic Alley	35	53.25	21.58	0.11	0.119	4.19	17.97	0.56	2.43	0.126	100.34	88.43	0.0029
AB16-4613	56.4252	24.6281	Boninitic Alley	36	53.44	21.51	0.098	0.041	4.18	17.97	0.656	2.46	0.128	100.48	88.46	0.0026
AB16-4613	56.4252	24.6281	Boninitic Alley	37	53.98	21.07	0.085	0.096	4.23	18.28	0.51	2.18	0.143	100.57	88.51	0.0023
AB16-4613	56.4252	24.6281	Boninitic Alley	38	54.15	20.88	0.084	0.047	4.23	18.41	0.485	2.05	0.16	100.5	88.58	0.0022
AB16-4613	56.4252	24.6281	Boninitic Alley	39	52.61	21.06	0.096	0.132	4.17	18.23	1.022	2.51	0.129	99.96	88.63	0.0025
AB16-4613	56.4252	24.6281	Boninitic Alley	40	53.04	21.67	0.088	0.099	3.86	17.85	0.709	2.13	0.119	99.57	89.18	0.0023
AB16-4613	56.4252	24.6281	Boninitic Alley	41	54.21	21.7	0.05	0.133	3.37	18.5	0.78	1.85	0.134	100.73	90.73	0.0013
LD10-1461	56.3665	24.3367	Boninitic Alley	1	52.23	19.59	0.248	0.14	9.24	16.06	0.037	1.78	0.209	99.53	75.6	0.0068
LD10-1461	56.3665	24.3367	Boninitic Alley	2	52.95	17.53	0.253	0.114	6.06	19.57	0.128	2.9	0.159	99.66	85.2	0.0067
LD10-1461	56.3665	24.3367	Boninitic Alley	3	53.19	18.18	0.198	0.129	6.02	19.55	0.16	2.53	0.139	100.1	85.27	0.0052
LD10-1461	56.3665	24.3367	Boninitic Alley	4	53.27	19.58	0.214	0.166	5.13	18.93	0.321	2.32	0.149	100.08	86.8	0.0057
LD10-1461	56.3665	24.3367	Boninitic Alley	5	52.88	20.5	0.238	0.122	4.88	18.06	0.365	2.62	0.126	99.79	86.84	0.0063
LD10-1461	56.3665	24.3367	Boninitic Alley	6	52.97	22.01	0.246	0.152	4.59	17.36	0.198	2.48	0.11	100.12	87.08	0.0065
LD10-1461	56.3665	24.3367	Boninitic Alley	7	54.04	19.91	0.16	0.168	4.77	19.15	0.518	2.15	0.145	101.01	87.74	0.0042
LD10-1461	56.3665	24.3367	Boninitic Alley	8	54.1	18.03	0.123	0.143	5.05	20.67	0.499	1.54	0.147	100.3	87.95	0.0032
LD10-1461	56.3665	24.3367	Boninitic Alley	9	52.3	21.07	0.147	0.185	4.35	18.04	0.747	2.34	0.128	99.31	88.08	0.0039
LD10-1461	56.3665	24.3367	Boninitic Alley	10	53.43	21.01	0.161	0.149	4.41	18.36	0.378	2.36	0.129	100.39	88.12	0.0043
LD10-1461	56.3665	24.3367	Boninitic Alley	11	52.75	21.23	0.145	0.2	4.25	18.13	0.677	2.19	0.128	99.7	88.38	0.0038
LD10-1461	56.3665	24.3367	Boninitic Alley	12	53.08	21.93	0.144	0.182	4.13	17.76	0.437	1.84	0.103	99.61	88.46	0.0039
LD10-1461	56.3665	24.3367	Boninitic Alley	13	52.56	21.16	0.144	0.199	4.23	18.26	0.692	2.15	0.132	99.53	88.5	0.0038
LD10-1461	56.3665	24.3367	Boninitic Alley	14	52.89	21.84	0.131	0.159	4.12	17.95	0.548	1.9	0.122	99.66	88.59	0.0035
LD10-1461	56.3665	24.3367	Boninitic Alley	15	54.1	19.88	0.121	0.158	4.4	19.26	0.7	1.46	0.14	100.22	88.64	0.0032
LD10-1461	56.3665	24.3367	Boninitic Alley	16	53.45	20.28	0.117	0.168	4.35	19.16	0.61	1.72	0.125	99.98	88.7	0.0031
LD10-1461	56.3665	24.3367	Boninitic Alley	17	53.2	21.35	0.143	0.154	4.09	18.17	0.859	2.05	0.118	100.13	88.79	0.0038
LD10-1461	56.3665	24.3367	Boninitic Alley	18	54.01	19.46	0.094	0.157	4.44	19.89	0.477	1.07	0.131	99.73	88.87	0.0025
LD10-1461	56.3665	24.3367	Boninitic Alley	19	53.84	19.73	0.113	0.154	4.3	19.3	0.61	1.6	0.147	99.79	88.89	0.003
LD10-1461	56.3665	24.3367	Boninitic Alley	20	53.47	19.86	0.112	0.145	4.36	19.77	0.591	1.37	0.138	99.82	88.99	0.003
LD10-1461	56.3665	24.3367	Boninitic Alley	21	53.87	20.33	0.134	0.164	4.18	19.28	0.617	1.41	0.124	100.11	89.16	0.0036
LD10-1461	56.3665	24.3367	Boninitic Alley	22	53.92	20.24	0.079	0.156	4.18	19.35	0.653	1.44	0.131	100.15	89.19	0.0021
LD10-1461	56.3665	24.3367	Boninitic Alley	23	53.55	20.6	0.113	0.15	4.1	19.03	0.578	1.55	0.119	99.79	89.22	0.003
LD10-1461	56.3665	24.3367	Boninitic Alley	24	53.88	20.68	0.104	0.163	4.05	18.93	0.652	1.55	0.138	100.15	89.28	0.0028
LD10-1461	56.3665	24.3367	Boninitic Alley	25	53.53	21.38	0.14	0.165	3.91	18.29	0.7	1.83	0.127	100.07	89.29	0.0037
LD10-1461	56.3665	24.3367	Boninitic Alley	26	53.97	20.56	0.106	0.134	4.03	19.19	0.619	1.28	0.119	100.01	89.46	0.0028
LD10-1461	56.3665	24.3367	Boninitic Alley	27	53.81	20.87	0.119	0.188	3.96	18.92	0.676	1.61	0.115	100.27	89.49	0.0032
LD10-1461	56.3665	24.3367	Boninitic Alley	28	53.59	20.53	0.094	0.173	4.05	19.38	0.609	1.31	0.122	99.86	89.51	0.0025
LD10-1461	56.3665	24.3367	Boninitic Alley	29	54.03	20.62	0.117	0.164	3.94	19.02	0.662	1.68	0.132	100.37	89.59	0.0031
LD10-1461	56.3665	24.3367	Boninitic Alley	30	53.1	21.01	0.121	0.177	3.86	18.74	0.75	1.62	0.112	99.49	89.64	0.0032
LD10-1461	56.3665	24.3367	Boninitic Alley	31	53.78	20.84	0.13	0.171	3.89	18.91	0.712	1.55	0.113	100.1	89.65	0.0034
LD10-1461	56.3665	24.3367	Boninitic Alley	32	54.46	20.35	0.107	0.187	4.02	19.58	0.548	1.38	0.127	100.76	89.67	0.0028
LD10-1461	56.3665	24.3367	Boninitic Alley	33	53.74	21.22	0.104	0.153	3.78	18.65	0.604	1.59	0.131	99.97	89.79	0.0028
LD10-1461	56.3665	24.3367	Boninitic Alley	34	53.8	21.16	0.118	0.167	3.8	18.75	0.776	1.73	0.138	100.44	89.79	0.0031
LD10-1461	56.3665	24.3367	Boninitic Alley	35	53.87	21.06	0.132	0.174	3.75	18.6	0.758	1.62	0.105	100.07	89.84	0.0035
TB2-42A	56.365	24.5384	Boninitic Alley	1	52.62	19.25	0.2	0.077	6.8	18.07	0.324	1.45	0.201	98.99	82.57	0.0054
TB2-42A	56.365	24.5384	Boninitic Alley	2	52.31	19.83	0.155	0.036	6.27	17.05	0.34	3.05	0.169	99.21	82.9	0.0042
TB2-42A	56.365	24.5384	Boninitic Alley	3	52.8	21.68	0.215	0.122	5.94	16.74	0.24	1.39	0.149	99.28	83.4	0.0059
TB2-42A	56.365	24.5384	Boninitic Alley	4	52.51	20.83	0.18	0.098	5.75	16.58	0.409	3.06	0.145	99.56	83.71	0.0048
TB2-42A	56.365	24.5384	Boninitic Alley	5	52.76	20.75	0.204	0.058	5.95	17.46	0.466	1.45	0.156	99.25	83.95	0.0055
TB2-42A	56.365	24.5384	Boninitic Alley	6	52.93	21	0.133	0.071	5.85	17.53	0.266	1.15	0.177	99.11	84.23	0.0036
TB2-42A	56.365	24.5384	Boninitic Alley	7	53.16	20.56	0.14	0.018	5.98	18.04	0.326	1.17	0.167	99.56	84.32	0.0038
TB2-42A	56.365	24.5384	Boninitic Alley	8	52.88	20.52	0.145	0.065	5.87	17.75	0.543	1.28	0.162	99.22	84.35	0.004
TB2-42A	56.365	24.5384	Boninitic Alley	9	53.46	19.82	0.141	0.126	6.14	18.61	0.333	1.09	0.179	99.9	84.38	0.0038
TB2-42A	56.365	24.5384	Boninitic Alley	10	52.6	20.32	0.257	0.13	5.62	17.23	0.843	3.2	0.162	100.36	84.53	0.0068
TB2-42A	56.365	24.5384	Boninitic Alley	11	52.97	21.47	0.152	0.061	5.5	16.99	0.409	2.66	0.136	100.35	84.63	0.004
TB2-42A	56.365	24.5384	Boninitic Alley	12	53.34	19.12	0.124	0.133	6.1	18.88	0.237	0.91	0.198	99.04	84.66	0.0034
TB2-42A	56.365	24.5384	Boninitic Alley	13	52.8	21.21	0.183	0.118	5.48	17	0.727	2.71	0.182	100.41	84.68	0.0048
TB2-42A	56.365	24.5384	Boninitic Alley	14	53.1	19.59	0.14	0	5.93	18.53	0.703	1.27	0.175	99.44	84.78	0.0038
TB2-42A	56.365	24.5384	Boninitic Alley	15	53.15	19.3	0.158	0.07	5.86	18.33	0.863	1.2	0.191	99.12	84.79	0.0043
TB2-42A	56.365	24.5384	Boninitic Alley	16	53.13	19.73	0.141	0.019	5.94	18.65	0.363	1.07	0.176	99.22	84.84	0.0038
TB2-42A	56.365	24.5384	Boninitic Alley	17	53.07	20.21	0.148	0.139	5.64	17.71	0.559	2.87	0.156	100.5	84.84	0.0039
TB2-42A	56.365	24.5384	Boninitic Alley	18	52.85	20.48	0.172	0.103	5.72	17.97	0.628	1.31	0.166	99.4	84.85	0.0047
TB2-42A	56.365	24.5384	Boninitic Alley	19	52.82	20.5	0.136	0.185	5.63	17.79	0.705	1.34	0.175	99.28	84.92	0.0037
TB2-42A	56.365	24.5384	Boninitic Alley	20	53.36	21.1	0.136	0.079	5.61	17.83	0.184	1.1	0.155	99.55	85	0.0037
TB2-42A	56.365	24.5384	Boninitic Alley	21	52.84	19.49	0.165	0.03	5.73	18.4	0.936	1.24	0.169	99	85.13	0.0045
TB2-42A	56.365	24.5384	Boninitic Alley	22	52.6	21	0.146	0.104	5.44	17.56	0.74	1.3	0.162	99.05	85.19	0.004
TB2-42A	56.365	24.5384	Boninitic Alley	23	53.01	20.68	0.162	0.033	5.44	17.77	0.655	1.18	0.169	99.1	85.34	0.0044
TB2-42A	56.365	24.5384	Boninitic Alley	24	52.92	19.64	0.151	0.085	5.63	18.41	0.825	1.18	0.172	99.01	85.36	0.0041
TB2-42A	56.365	24.5384	Boninitic Alley	25	52.91	19.95	0.141	0.148	5.51	18.32	0.827	1.29	0.162	99.26	85.56	0.0038
TB2-42A	56.365	24.5384	Boninitic Alley	26	53.16	21.15	0.163	0.173	5.09	17.02	1.204	2.66	0.14	100.76	85.63	0.0043
TB2-42A	56.365	24.5384	Boninitic Alley	27	53.1	20.82	0.121	0.145	4.9	18.09	1.124	1.04	0.162	99.5	86.81	0.0033
TB2-42B	56.3727	24.5351	Boninitic Alley	1	53.18	20.39	0.126	0.066	5.01	18.39	0.708	1.36	0.16	99.39	86.74	0.0034
TB2-42B	56.3727	24.5351	Boninitic Alley	2	53.41	20.09	0.106	0.141	5.04	18.8	0.649	1.24	0.157	99.63	86.93	0.0029
TB2-42B	56.3727	24.5351	Boninitic Alley	3	53.6	20.1	0.081	0.112	4.88	18.92	0.783	1	0.147	99.62	87.36	0.0022
TB2-42B	56.3727	24.5351	Boninitic Alley	4	53.4	20.16	0.088	0.125	4.83	18.85	0.693	1.1	0.165	99.41	87.43	0.0024
TB2-42B	56.3727	24.5351	Boninitic Alley	5	53.18	20.44	0.088	0.028	4.75	18.9	0.848	1.03	0.151	99.42	87.64	0.0024
TB2-42B	56.3727	24.5351	Boninitic Alley	6	53.73	19.12	0.077	0.127	4.82	19.62	0.894	0.96	0.151	99.5	87.89	0.0021
TB2-42B	56.3727	24.5351	Boninitic Alley	7	54.4	19.29	0.065	0.095	4.9	20.07	0.589	0.73	0.168	100.31	87.95	0.0017
TB2-42B	56.3727	24.5351	Boninitic Alley	8	54.31	18.41	0.086	0.091	4.95	20.33	0.702	0.7	0.171	99.75	87.98	0.0023
TB2-42B	56.3727	24.5351	Boninitic Alley	9	54.47	20.11	0.071	0.056	4.67	19.38	0.494	0.64	0.146	100.04	88.09	0.0019
TB2-42B	56.3727	24.5351	Boninitic Alley	10	53.73	19.15	0.08	0.125	4.74	19.72	0.905	0.9	0.171	99.52	88.12	0.0022
TB2-42B	56.3727	24.5351	Boninitic Alley	11	53.8	19.54	0.074	0.06	4.65	19.41	0.913	0.93	0.164	99.54	88.15	0.002
TB2-42B	56.3727	24.5351	Boninitic Alley	12	54.24	19.27	0.068	0.072	4.77	20.01	0.702	0.73	0.171	100.03	88.2	0.0018
TB2-42B	56.3727	24.5351	Boninitic Alley	13	53.69	19.55	0.078	0.071	4.59	19.53	0.853	0.9	0.16	99.42	88.35	0.0021
TB2-42B	56.3727	24.5351	Boninitic Alley	14	54.32	19.76	0.068	0.109	4.55	19.42	0.666	0.78	0.164	99.84	88.38	0.0018
TB2-42B	56.3727	24.5351	Boninitic Alley	15	53.99	20.18	0.072	0.061	4.56	19.49	0.498	0.79	0.151	99.79	88.4	0.0019
TB2-42B	56.3727	24.5351	Boninitic Alley	16	54.31	19.95	0.075	0.083	4.55	19.51	0.708	0.8	0.148	100.13	88.43	0.002
TB2-42B	56.3727	24.5351	Boninitic Alley	17	54.19	19.58	0.073	0.083	4.54	19.5	0.806	0.9	0.15	99.82	88.45	0.002
TB2-42B	56.3727	24.5351	Boninitic Alley	18	54.2	19.59	0.087	0.088	4.5	19.37	0.894	0.97	0.168	99.87	88.47	0.0023
TB2-42B	56.3727	24.5351	Boninitic Alley	19	53.99	19.68	0.081	0.185	4.51	19.44	0.655	0.75	0.172	99.46	88.48	0.0022
TB2-42B	56.3727	24.5351	Boninitic Alley	20	53.48	20.75	0.065	0.076	4.41	19.02	0.866	0.85	0.152	99.67	88.49	0.0018
TB2-42B	56.3727	24.5351	Boninitic Alley	21	54.07	19.85	0.079	0.107	4.5	19.42	0.866	0.89	0.151	99.93	88.5	0.0021
TB2-42B	56.3727	24.5351	Boninitic Alley	22	54.42	20.17	0.069	0.069	4.47	19.41	0.641	0.69	0.146	100.09	88.56	0.0019
TB2-42B	56.3727	24.5351	Boninitic Alley	23	54.34	20.29	0.081	0.042	4.43	19.29	0.712	0.77	0.142	100.1	88.59	0.0022
TB2-42B	56.3727	24.5351	Boninitic Alley	24	54.19	20.27	0.05	0.045	4.44	19.43	0.74	0.76	0.134	100.06	88.64	0.0013
TB2-42B	56.3727	24.5351	Boninitic Alley	25	53.81	19.87	0.068	0.08	4.34	19.48	0.836	0.87	0.17	99.52	88.89	0.0018
TB2-42B	56.3727	24.5351	Boninitic Alley	26	54.42	20.39	0.054	0.046	4.31	19.45	0.651	0.68	0.151	100.15	88.94	0.0015
TB2-42B	56.3727	24.5351	Boninitic Alley	27	53.77	20.06	0.078	0.089	4.27	19.38	0.86	0.85	0.174	99.53	89	0.0021
TB2-42C	56.3727	24.5351	Boninitic Alley	1	54.06	19.78	0.059	0.121	4.82	18.98	0.649	0.72	0.166	99.36	87.53	0.0016
TB2-42C	56.3727	24.5351	Boninitic Alley	2	53.82	20.14	0.076	0.092	4.74	18.86	0.962	0.87	0.152	99.71	87.64	0.002
TB2-42C	56.3727	24.5351	Boninitic Alley	3	53.55	19.73	0.055	0.06	4.75	19.17	0.789	0.77	0.169	99.04	87.8	0.0015
TB2-42C	56.3727	24.5351	Boninitic Alley	4	54.12	19.08	0.092	0.142	4.77	19.54	0.842	0.77	0.156	99.51	87.95	0.0025
TB2-42C	56.3727	24.5351	Boninitic Alley	5	54.39	19.22	0.068	0.047	4.79	19.9	0.547	0.51	0.184	99.66	88.1	0.0018
TB2-42C	56.3727	24.5351	Boninitic Alley	6	53.81	20.45	0.079	0.118	4.5	18.83	0.858	0.81	0.171	99.63	88.18	0.0021
TB2-42C	56.3727	24.5351	Boninitic Alley	7	53.95	20.54	0.074	0.085	4.52	19.01	0.671	0.65	0.141	99.64	88.23	0.002
TB2-42C	56.3727	24.5351	Boninitic Alley	8	54.04	20.31	0.055	0.062	4.43	18.7	0.741	0.73	0.143	99.21	88.27	0.0015
TB2-42C	56.3727	24.5351	Boninitic Alley	9	54.45	19.36	0.077	0.08	4.6	19.55	0.584	0.56	0.163	99.42	88.34	0.0021
TB2-42C	56.3727	24.5351	Boninitic Alley	10	53.7	20.4	0.071	0.1	4.34	18.53	0.876	0.77	0.16	98.95	88.39	0.0019
TB2-42C	56.3727	24.5351	Boninitic Alley	11	53.81	19.68	0.065	0.096	4.5	19.22	0.766	0.71	0.179	99.03	88.39	0.0018
TB2-42C	56.3727	24.5351	Boninitic Alley	12	54.04	20.43	0.079	0.05	4.31	18.6	0.939	0.82	0.17	99.44	88.5	0.0021
TB2-42C	56.3727	24.5351	Boninitic Alley	13	54.26	20.06	0.058	0.116	4.39	19.09	0.682	0.63	0.157	99.44	88.57	0.0016
TB2-42C	56.3727	24.5351	Boninitic Alley	14	53.54	20.2	0.1	0.099	4.33	18.84	1.19	0.96	0.141	99.4	88.58	0.0027
TB2-42C	56.3727	24.5351	Boninitic Alley	15	54.25	20.03	0.037	0.065	4.43	19.39	0.569	0.62	0.14	99.53	88.64	0.001
TB2-42C	56.3727	24.5351	Boninitic Alley	16	54.65	20.05	0.055	0.098	4.28	19.48	0.669	0.57	0.139	99.99	89.03	0.0015
TB2-44A	56.4615	24.5576	Boninitic Alley	1	52.78	19.48	0.183	0.041	8.67	16.73	<0.001	0.91	0.218	99.01	77.47	0.0051
TB2-44A	56.4615	24.5576	Boninitic Alley	2	53.28	20.8	0.139	0.035	5.39	18	0.114	1.25	0.156	99.16	85.62	0.0038
TB2-44A	56.4615	24.5576	Boninitic Alley	3	53.43	19.89	0.136	0.113	5.16	18.67	0.258	1.25	0.14	99.05	86.58	0.0037
TB2-44A	56.4615	24.5576	Boninitic Alley	4	53.33	20.71	0.118	0.07	4.95	18.61	0.179	0.97	0.142	99.08	87.02	0.0032
TB2-44A	56.4615	24.5576	Boninitic Alley	5	53.47	21.17	0.105	0.043	4.77	18.29	0.442	1.08	0.16	99.53	87.24	0.0029
TB2-44A	56.4615	24.5576	Boninitic Alley	6	53.17	20.97	0.122	0.123	4.67	18.09	0.592	1.12	0.109	98.97	87.35	0.0033
TB2-44A	56.4615	24.5576	Boninitic Alley	7	53.55	21.39	0.102	0.101	4.51	18.04	0.476	1	0.135	99.3	87.7	0.0028
TB2-44A	56.4615	24.5576	Boninitic Alley	8	53.16	21.62	0.084	0.191	3.59	18.29	1.078	0.94	0.123	99.08	90.08	0.0023
TB2-44A	56.4615	24.5576	Boninitic Alley	9	54.07	20.68	0.077	0.139	3.65	19.12	0.666	0.63	0.112	99.14	90.33	0.0021
TB2-45B	56.496	24.5294	Boninitic Alley	1	52.96	18.31	0.204	0.142	7.08	18.95	0.182	1.27	0.182	99.28	82.67	0.0055
TB2-45B	56.496	24.5294	Boninitic Alley	2	52.91	19.66	0.168	0.105	6.83	18.42	0.187	0.97	0.198	99.45	82.78	0.0046
TB2-45B	56.496	24.5294	Boninitic Alley	3	53.56	20.07	0.154	0.145	6.41	18.11	0.12	0.79	0.2	99.56	83.43	0.0042
TB2-45B	56.496	24.5294	Boninitic Alley	4	53.67	20.41	0.164	0.106	6.52	18.49	0.129	0.81	0.157	100.46	83.48	0.0044
TB2-45B	56.496	24.5294	Boninitic Alley	5	53.36	20.06	0.167	0.09	6.37	18.22	0.143	0.83	0.181	99.42	83.6	0.0046
TB2-45B	56.496	24.5294	Boninitic Alley	6	53.69	20.27	0.152	0.095	6.22	18.09	0.147	0.73	0.172	99.57	83.83	0.0042
TB2-45B	56.496	24.5294	Boninitic Alley	7	53.51	20.36	0.137	0.088	6.22	18.14	0.155	0.74	0.165	99.52	83.87	0.0038
TB2-45B	56.496	24.5294	Boninitic Alley	8	53.65	19.85	0.141	0.086	6.44	18.84	0.124	0.81	0.192	100.13	83.91	0.0038
TB2-45B	56.496	24.5294	Boninitic Alley	9	53.15	20.5	0.144	0.087	6.18	18.09	0.166	0.8	0.167	99.28	83.92	0.0039
TB4-01A	56.5131	24.5251	Boninitic Alley	1	52.45	20.71	0.151	0.128	5.5	17.33	0.691	3.21	0.164	100.33	84.89	0.004
TB4-01A	56.5131	24.5251	Boninitic Alley	2	52.81	17.76	0.133	0.098	5.78	19.31	0.657	3.11	0.192	99.85	85.62	0.0035
TB4-01A	56.5131	24.5251	Boninitic Alley	3	53.04	19.26	0.148	0.114	5.33	18.66	0.342	3.49	0.183	100.57	86.19	0.0038
TB4-01A	56.5131	24.5251	Boninitic Alley	4	52.61	20.82	0.152	0.1	4.99	17.53	0.497	3.15	0.14	99.99	86.23	0.004
TB4-01A	56.5131	24.5251	Boninitic Alley	5	52.04	20.47	0.163	0.094	4.93	17.43	0.421	3.48	0.146	99.17	86.3	0.0043
TB4-01A	56.5131	24.5251	Boninitic Alley	6	53.32	21	0.13	0.173	4.88	17.88	0.528	2.5	0.151	100.56	86.72	0.0034
TB4-01A	56.5131	24.5251	Boninitic Alley	7	52.54	20.8	0.145	0.098	4.7	17.5	0.497	3.43	0.151	99.86	86.91	0.0038
TB4-01A	56.5131	24.5251	Boninitic Alley	8	53.47	20.17	0.076	0.117	4.83	18.3	0.41	1.77	0.142	99.29	87.1	0.0021
TB4-01A	56.5131	24.5251	Boninitic Alley	9	53.76	16.39	0.101	0.093	5.55	21.03	0.692	2.43	0.154	100.2	87.1	0.0026
TB4-01A	56.5131	24.5251	Boninitic Alley	10	52.86	21.94	0.113	0.116	4.41	17.46	0.344	2.19	0.143	99.58	87.59	0.003
TB4-01A	56.5131	24.5251	Boninitic Alley	11	52.76	21.81	0.086	0.112	4.16	17.43	0.781	2.4	0.129	99.67	88.19	0.0023
TB4-01A	56.5131	24.5251	Boninitic Alley	12	53.44	21.16	0.081	0.106	4.31	18.22	0.385	1.87	0.171	99.74	88.28	0.0022
TB4-01A	56.5131	24.5251	Boninitic Alley	13	52.77	21.84	0.059	0.099	4.03	17.61	0.676	2	0.136	99.22	88.62	0.0016
TB4-01A	56.5131	24.5251	Boninitic Alley	14	53.26	21.4	0.066	0.109	4.21	18.66	0.43	1.71	0.145	99.99	88.76	0.0017
TB4-01A	56.5131	24.5251	Boninitic Alley	15	53.67	21.32	0.087	0.099	4.15	18.44	0.374	1.7	0.153	99.99	88.79	0.0023
TB4-01A	56.5131	24.5251	Boninitic Alley	16	52.83	22.03	0.06	0.082	3.94	17.72	0.421	1.91	0.113	99.11	88.91	0.0016
TB4-01A	56.5131	24.5251	Boninitic Alley	17	53.44	20.57	0.097	0.143	4.09	18.48	1.126	2.44	0.128	100.51	88.95	0.0025
TB4-01A	56.5131	24.5251	Boninitic Alley	18	53.39	22.12	0.061	0.111	3.94	17.9	0.519	1.99	0.122	100.15	89.01	0.0016
TB4-01A	56.5131	24.5251	Boninitic Alley	19	52.57	22.02	0.074	0.116	3.81	17.55	0.798	2.15	0.128	99.22	89.14	0.002
TB4-01A	56.5131	24.5251	Boninitic Alley	20	52.83	21.92	0.066	0.1	3.74	17.4	0.91	2.01	0.141	99.12	89.24	0.0018
TB4-01A	56.5131	24.5251	Boninitic Alley	21	52.63	22.02	0.067	0.075	3.72	17.61	0.832	1.98	0.128	99.06	89.4	0.0018
TB4-01A	56.5131	24.5251	Boninitic Alley	22	53.75	21.4	0.045	0.13	3.82	18.67	0.694	1.75	0.13	100.39	89.7	0.0012
TB2-40D	56.3809	24.6885	Depleted Lasail	1	51.51	19.76	0.308	0.229	5.85	16.71	0.321	5.34	0.169	100.2	83.58	0.0079
TB2-40D	56.3809	24.6885	Depleted Lasail	2	50.62	21.24	0.474	0.19	5.55	15.91	0.37	5.63	0.146	100.13	83.63	0.0122
TB2-40D	56.3809	24.6885	Depleted Lasail	3	51.43	21.13	0.276	0.101	5.61	16.16	0.347	4.62	0.14	99.81	83.7	0.0072
TB2-40D	56.3809	24.6885	Depleted Lasail	4	51.53	20.82	0.343	0.165	5.57	16.25	0.304	4.94	0.137	100.06	83.87	0.0089
TB2-40D	56.3809	24.6885	Depleted Lasail	5	51.17	20.87	0.261	0.137	5.61	16.38	0.361	4.73	0.157	99.68	83.88	0.0068
TB2-40D	56.3809	24.6885	Depleted Lasail	6	51.59	21.36	0.266	0.082	5.49	16.08	0.368	4.73	0.13	100.1	83.92	0.0069
TB2-40D	56.3809	24.6885	Depleted Lasail	7	51.18	21.62	0.364	0.115	5.41	15.95	0.166	5.42	0.149	100.37	84.01	0.0094
TB2-40D	56.3809	24.6885	Depleted Lasail	8	51.91	21.75	0.365	0.156	5.41	16.03	0.48	4.32	0.15	100.57	84.08	0.0095
TB2-40D	56.3809	24.6885	Depleted Lasail	9	51.67	20.92	0.356	0.102	5.44	16.48	0.42	4.7	0.151	100.24	84.37	0.0093
TB2-40D	56.3809	24.6885	Depleted Lasail	10	51.3	21.46	0.322	0.172	5.31	16.13	0.594	4.37	0.186	99.84	84.41	0.0084
TB2-40D	56.3809	24.6885	Depleted Lasail	11	52.04	21.03	0.254	0.116	5.37	16.55	0.489	4.14	0.143	100.13	84.6	0.0066
TB2-40D	56.3809	24.6885	Depleted Lasail	12	51.96	20.44	0.227	0.167	5.49	16.96	0.369	4.23	0.144	99.99	84.63	0.0059
TB2-40D	56.3809	24.6885	Depleted Lasail	13	51.86	21.05	0.29	0.113	5.24	16.23	0.477	4.06	0.13	99.45	84.66	0.0077
TB2-40D	56.3809	24.6885	Depleted Lasail	14	51.65	21.05	0.287	0.14	5.22	16.23	0.65	4.15	0.152	99.53	84.71	0.0075
TB2-40D	56.3809	24.6885	Depleted Lasail	15	51.93	21.14	0.258	0.055	5.31	16.61	0.486	3.93	0.174	99.89	84.79	0.0068
TB2-40D	56.3809	24.6885	Depleted Lasail	16	51.4	21.32	0.269	0.122	5.16	16.19	0.311	4.84	0.153	99.77	84.83	0.007
TB2-40D	56.3809	24.6885	Depleted Lasail	17	51.91	21.18	0.279	0.096	5.31	16.68	0.39	3.98	0.134	99.96	84.85	0.0073
TB2-40D	56.3809	24.6885	Depleted Lasail	18	52.03	21.08	0.3	0.099	5.21	16.54	0.384	3.94	0.165	99.75	84.98	0.0079
TB2-40D	56.3809	24.6885	Depleted Lasail	19	52.18	21.34	0.265	0.088	5.1	16.34	0.426	3.96	0.131	99.83	85.1	0.007
TB2-40D	56.3809	24.6885	Depleted Lasail	20	52.05	21.09	0.271	0.146	5.2	16.68	0.39	3.91	0.154	99.89	85.11	0.0071
TB2-40D	56.3809	24.6885	Depleted Lasail	21	54.08	17.26	0.155	0.06	6.32	20.58	0.314	0.97	0.208	99.95	85.3	0.0042
TB2-40D	56.3809	24.6885	Depleted Lasail	22	54.16	18.31	0.131	0.157	5.94	19.71	0.314	0.8	0.189	99.71	85.54	0.0035
TB2-40D	56.3809	24.6885	Depleted Lasail	23	51.83	21.59	0.235	0.098	4.95	16.5	0.833	3.63	0.136	99.8	85.59	0.0062
TB2-40D	56.3809	24.6885	Depleted Lasail	24	54.59	18.07	0.115	0.145	5.89	19.66	0.307	0.82	0.178	99.78	85.61	0.0031
TB2-40D	56.3809	24.6885	Depleted Lasail	25	52.25	21.6	0.226	0.102	4.71	16.52	0.605	3.27	0.115	99.4	86.21	0.006
TB2-40D	56.3809	24.6885	Depleted Lasail	26	52.25	21.33	0.23	0.143	4.73	16.65	0.708	3.4	0.134	99.58	86.25	0.0061
TB2-40D	56.3809	24.6885	Depleted Lasail	27	52.32	22.09	0.207	0.15	4.51	16.43	1.068	3.07	0.123	99.97	86.66	0.0055
LD10-1251	56.4538	24.5644	Felsic Alley	1	50.25	17.89	0.86	0.33	15.57	11.97	0.018	3.37	0.367	100.63	57.81	0.0234
LD10-1251	56.4538	24.5644	Felsic Alley	2	50.11	17.94	0.86	0.253	15.58	12.16	0.006	3.54	0.334	100.78	58.18	0.0234
LD10-1251	56.4538	24.5644	Felsic Alley	3	50.25	18.15	0.844	0.194	15.18	11.92	0.031	3.27	0.34	100.18	58.33	0.0231
LD10-1251	56.4538	24.5644	Felsic Alley	4	50.42	18.45	0.78	0.273	15.1	11.99	0.014	3.31	0.348	100.69	58.6	0.0212
LD10-1251	56.4538	24.5644	Felsic Alley	5	50.08	18.17	0.939	0.197	15.55	12.48	<0.001	3.2	0.378	100.99	58.86	0.0256
LD10-1251	56.4538	24.5644	Felsic Alley	6	50.57	17.09	0.796	0.228	15.65	12.68	<0.001	2.86	0.382	100.26	59.09	0.0219
LD10-1251	56.4538	24.5644	Felsic Alley	7	50.83	17.85	0.737	0.228	15.3	12.4	0.005	2.74	0.401	100.49	59.09	0.0203
LD10-1251	56.4538	24.5644	Felsic Alley	8	50.97	17.81	0.711	0.226	14.44	13.27	0.022	2.5	0.363	100.31	62.09	0.0195
LD10-1251	56.4538	24.5644	Felsic Alley	9	52.08	18.16	0.461	0.23	13.64	13.89	0.013	1.81	0.343	100.63	64.48	0.0127
LD10-1251	56.4538	24.5644	Felsic Alley	10	52.75	18	0.396	0.09	13.53	14.17	0.015	1.36	0.332	100.64	65.12	0.011
LD10-1251	56.4538	24.5644	Felsic Alley	11	52.03	18.36	0.513	0.237	13.22	14.14	0.011	1.86	0.335	100.71	65.59	0.0141
LD10-1251	56.4538	24.5644	Felsic Alley	12	52.6	19	0.433	0.228	12.7	13.97	0.002	1.69	0.307	100.93	66.22	0.0119
LD10-1251	56.4538	24.5644	Felsic Alley	13	52.05	18.92	0.474	0.246	12.47	13.89	0.014	1.83	0.327	100.22	66.5	0.013
LD10-1251	56.4538	24.5644	Felsic Alley	14	52.83	18.94	0.421	0.155	12.57	14.12	<0.001	1.62	0.283	100.94	66.69	0.0116
LD10-1251	56.4538	24.5644	Felsic Alley	15	52.52	19.03	0.479	0.303	12.46	14	0.011	1.79	0.303	100.9	66.7	0.0131
LD10-1251	56.4538	24.5644	Felsic Alley	16	52.24	18.62	0.493	0.177	11.85	14.64	0.049	2.18	0.307	100.56	68.77	0.0134
LD10-1251	56.4538	24.5644	Felsic Alley	17	52.66	19.13	0.458	0.171	11.54	14.46	0.046	2.07	0.278	100.81	69.07	0.0125
LD10-1251	56.4538	24.5644	Felsic Alley	18	52.31	19.16	0.436	0.186	11.43	14.44	0.073	2.05	0.284	100.37	69.25	0.0119
AB16-4472	56.3748	24.5019	Geotimes	1	50.77	19.04	1.036	0.326	11.65	14.27	0.024	3.19	0.279	100.59	68.59	0.0278
AB16-4472	56.3748	24.5019	Geotimes	2	50.95	20.28	0.948	0.265	10.94	13.78	0.012	1.5	0.352	99.03	69.19	0.0264
AB16-4472	56.3748	24.5019	Geotimes	3	50.96	19.54	0.988	0.324	11.27	14.28	0.03	1.54	0.263	99.2	69.31	0.0274
AB16-4472	56.3748	24.5019	Geotimes	4	51.49	19.43	0.93	0.259	11.08	14.61	0.011	3	0.28	101.09	70.15	0.0249
AB16-4472	56.3748	24.5019	Geotimes	5	51.37	19.68	0.924	0.324	10.94	14.59	0.034	1.44	0.264	99.57	70.39	0.0255
AB16-4472	56.3748	24.5019	Geotimes	6	51.5	19.48	0.883	0.214	10.93	14.7	0.035	2.98	0.283	101.01	70.56	0.0237
AB16-4472	56.3748	24.5019	Geotimes	7	51.46	19.62	0.918	0.314	10.85	14.68	0.034	1.47	0.256	99.6	70.69	0.0253
AB16-4472	56.3748	24.5019	Geotimes	8	50.95	18.72	0.953	0.289	11.07	15.37	0.01	1.73	0.296	99.39	71.22	0.0262
AB16-4472	56.3748	24.5019	Geotimes	9	53.04	16.29	0.525	0.231	11.97	17.24	0.002	0.83	0.385	100.51	71.97	0.0144
AB16-4472	56.3748	24.5019	Geotimes	10	50.33	18.73	0.922	0.345	10.57	15.41	0.014	3.39	0.268	99.98	72.21	0.0247
AB16-4472	56.3748	24.5019	Geotimes	11	52.19	19.97	0.798	0.363	10.16	14.99	0.042	2.41	0.251	101.17	72.45	0.0213
AB16-4472	56.3748	24.5019	Geotimes	12	50.93	20.63	0.991	0.318	9.81	14.52	0.032	3.78	0.233	101.24	72.51	0.0261
AB16-4472	56.3748	24.5019	Geotimes	13	53.52	18.78	0.573	0.265	10.6	15.78	0.015	1.63	0.298	101.46	72.63	0.0154
AB16-4472	56.3748	24.5019	Geotimes	14	51.22	20.33	0.861	0.395	9.43	15.18	0.063	1.67	0.218	99.37	74.16	0.0236
AB16-4472	56.3748	24.5019	Geotimes	15	51.47	20.07	0.826	0.246	9.35	15.29	0.055	3.31	0.211	100.83	74.46	0.0219
AB16-4472	56.3748	24.5019	Geotimes	16	51.7	20.2	0.8	0.312	8.9	15.18	0.068	3.15	0.208	100.52	75.25	0.0213
AB16-4472	56.3748	24.5019	Geotimes	17	51.85	20.72	0.736	0.24	8.8	15.22	0.04	1.52	0.214	99.34	75.51	0.0202
AB16-4472	56.3748	24.5019	Geotimes	18	52.3	20.57	0.703	0.307	8.57	15.42	0.065	2.75	0.204	100.89	76.23	0.0187
AB16-4483	56.3725	24.501	Geotimes	1	50.1	18.3	1.345	0.338	11.91	14.75	0.017	1.99	0.321	99.07	68.82	0.0371
AB16-4483	56.3725	24.501	Geotimes	2	51.42	18.21	0.955	0.327	11.88	14.83	0.004	1.42	0.387	99.43	68.99	0.0264
AB16-4483	56.3725	24.501	Geotimes	3	51.61	18.37	0.935	0.302	11.77	14.95	0.009	1.43	0.392	99.77	69.36	0.0258
AB16-4483	56.3725	24.501	Geotimes	4	51.45	18.66	1.172	0.275	11.49	14.92	0.016	1.6	0.301	99.88	69.83	0.0322
AB16-4483	56.3725	24.501	Geotimes	5	51.44	18.83	1.003	0.31	11.25	14.67	<0.001	1.48	0.353	99.34	69.92	0.0278
AB16-4483	56.3725	24.501	Geotimes	6	51.33	19.5	1.005	0.325	10.79	14.44	<0.001	1.53	0.329	99.25	70.46	0.0278
AB16-4483	56.3725	24.501	Geotimes	7	51.42	19.79	0.994	0.331	10.54	14.47	<0.001	1.5	0.292	99.34	70.99	0.0275
AB16-4483	56.3725	24.501	Geotimes	8	51.6	19.5	0.914	0.393	10.76	14.79	0.004	1.43	0.328	99.72	71.01	0.0251
AB16-4483	56.3725	24.501	Geotimes	9	51.12	19.41	0.978	0.41	10.67	14.74	0.004	1.57	0.322	99.22	71.12	0.027
AB16-4483	56.3725	24.501	Geotimes	10	51.48	19.48	0.983	0.252	10.63	14.73	0.001	1.46	0.336	99.35	71.18	0.0272
AB16-4483	56.3725	24.501	Geotimes	11	51.67	18.75	0.916	0.31	10.89	15.43	0.028	1.49	0.322	99.81	71.64	0.0251
AB16-4483	56.3725	24.501	Geotimes	12	51.76	20.02	0.948	0.353	10.2	14.46	0.013	1.37	0.302	99.43	71.65	0.0262
AB16-4483	56.3725	24.501	Geotimes	13	51.52	19.92	0.867	0.343	10.17	14.83	0.012	1.59	0.278	99.53	72.22	0.0238
AB16-4483	56.3725	24.501	Geotimes	14	51.43	19.91	0.911	0.298	10.1	14.73	0.016	1.54	0.277	99.21	72.22	0.0252
AB16-4483	56.3725	24.501	Geotimes	15	51.73	19.27	0.927	0.356	10.35	15.12	0.015	1.53	0.289	99.59	72.25	0.0254
AB16-4483	56.3725	24.501	Geotimes	16	51.43	20.08	0.862	0.32	9.93	14.65	0.013	1.61	0.269	99.16	72.45	0.0238
AB16-4483	56.3725	24.501	Geotimes	17	52.71	18.22	0.591	0.262	10.75	15.98	0.012	1	0.334	99.86	72.6	0.0163
AB16-4483	56.3725	24.501	Geotimes	18	51.8	19.85	0.922	0.254	9.94	14.82	0.006	1.51	0.285	99.39	72.66	0.0255
AB16-4483	56.3725	24.501	Geotimes	19	51.67	19.99	0.822	0.375	9.92	14.92	0.006	1.44	0.3	99.44	72.83	0.0226
AB16-4483	56.3725	24.501	Geotimes	20	51.57	19.78	0.888	0.345	9.96	15.02	0.004	1.46	0.274	99.3	72.89	0.0245
AB16-4483	56.3725	24.501	Geotimes	21	51.58	19.66	0.774	0.319	9.9	15.11	0.022	1.41	0.284	99.06	73.12	0.0214
AB16-4483	56.3725	24.501	Geotimes	22	51.96	20.21	0.901	0.325	9.77	14.92	0.009	1.49	0.255	99.84	73.13	0.0247
AB16-4483	56.3725	24.501	Geotimes	23	51.9	20.54	0.873	0.347	9.63	14.94	0.016	1.45	0.25	99.95	73.44	0.0239
AB16-4483	56.3725	24.501	Geotimes	24	53.25	18.85	0.539	0.197	10.25	16.05	<0.001	0.84	0.347	100.32	73.62	0.0148
AB16-4483	56.3725	24.501	Geotimes	25	51.78	20.41	0.888	0.221	9.5	14.94	0.004	1.47	0.242	99.46	73.71	0.0245
AB16-4483	56.3725	24.501	Geotimes	26	52.38	18.56	0.538	0.241	10.19	16.12	0.003	0.96	0.339	99.33	73.82	0.0149
AB16-4483	56.3725	24.501	Geotimes	27	52.96	19.45	0.527	0.201	9.93	16.08	0.005	0.86	0.327	100.34	74.27	0.0145
AB16-4483	56.3725	24.501	Geotimes	28	53.05	20.32	0.657	0.343	9.42	15.33	0.024	1.08	0.264	100.49	74.36	0.0179
AB16-4483	56.3725	24.501	Geotimes	29	53.09	20.42	0.683	0.252	9.28	15.55	0.015	1.14	0.267	100.7	74.92	0.0186
AB16-4511	56.3317	24.8376	Geotimes	1	52.44	20.15	0.704	0.321	8.17	15.81	0.059	3.19	0.206	101.05	77.52	0.0186
AB16-4511	56.3317	24.8376	Geotimes	2	52.94	19.3	0.528	0.206	8.11	17.04	0.055	2.61	0.243	101.03	78.93	0.014
AB16-4511	56.3317	24.8376	Geotimes	3	53.88	18.36	0.38	0.206	8.26	17.62	0.045	1.86	0.245	100.86	79.18	0.0101
AB16-4511	56.3317	24.8376	Geotimes	4	53.03	20.57	0.557	0.208	7.38	16.5	0.061	2.73	0.183	101.22	79.94	0.0147
AB16-4511	56.3317	24.8376	Geotimes	5	53.32	19.77	0.434	0.204	7.72	17.39	0.028	1.94	0.222	101.03	80.06	0.0116
AB16-4511	56.3317	24.8376	Geotimes	6	53.79	19.49	0.394	0.251	7.35	16.93	0.068	1.96	0.222	100.46	80.41	0.0106
AB16-4511	56.3317	24.8376	Geotimes	7	53.32	20.74	0.508	0.147	6.56	16.41	0.135	2.69	0.189	100.7	81.68	0.0135
AB16-4511	56.3317	24.8376	Geotimes	8	53.67	20.93	0.43	0.176	6.43	16.95	0.203	2.49	0.182	101.46	82.45	0.0113
AB16-4511	56.3317	24.8376	Geotimes	9	53.2	20.52	0.483	0.272	6.2	16.57	0.225	2.98	0.179	100.63	82.65	0.0127
AB16-4511	56.3317	24.8376	Geotimes	10	52.7	20.93	0.485	0.125	6	16.59	0.204	2.98	0.159	100.17	83.13	0.0129
AB16-4511	56.3317	24.8376	Geotimes	11	52.91	21.01	0.524	0.246	5.84	16.44	0.363	3.4	0.142	100.88	83.38	0.0137
AB16-4511	56.3317	24.8376	Geotimes	12	53.76	20.98	0.317	0.256	5.84	17.65	0.183	1.95	0.182	101.12	84.34	0.0084
AB16-4521	56.3564	24.8357	Geotimes	1	46.34	22.19	2.43	0.48	11.13	9.98	0.158	7.01	0.188	99.91	61.51	0.0636
AB16-4521	56.3564	24.8357	Geotimes	2	46.5	22.3	2.45	0.563	10.5	10.37	0.166	6.54	0.158	99.55	63.77	0.0644
AB16-4521	56.3564	24.8357	Geotimes	3	46.54	21.99	2.44	0.526	10.82	11.18	0.259	6.5	0.195	100.45	64.81	0.0635
AB16-4521	56.3564	24.8357	Geotimes	4	47.59	21.93	1.83	0.616	10.39	10.74	0.275	5.69	0.187	99.25	64.82	0.0485
AB16-4521	56.3564	24.8357	Geotimes	5	46.8	21.87	2.16	0.516	10.14	11.23	0.114	6.74	0.185	99.76	66.38	0.0563
AB16-4521	56.3564	24.8357	Geotimes	6	46.28	22.47	2.23	0.329	9.23	11.08	0.259	7.53	0.185	99.59	68.15	0.0579
AB16-4521	56.3564	24.8357	Geotimes	7	46.04	22.03	3.5	0.705	8.99	11.31	0.496	7.44	0.134	100.65	69.16	0.0893
AB16-4521	56.3564	24.8357	Geotimes	8	48.61	22.42	2.16	0.538	9.46	12.58	0.03	4.93	0.156	100.88	70.33	0.0566
AB16-4521	56.3564	24.8357	Geotimes	9	47.06	22.83	2.22	0.539	8.49	11.3	0.162	6.69	0.126	99.42	70.35	0.0579
AB16-4521	56.3564	24.8357	Geotimes	10	47.9	22.68	2.33	0.553	8.6	12.52	0.175	5.64	0.121	100.52	72.18	0.0606
AB16-4521	56.3564	24.8357	Geotimes	11	48.07	22.49	2.27	0.492	8.42	12.58	0.19	5.57	0.128	100.21	72.7	0.0593
AB16-4521	56.3564	24.8357	Geotimes	12	48.5	22.28	2.17	0.529	8.46	12.88	0.107	5.69	0.114	100.73	73.07	0.0563
AB16-4521	56.3564	24.8357	Geotimes	13	48.58	22.46	2.16	0.463	8.11	13.07	0.247	5.49	0.116	100.7	74.18	0.0561
AB16-4521	56.3564	24.8357	Geotimes	14	48.37	21.75	2.31	0.497	8.1	13.11	0.255	6.28	0.124	100.8	74.26	0.0594
AB16-4521	56.3564	24.8357	Geotimes	15	48.01	22.7	2.6	0.413	7.86	12.76	0.578	5.4	0.117	100.44	74.32	0.0679
AB16-4521	56.3564	24.8357	Geotimes	16	48.42	23.04	2.01	0.433	8.1	13.19	0.187	4.84	0.124	100.34	74.38	0.0528
AB16-4521	56.3564	24.8357	Geotimes	17	49.48	21.96	1.6	0.448	8.18	13.49	0.193	5.39	0.128	100.87	74.62	0.0415
AB16-4521	56.3564	24.8357	Geotimes	18	49.62	22.93	1.86	0.485	7.47	13.59	0.28	4.36	0.125	100.72	76.43	0.0487
AB16-4571	56.3248	24.7864	Geotimes	1	52.16	18.93	0.679	0.273	11.92	14.89	0.012	1.6	0.355	100.82	69.01	0.0185
AB16-4571	56.3248	24.7864	Geotimes	2	51.94	19.35	0.699	0.278	11.33	14.96	<0.001	1.84	0.283	100.68	70.18	0.019
AB16-4571	56.3248	24.7864	Geotimes	3	51.21	19.28	0.893	0.275	11.09	14.78	0.019	2.9	0.294	100.74	70.38	0.024
AB16-4571	56.3248	24.7864	Geotimes	4	51.61	19.43	0.8	0.319	10.75	14.86	0.013	2.56	0.269	100.61	71.13	0.0215
AB16-4571	56.3248	24.7864	Geotimes	5	51.18	20.36	0.828	0.261	10.36	14.67	0.023	2.64	0.28	100.6	71.62	0.0223
AB16-4571	56.3248	24.7864	Geotimes	6	51.69	19.66	0.739	0.304	10.48	15.13	0.04	2.52	0.271	100.83	72.01	0.0198
AB16-4571	56.3248	24.7864	Geotimes	7	52.25	20.02	0.614	0.328	10.26	15.37	0.016	1.83	0.298	100.99	72.75	0.0165
AB16-4571	56.3248	24.7864	Geotimes	8	51.48	20.4	0.768	0.269	9.63	15.05	0.021	2.68	0.239	100.54	73.58	0.0206
AB16-4571	56.3248	24.7864	Geotimes	9	52.07	19.61	0.587	0.29	9.71	15.75	0.011	1.91	0.259	100.2	74.3	0.0159
AB16-4571	56.3248	24.7864	Geotimes	10	52.29	20.11	0.601	0.299	9.6	15.68	<0.001	1.72	0.249	100.55	74.43	0.0163
AB16-4571	56.3248	24.7864	Geotimes	11	52.93	19.81	0.588	0.215	9.59	15.72	0.023	1.77	0.269	100.92	74.5	0.0159
AB16-4571	56.3248	24.7864	Geotimes	12	51.31	20.87	0.72	0.295	8.72	15.34	0.046	2.67	0.212	100.18	75.82	0.0193
AB16-4571	56.3248	24.7864	Geotimes	13	52.48	20.58	0.576	0.315	8.25	15.84	0.058	2.21	0.211	100.52	77.39	0.0154
AB16-4571	56.3248	24.7864	Geotimes	14	52.07	20.76	0.638	0.237	7.95	15.84	0.08	2.55	0.189	100.31	78.03	0.0171
AB16-4571	56.3248	24.7864	Geotimes	15	52.97	20.5	0.534	0.271	7.93	15.83	0.137	2.11	0.218	100.5	78.06	0.0143
AB16-4571	56.3248	24.7864	Geotimes	16	52.92	20.93	0.526	0.225	7.83	16.05	0.053	1.91	0.228	100.67	78.51	0.0141
AB16-4571	56.3248	24.7864	Geotimes	17	52.56	21.45	0.545	0.251	7.17	15.96	0.192	2.38	0.183	100.69	79.87	0.0145
AB16-4571	56.3248	24.7864	Geotimes	18	52.93	21.02	0.503	0.319	7.27	16.21	0.112	2.05	0.192	100.61	79.9	0.0134
AB16-4571	56.3248	24.7864	Geotimes	19	52.96	21.29	0.495	0.288	7.05	16.21	0.161	2.1	0.188	100.74	80.39	0.0132
AB16-4571	56.3248	24.7864	Geotimes	20	52.65	21.04	0.486	0.212	7.07	16.31	0.173	2.11	0.2	100.25	80.44	0.013
AB16-4592	56.3121	24.8203	Geotimes	1	50.81	18.85	1.174	0.296	9.41	15.53	0.038	4.6	0.223	100.93	74.63	0.0307
AB16-4592	56.3121	24.8203	Geotimes	2	50.31	19.72	1.08	0.235	9.02	14.9	0.033	5.29	0.219	100.81	74.65	0.0281
AB16-4592	56.3121	24.8203	Geotimes	3	50.26	19.77	1.268	0.235	8.95	15.17	0.037	5.45	0.216	101.36	75.13	0.0327
AB16-4592	56.3121	24.8203	Geotimes	4	51.21	19.01	0.933	0.267	8.82	16.39	0.05	3.75	0.233	100.66	76.81	0.0246
AB16-4592	56.3121	24.8203	Geotimes	5	51.05	20.75	1.134	0.237	7.97	15.04	0.048	4.68	0.189	101.1	77.08	0.0296
AB16-4592	56.3121	24.8203	Geotimes	6	51.62	20.52	1.001	0.343	7.98	15.44	0.119	4.04	0.199	101.26	77.52	0.0261
AB16-4592	56.3121	24.8203	Geotimes	7	51.15	19.24	0.993	0.217	8.38	16.25	0.096	4.26	0.225	100.81	77.56	0.026
AB16-4592	56.3121	24.8203	Geotimes	8	51.52	20.96	1.095	0.231	7.95	15.43	0.116	3.92	0.186	101.41	77.58	0.0286
AB16-4592	56.3121	24.8203	Geotimes	9	51.96	20.58	0.869	0.271	8.02	15.79	0.104	3.68	0.181	101.46	77.82	0.0227
AB16-4592	56.3121	24.8203	Geotimes	10	51.97	20.64	0.917	0.26	8.01	15.78	0.095	3.58	0.203	101.46	77.83	0.024
AB16-4592	56.3121	24.8203	Geotimes	11	51.62	18.96	0.824	0.24	8.16	16.71	0.177	3.98	0.2	100.87	78.5	0.0215
AB16-4592	56.3121	24.8203	Geotimes	12	52.19	18.75	0.726	0.189	8.28	16.96	0.16	3.51	0.193	100.96	78.5	0.0191
AB16-4592	56.3121	24.8203	Geotimes	13	51.94	20.18	0.849	0.267	7.69	15.9	0.165	3.85	0.213	101.05	78.66	0.0222
AB16-4592	56.3121	24.8203	Geotimes	14	52.29	19.2	0.768	0.253	8.1	16.8	0.088	3.5	0.212	101.21	78.71	0.0201
AB16-4592	56.3121	24.8203	Geotimes	15	51.94	19.83	0.87	0.285	7.56	16.06	0.216	4.21	0.19	101.16	79.11	0.0226
AB16-4592	56.3121	24.8203	Geotimes	16	52.42	21.02	0.758	0.219	7.24	15.75	0.159	3.65	0.176	101.39	79.5	0.0198
AB16-4592	56.3121	24.8203	Geotimes	17	52.4	19.85	0.67	0.259	7.32	16.52	0.243	3.58	0.176	101.02	80.09	0.0175
AB16-4592	56.3121	24.8203	Geotimes	18	54.06	18.62	0.42	0.243	7.73	18.03	0.112	1.77	0.219	101.2	80.61	0.0112
AB16-4592	56.3121	24.8203	Geotimes	19	53.11	19.93	0.598	0.276	7.02	16.93	0.291	3.17	0.169	101.49	81.13	0.0156
AB16-4592	56.3121	24.8203	Geotimes	20	53.08	20.85	0.557	0.248	6.73	16.47	0.235	2.82	0.167	101.16	81.35	0.0147
AB16-4592	56.3121	24.8203	Geotimes	21	53.1	20.68	0.549	0.313	6.74	16.77	0.217	2.74	0.196	101.31	81.6	0.0144
AB16-4592	56.3121	24.8203	Geotimes	22	52.94	20.75	0.5	0.272	6.74	17.03	0.226	2.69	0.168	101.32	81.83	0.0131
AB16-4592	56.3121	24.8203	Geotimes	23	54.23	19.34	0.374	0.196	7.04	17.95	0.158	1.84	0.221	101.35	81.96	0.0099
AB16-4592	56.3121	24.8203	Geotimes	24	53.17	21.02	0.49	0.239	6.39	16.51	0.229	2.51	0.174	100.73	82.16	0.013
AB16-4592	56.3121	24.8203	Geotimes	25	53.07	20.96	0.501	0.214	6.54	16.9	0.221	2.6	0.156	101.16	82.16	0.0132
AB16-4592	56.3121	24.8203	Geotimes	26	53.09	20.27	0.482	0.251	6.64	17.22	0.284	2.85	0.179	101.27	82.21	0.0126
AB16-4592	56.3121	24.8203	Geotimes	27	51.84	20.6	0.573	0.227	6.47	16.78	0.435	3.54	0.157	100.62	82.22	0.015
AB16-4592	56.3121	24.8203	Geotimes	28	53.94	20.07	0.377	0.241	6.76	17.7	0.163	1.79	0.2	101.24	82.35	0.01
LD10-1231	56.3741	24.4705	Geotimes	1	50.02	20.02	1.043	0.361	10.21	14.48	0.019	3.77	0.234	100.16	71.65	0.0278
LD10-1231	56.3741	24.4705	Geotimes	2	50.8	19.52	0.845	0.333	10.44	14.9	0.018	3.11	0.269	100.24	71.78	0.0227
LD10-1231	56.3741	24.4705	Geotimes	3	49.24	20.65	1.291	0.311	9.5	13.9	0.03	4.29	0.21	99.42	72.28	0.0345
LD10-1231	56.3741	24.4705	Geotimes	4	51.58	18.95	0.767	0.217	9.92	15.58	0.039	1.99	0.278	99.32	73.68	0.021
LD10-1231	56.3741	24.4705	Geotimes	5	51.29	20.7	0.773	0.413	8.94	14.47	0.033	2.76	0.235	99.61	74.26	0.0208
LD10-1231	56.3741	24.4705	Geotimes	6	51.79	19.28	0.726	0.294	9.39	15.93	0.012	1.83	0.28	99.53	75.15	0.0198
LD10-1231	56.3741	24.4705	Geotimes	7	51.14	20.52	0.782	0.311	8.86	15.21	0.066	2.67	0.241	99.8	75.37	0.0211
LD10-1231	56.3741	24.4705	Geotimes	8	51.42	20.66	0.778	0.344	8.8	15.17	0.04	2.64	0.238	100.09	75.45	0.0209
LD10-1231	56.3741	24.4705	Geotimes	9	51.3	20.64	0.756	0.395	8.75	15.26	0.055	2.62	0.212	99.99	75.66	0.0203
LD10-1231	56.3741	24.4705	Geotimes	10	51.42	20.59	0.744	0.387	8.65	15.33	0.035	2.47	0.236	99.86	75.96	0.02
LD10-1231	56.3741	24.4705	Geotimes	11	51.4	20.66	0.712	0.405	8.53	15.28	0.078	2.41	0.223	99.7	76.15	0.0192
LD10-1231	56.3741	24.4705	Geotimes	12	51.65	19.48	0.709	0.273	8.75	16.23	0.069	2.29	0.259	99.71	76.78	0.0192
LD10-1231	56.3741	24.4705	Geotimes	13	50.66	21.39	0.833	0.32	6.5	15.39	0.378	4.06	0.173	99.7	80.84	0.0219
LD10-1231	56.3741	24.4705	Geotimes	14	51.72	21.49	0.548	0.348	6.46	16.17	0.337	3.15	0.167	100.39	81.69	0.0144
LD10-1231	56.3741	24.4705	Geotimes	15	52.22	21.41	0.569	0.258	6.44	16.18	0.171	2.57	0.18	100	81.75	0.0152
LD10-1231	56.3741	24.4705	Geotimes	16	51.74	21.45	0.562	0.337	6.32	15.93	0.158	2.77	0.179	99.45	81.79	0.015
LD10-1231	56.3741	24.4705	Geotimes	17	52.42	21.45	0.54	0.324	6.24	16.23	0.238	2.46	0.17	100.07	82.26	0.0144
LD10-1231	56.3741	24.4705	Geotimes	18	52.3	21.55	0.549	0.289	6.19	16.18	0.255	2.51	0.174	100	82.33	0.0147
LD10-1231	56.3741	24.4705	Geotimes	19	50.79	20.95	0.632	0.347	5.8	15.61	1.087	4.17	0.185	99.57	82.75	0.0165
LD10-1231	56.3741	24.4705	Geotimes	20	50.85	21.12	0.607	0.315	5.74	15.8	0.924	3.81	0.184	99.35	83.07	0.016
LD10-1231	56.3741	24.4705	Geotimes	21	51.86	21.69	0.562	0.261	5.83	16.07	0.352	2.86	0.156	99.64	83.09	0.015
LD10-1231	56.3741	24.4705	Geotimes	22	50.29	21.93	0.62	0.282	5.39	15.2	1.251	4.4	0.151	99.51	83.41	0.0162
LD10-1231	56.3741	24.4705	Geotimes	23	52.11	21.7	0.489	0.33	5.8	16.55	0.251	2.6	0.16	99.99	83.57	0.013
LD10-1231	56.3741	24.4705	Geotimes	24	51.9	21.8	0.489	0.275	5.71	16.3	0.311	2.79	0.151	99.73	83.57	0.013
LD10-1231	56.3741	24.4705	Geotimes	25	51.06	21.64	0.619	0.325	5.55	16.11	0.693	3.89	0.153	100.04	83.8	0.0162
LD10-1231	56.3741	24.4705	Geotimes	26	51.57	21.77	0.566	0.38	5.46	16.29	0.407	3.19	0.147	99.78	84.17	0.0149
LD10-1231	56.3741	24.4705	Geotimes	27	51.83	21.6	0.501	0.216	5.45	16.41	0.369	2.83	0.16	99.37	84.29	0.0134
LD10-1231	56.3741	24.4705	Geotimes	28	50.72	21.78	0.592	0.328	5.32	16.18	0.789	4.15	0.148	100.01	84.43	0.0154
LD10-1231	56.3741	24.4705	Geotimes	29	51.82	21.24	0.444	0.235	5.39	16.65	0.853	2.73	0.164	99.53	84.63	0.0118
TB2-39C	56.3584	24.6901	Geotimes	1	51.2	19.64	0.67	0.293	10.3	15.32	0.009	1.53	0.259	99.22	72.61	0.0184
TB2-39C	56.3584	24.6901	Geotimes	2	51.59	18.51	0.635	0.3	10.57	15.8	0.003	1.38	0.28	99.07	72.71	0.0175
TB2-39C	56.3584	24.6901	Geotimes	3	51.82	19.94	0.547	0.262	9.7	15.59	0.002	1.23	0.249	99.34	74.13	0.0151
TB2-39C	56.3584	24.6901	Geotimes	4	51.6	20.01	0.565	0.245	9.52	15.49	0.021	1.32	0.26	99.03	74.36	0.0156
TB2-39C	56.3584	24.6901	Geotimes	5	52.16	19.76	0.524	0.28	9.48	15.49	0.008	1.09	0.267	99.06	74.44	0.0145
TB2-39C	56.3584	24.6901	Geotimes	6	52.3	19.17	0.523	0.348	8.93	16.49	0.055	1.24	0.266	99.32	76.7	0.0143
TB2-39C	56.3584	24.6901	Geotimes	7	52.67	18.41	0.404	0.192	9.16	17.08	0.043	0.92	0.283	99.16	76.87	0.0112
TB2-39C	56.3584	24.6901	Geotimes	8	52.11	20.11	0.545	0.213	8.47	16.02	0.042	1.28	0.241	99.03	77.12	0.015
TB2-39C	56.3584	24.6901	Geotimes	9	52.83	18.82	0.386	0.2	8.95	16.98	0.01	0.96	0.294	99.43	77.18	0.0106
TB2-39C	56.3584	24.6901	Geotimes	10	52.66	19.84	0.446	0.235	8.32	16.67	0.046	0.98	0.251	99.45	78.12	0.0122
TB2-40B	56.3616	24.6915	Geotimes	1	48.58	22.11	1.623	0.305	9.93	12.16	0.191	5.59	0.205	100.69	68.58	0.0425
TB2-40B	56.3616	24.6915	Geotimes	2	47.57	21.14	1.626	0.4	10.12	12.4	0.096	5.7	0.222	99.27	68.59	0.043
TB2-40B	56.3616	24.6915	Geotimes	3	49.7	20.67	1.25	0.385	10.51	13.03	0.194	4.02	0.262	100.02	68.85	0.0334
TB2-40B	56.3616	24.6915	Geotimes	4	48.75	21.59	1.469	0.415	10.05	12.68	0.211	4.73	0.235	100.13	69.22	0.0389
TB2-40B	56.3616	24.6915	Geotimes	5	49.67	19.96	1.107	0.372	10.95	13.98	0.123	3.83	0.273	100.27	69.47	0.0295
TB2-40B	56.3616	24.6915	Geotimes	6	47.88	22.11	1.9	0.34	9.19	11.93	0.214	6.04	0.192	99.8	69.82	0.0499
TB2-40B	56.3616	24.6915	Geotimes	7	47.48	22.28	1.69	0.348	9.23	12.18	0.18	6.01	0.184	99.58	70.17	0.0444
TB2-40B	56.3616	24.6915	Geotimes	8	48.94	21.85	1.492	0.383	9.45	12.5	0.156	5.11	0.183	100.06	70.22	0.0394
TB2-40B	56.3616	24.6915	Geotimes	9	47.86	21.54	1.91	0.382	9.3	12.31	0.369	5.7	0.226	99.6	70.23	0.0503
TB2-40B	56.3616	24.6915	Geotimes	10	47.09	22.01	1.79	0.31	9.12	12.09	0.172	6.43	0.184	99.2	70.26	0.047
TB2-40B	56.3616	24.6915	Geotimes	11	48.04	22.28	1.68	0.438	9.17	12.27	0.148	5.91	0.173	100.11	70.46	0.0439
TB2-40B	56.3616	24.6915	Geotimes	12	48.85	20.88	1.91	0.415	9.78	13.1	0.316	5.32	0.214	100.79	70.48	0.0499
TB2-40B	56.3616	24.6915	Geotimes	13	47.83	22.09	1.452	0.392	9.22	12.39	0.134	5.96	0.178	99.65	70.55	0.0381
TB2-40B	56.3616	24.6915	Geotimes	14	48.43	20.75	1.81	0.319	9.65	13.21	0.14	6.05	0.217	100.58	70.93	0.0471
TB2-40B	56.3616	24.6915	Geotimes	15	48.94	21.62	1.4	0.32	9.28	12.73	0.223	5.06	0.203	99.78	70.97	0.0371
TB2-40B	56.3616	24.6915	Geotimes	16	47.91	22.2	2	0.371	8.74	12.29	0.369	6.22	0.173	100.27	71.48	0.052
TB2-40B	56.3616	24.6915	Geotimes	17	48.76	21.54	1.395	0.359	9.02	12.84	0.232	5.89	0.196	100.23	71.73	0.0363
TB2-40B	56.3616	24.6915	Geotimes	18	48.52	21.86	1.525	0.39	8.95	12.77	0.286	5.54	0.165	100.01	71.78	0.04
TB2-40B	56.3616	24.6915	Geotimes	19	47.67	21.74	1.92	0.349	8.57	12.34	0.22	6.67	0.164	99.64	71.96	0.05
TB2-40B	56.3616	24.6915	Geotimes	20	48.78	21.98	1.413	0.373	8.81	12.75	0.224	6.18	0.191	100.7	72.06	0.0365
TB2-40B	56.3616	24.6915	Geotimes	21	48.65	21.84	1.56	0.413	8.74	12.69	0.188	6.14	0.209	100.43	72.13	0.0405
TB2-40B	56.3616	24.6915	Geotimes	22	47.79	22	1.79	0.371	8.56	12.44	0.272	6.39	0.179	99.79	72.15	0.0466
TB2-40B	56.3616	24.6915	Geotimes	23	47.98	21.71	1.8	0.323	8.5	12.41	0.164	6.23	0.167	99.28	72.24	0.0473
TB2-40B	56.3616	24.6915	Geotimes	24	50.19	21.34	1.051	0.354	9.23	13.51	0.157	3.78	0.235	99.85	72.29	0.0281
TB2-40B	56.3616	24.6915	Geotimes	25	47.99	22.07	1.62	0.386	8.48	12.45	0.156	6.68	0.176	100.01	72.35	0.042
TB2-40B	56.3616	24.6915	Geotimes	26	47.11	21.89	1.557	0.388	8.63	12.68	0.191	6.43	0.206	99.08	72.37	0.0407
TB2-40B	56.3616	24.6915	Geotimes	27	47.46	22.09	1.71	0.377	8.56	12.67	0.192	6.37	0.171	99.6	72.51	0.0446
TB2-40B	56.3616	24.6915	Geotimes	28	48.45	22.35	1.87	0.305	8.21	12.35	0.191	6.85	0.167	100.74	72.84	0.0481
TB2-40B	56.3616	24.6915	Geotimes	29	47.91	21.9	1.77	0.36	8.42	12.81	0.245	6.75	0.163	100.33	73.06	0.0456
TB2-40B	56.3616	24.6915	Geotimes	30	48.51	21.87	1.49	0.314	8.36	12.83	0.157	6.13	0.186	99.85	73.23	0.0389
TB2-40B	56.3616	24.6915	Geotimes	31	47.31	21.99	1.81	0.444	8.19	12.57	0.201	6.61	0.18	99.31	73.23	0.0471
TB2-40B	56.3616	24.6915	Geotimes	32	48.63	21.97	1.48	0.33	8.21	12.75	0.136	6.31	0.191	100.01	73.46	0.0385
TB2-40B	56.3616	24.6915	Geotimes	33	48.34	22.04	1.67	0.369	8.08	12.61	0.193	7.09	0.17	100.56	73.56	0.0428
TB2-45C	56.3822	24.6882	Geotimes	1	49.43	17.34	1.274	0.349	13.08	14.23	0.021	4.42	0.334	100.48	65.98	0.0338
TB2-45C	56.3822	24.6882	Geotimes	2	49.86	19.33	1.301	0.338	12.13	13.47	0.022	4.46	0.289	101.2	66.44	0.0343
TB2-45C	56.3822	24.6882	Geotimes	3	49.67	17.19	1.025	0.236	12.94	14.53	0.032	4.35	0.329	100.3	66.68	0.0273
TB2-45C	56.3822	24.6882	Geotimes	4	50.49	17.89	0.968	0.3	12.36	14.76	<0.001	4.17	0.305	101.24	68.04	0.0255
TB2-45C	56.3822	24.6882	Geotimes	5	50.96	17.71	0.913	0.261	12.33	14.76	0.015	3.77	0.322	101.04	68.09	0.0243
TB2-45C	56.3822	24.6882	Geotimes	6	50.66	17.72	0.943	0.188	11.86	14.82	0.009	4.18	0.314	100.69	69.01	0.025
TB2-45C	56.3822	24.6882	Geotimes	7	50.62	17.99	0.881	0.201	11.97	15	0.014	4.18	0.327	101.18	69.08	0.0233
TB2-45C	56.3822	24.6882	Geotimes	8	50.56	18.93	1.009	0.309	11.38	14.27	0.012	4.22	0.306	101	69.09	0.0267
TB2-45C	56.3822	24.6882	Geotimes	9	50.51	19	1.026	0.253	11.27	14.34	0.012	4.14	0.271	100.82	69.4	0.0272
TB2-45C	56.3822	24.6882	Geotimes	10	50.9	19.49	0.837	0.278	10.98	14.3	0.006	4.06	0.282	101.13	69.89	0.0221
TB2-45C	56.3822	24.6882	Geotimes	11	50.93	19.23	0.952	0.333	10.94	14.28	0.022	3.81	0.273	100.77	69.94	0.0253
TB2-45C	56.3822	24.6882	Geotimes	12	51.18	19.31	0.86	0.266	11.15	14.77	<0.001	3.57	0.278	101.38	70.25	0.0228
TB2-45C	56.3822	24.6882	Geotimes	13	50.56	18.93	0.935	0.331	10.77	14.32	0.011	4.5	0.256	100.61	70.33	0.0247
TB2-45C	56.3822	24.6882	Geotimes	14	50.59	17.18	0.896	0.245	11.59	15.56	0.008	4.3	0.297	100.67	70.53	0.0237
TB2-45C	56.3822	24.6882	Geotimes	15	51.33	19.4	0.764	0.27	10.68	14.5	0.019	3.69	0.286	100.94	70.76	0.0203
TB2-45C	56.3822	24.6882	Geotimes	16	51.41	17.72	0.913	0.221	10.95	15.78	0.021	3.77	0.287	101.07	71.98	0.0241
TB2-45C	56.3822	24.6882	Geotimes	17	50.88	19.64	0.854	0.232	10.14	14.68	0.017	4.14	0.249	100.83	72.07	0.0226
TB2-45C	56.3822	24.6882	Geotimes	18	51.04	17.55	0.802	0.251	10.68	15.86	0.009	4.2	0.288	100.68	72.58	0.0211
TB2-45C	56.3822	24.6882	Geotimes	19	51.03	17.49	0.821	0.237	10.85	16.14	0.004	3.93	0.281	100.78	72.61	0.0217
TB2-45C	56.3822	24.6882	Geotimes	20	51.62	17.3	0.728	0.277	10.86	16.17	0.017	3.69	0.312	100.97	72.63	0.0192
TB2-45C	56.3822	24.6882	Geotimes	21	50.82	18.87	0.957	0.261	10.1	15.38	0.015	4.44	0.274	101.12	73.08	0.0251
YV15-15	56.3709	24.7603	Geotimes	1	52.02	19.65	0.947	0.332	9.01	14.85	0.041	3.7	N.M.	100.55	74.61	0.0251
YV15-15	56.3709	24.7603	Geotimes	2	52.17	19.66	0.926	0.344	9.02	14.89	0.009	3.74	N.M.	100.76	74.63	0.0245
YV15-15	56.3709	24.7603	Geotimes	3	52.57	18.32	0.869	0.343	9.45	15.85	0.017	3.11	N.M.	100.53	74.93	0.0231
YV15-15	56.3709	24.7603	Geotimes	4	52.81	18.68	0.73	0.356	8.81	15.88	0.025	3.44	N.M.	100.73	76.26	0.0193
YV15-15	56.3709	24.7603	Geotimes	5	53.47	16.94	0.676	0.29	9.3	16.96	0.011	2.89	N.M.	100.54	76.47	0.018
YV15-15	56.3709	24.7603	Geotimes	6	52.76	18.69	0.84	0.273	8.62	16.21	<0.001	3.4	N.M.	100.79	77.02	0.0222
YV15-15	56.3709	24.7603	Geotimes	7	53.25	17.19	0.661	0.292	9.07	17.22	0.014	3	N.M.	100.7	77.19	0.0175
YV15-15	56.3709	24.7603	Geotimes	8	53.06	18.81	0.761	0.222	8.32	15.83	0.016	3.47	N.M.	100.49	77.23	0.0202
YV15-15	56.3709	24.7603	Geotimes	9	52.98	18.85	0.739	0.283	8.47	16.17	0.016	3.41	N.M.	100.92	77.29	0.0195
YV15-15	56.3709	24.7603	Geotimes	10	52.71	18.97	0.784	0.308	8.31	15.93	<0.001	3.53	N.M.	100.54	77.36	0.0207
YV15-15	56.3709	24.7603	Geotimes	11	53.1	18.66	0.7	0.309	8.38	16.13	0.005	3.44	N.M.	100.72	77.43	0.0185
YV15-15	56.3709	24.7603	Geotimes	12	53.57	17.28	0.632	0.24	8.97	17.27	0.019	2.8	N.M.	100.78	77.44	0.0168
YV15-15	56.3709	24.7603	Geotimes	13	52.87	19.2	0.783	0.255	8.25	15.93	0.016	3.57	N.M.	100.87	77.49	0.0206
YV15-15	56.3709	24.7603	Geotimes	14	52.93	19.17	0.769	0.292	8.23	15.91	0.002	3.41	N.M.	100.71	77.51	0.0203
YV15-15	56.3709	24.7603	Geotimes	15	53.7	17.63	0.614	0.276	8.8	17.04	0.012	2.62	N.M.	100.69	77.54	0.0163
YV15-15	56.3709	24.7603	Geotimes	16	53.04	17.42	0.591	0.239	8.84	17.13	0.003	2.69	N.M.	99.95	77.55	0.0158
YV15-15	56.3709	24.7603	Geotimes	17	53.31	18.76	0.7	0.215	8.35	16.26	0.009	3.1	N.M.	100.7	77.63	0.0186
YV15-15	56.3709	24.7603	Geotimes	18	53.38	17.27	0.637	0.318	8.82	17.18	0.014	2.8	N.M.	100.42	77.64	0.0169
YV15-15	56.3709	24.7603	Geotimes	19	53.95	18.85	0.641	0.254	8.31	16.32	0.012	2.6	N.M.	100.94	77.78	0.0171
YV15-15	56.3709	24.7603	Geotimes	20	54.75	19.44	0.378	0.411	8.06	15.9	<0.001	1.66	N.M.	100.6	77.86	0.0102
YV15-15	56.3709	24.7603	Geotimes	21	54.54	16.42	0.444	0.219	9.05	17.88	0.023	1.55	N.M.	100.13	77.88	0.012
YV15-15	56.3709	24.7603	Geotimes	22	54.02	18.3	0.571	0.244	8.53	16.87	<0.001	2.41	N.M.	100.95	77.9	0.0152
YV15-15	56.3709	24.7603	Geotimes	23	53.34	19.44	0.737	0.325	8.04	15.98	<0.001	3.08	N.M.	100.94	77.99	0.0195
YV15-15	56.3709	24.7603	Geotimes	24	54.34	18.13	0.443	0.238	8.52	17.05	0.017	1.93	N.M.	100.67	78.1	0.0119
YV15-15	56.3709	24.7603	Geotimes	25	53.3	18.85	0.674	0.258	8.23	16.48	<0.001	2.91	N.M.	100.7	78.11	0.0179
YV15-15	56.3709	24.7603	Geotimes	26	53.66	19.07	0.666	0.246	8.09	16.26	0.001	2.86	N.M.	100.85	78.18	0.0177
YV15-15	56.3709	24.7603	Geotimes	27	54.71	16.41	0.406	0.225	8.93	18.04	0.012	1.57	N.M.	100.3	78.26	0.0109
YV15-15	56.3709	24.7603	Geotimes	28	54.63	17.16	0.41	0.213	8.76	17.89	0.012	1.57	N.M.	100.65	78.45	0.011
YV15-15	56.3709	24.7603	Geotimes	29	53.41	19.11	0.594	0.363	8.02	16.38	0.021	2.6	N.M.	100.5	78.45	0.0158
YV15-15	56.3709	24.7603	Geotimes	30	54.35	18.04	0.467	0.182	8.56	17.6	<0.001	1.61	N.M.	100.81	78.56	0.0125
YV15-15	56.3709	24.7603	Geotimes	31	53.94	19.33	0.55	0.239	8.04	16.57	0.025	2.16	N.M.	100.85	78.6	0.0147
YV15-15	56.3709	24.7603	Geotimes	32	54.55	16.9	0.399	0.211	8.86	18.3	<0.001	1.59	N.M.	100.81	78.64	0.0107
YV15-15	56.3709	24.7603	Geotimes	33	53.82	19.43	0.604	0.219	7.89	16.32	0.024	2.48	N.M.	100.79	78.66	0.0161
YV15-15	56.3709	24.7603	Geotimes	34	53.76	19.67	0.602	0.245	7.77	16.25	0.029	2.58	N.M.	100.91	78.85	0.016
YV15-15	56.3709	24.7603	Geotimes	35	54.18	19.45	0.486	0.275	7.88	16.52	0.001	2.06	N.M.	100.85	78.89	0.013
YV15-15	56.3709	24.7603	Geotimes	36	53.43	20.04	0.665	0.295	7.58	15.95	0.003	2.82	N.M.	100.78	78.95	0.0177
YV15-15	56.3709	24.7603	Geotimes	37	54.06	19.36	0.592	0.226	7.79	16.4	0.008	2.53	N.M.	100.97	78.96	0.0158
YV15-15	56.3709	24.7603	Geotimes	38	53.75	19.64	0.612	0.275	7.69	16.23	0.029	2.59	N.M.	100.82	79	0.0163
YV15-15	56.3709	24.7603	Geotimes	39	54.35	18.83	0.5	0.271	7.95	16.81	<0.001	2.1	N.M.	100.81	79.03	0.0134
YV15-15	56.3709	24.7603	Geotimes	40	54.33	19.51	0.487	0.252	7.7	16.61	0.02	1.89	N.M.	100.8	79.36	0.013
AB16-4602	56.458	24.6151	Lasail	1	50.63	20.95	0.657	0.187	5.49	15.73	0.608	5.29	0.136	99.68	83.63	0.017
AB16-4602	56.458	24.6151	Lasail	2	53.15	17.82	0.264	0.058	6.32	19.73	0.212	2.63	0.183	100.37	84.77	0.007
AB16-4602	56.458	24.6151	Lasail	3	51.28	21.04	0.337	0.161	5.2	16.3	0.674	4.21	0.15	99.35	84.82	0.0089
AB16-4602	56.458	24.6151	Lasail	4	51.39	20.13	0.352	0.129	5.18	16.3	1.066	3.97	0.148	98.67	84.87	0.0093
AB16-4602	56.458	24.6151	Lasail	5	51	20.96	0.331	0.217	5.11	16.35	0.712	4.13	0.136	98.95	85.08	0.0087
AB16-4602	56.458	24.6151	Lasail	6	50.91	21.28	0.519	0.162	5.19	16.62	1.123	4.46	0.154	100.42	85.09	0.0134
AB16-4602	56.458	24.6151	Lasail	7	51.86	21.42	0.334	0.24	5.17	16.58	0.635	4.21	0.129	100.58	85.11	0.0086
AB16-4602	56.458	24.6151	Lasail	8	51.71	21.12	0.344	0.249	5.23	16.87	0.514	4.16	0.117	100.31	85.18	0.0089
AB16-4602	56.458	24.6151	Lasail	9	53.22	20.06	0.222	0.141	5.31	18.23	0.34	2.2	0.159	99.88	85.95	0.0059
AB16-4602	56.458	24.6151	Lasail	10	53.46	19.41	0.217	0.121	5.34	18.5	0.368	1.84	0.162	99.42	86.06	0.0058
AB16-4602	56.458	24.6151	Lasail	11	53.08	19.9	0.2	0.128	5.19	18.33	0.444	1.86	0.159	99.29	86.29	0.0054
AB16-4602	56.458	24.6151	Lasail	12	52	21.47	0.326	0.202	4.59	16.33	1.068	3.53	0.137	99.65	86.38	0.0086
AB16-4602	56.458	24.6151	Lasail	13	53.4	19.64	0.224	0.093	5.12	18.41	0.439	1.92	0.162	99.41	86.5	0.006
AB16-4602	56.458	24.6151	Lasail	14	51.71	21.66	0.304	0.145	4.46	16.1	1.135	3.6	0.121	99.24	86.55	0.008
AB16-4602	56.458	24.6151	Lasail	15	51.74	21.3	0.334	0.149	4.49	16.27	1.106	3.71	0.12	99.22	86.59	0.0088
AB16-4602	56.458	24.6151	Lasail	16	53.78	19.57	0.205	0.191	5.02	18.24	0.563	1.74	0.167	99.48	86.62	0.0055
AB16-4602	56.458	24.6151	Lasail	17	51.93	22.04	0.303	0.214	4.51	16.4	1.132	3.62	0.137	100.29	86.63	0.0079
AB16-4602	56.458	24.6151	Lasail	18	53.15	20.48	0.221	0.09	4.72	17.27	0.605	1.82	0.164	98.52	86.71	0.006
AB16-4602	56.458	24.6151	Lasail	19	53.38	20.56	0.238	0.202	4.68	17.3	0.588	1.82	0.141	98.91	86.82	0.0064
AB16-4602	56.458	24.6151	Lasail	20	53.56	20.85	0.212	0.088	4.62	17.16	0.68	1.82	0.124	99.11	86.88	0.0057
AB16-4602	56.458	24.6151	Lasail	21	53.94	19.79	0.207	0.126	4.91	18.25	0.565	1.81	0.169	99.77	86.89	0.0055
AB16-4602	56.458	24.6151	Lasail	22	53.39	20.83	0.206	0.116	4.47	17.04	0.675	1.92	0.142	98.79	87.17	0.0056
AB16-4602	56.458	24.6151	Lasail	23	52.01	21.63	0.29	0.144	4.4	16.83	1.122	3.4	0.114	99.94	87.21	0.0076
AB16-4602	56.458	24.6151	Lasail	24	53.27	21.11	0.194	0.123	4.39	17.15	0.665	1.91	0.135	98.95	87.44	0.0052
AB16-4602	56.458	24.6151	Lasail	25	53.44	21.32	0.181	0.165	4.51	18.03	0.649	1.92	0.126	100.34	87.69	0.0048
AB16-4602	56.458	24.6151	Lasail	26	53.39	21.51	0.219	0.188	4.42	17.71	0.745	2.13	0.14	100.45	87.72	0.0058
AB16-4602	56.458	24.6151	Lasail	27	53.25	20.89	0.213	0.163	4.34	17.39	0.723	2.11	0.136	99.22	87.72	0.0057
AB16-4602	56.458	24.6151	Lasail	28	53.38	20.95	0.221	0.127	4.57	18.32	0.689	1.82	0.135	100.21	87.72	0.0059
AB16-4602	56.458	24.6151	Lasail	29	53.77	21.03	0.189	0.144	4.53	18.22	0.691	1.82	0.149	100.54	87.76	0.005
AB16-4602	56.458	24.6151	Lasail	30	53.61	21.25	0.201	0.2	4.45	18.16	0.673	1.92	0.145	100.61	87.91	0.0053
LD10-1211	56.4509	24.5603	Lasail	1	53.89	18.51	0.266	0.108	7.52	18.38	0.025	1.6	0.23	100.53	81.33	0.0071
LD10-1211	56.4509	24.5603	Lasail	2	51.86	19.6	0.66	0.253	6.71	16.74	0.217	4.51	0.17	100.72	81.64	0.0171
LD10-1211	56.4509	24.5603	Lasail	3	51.61	19.84	0.477	0.17	6.71	17.1	0.103	3.62	0.215	99.85	81.96	0.0126
LD10-1211	56.4509	24.5603	Lasail	4	52.34	20.11	0.535	0.19	6.57	16.85	0.145	3.86	0.179	100.78	82.05	0.014
LD10-1211	56.4509	24.5603	Lasail	5	52.76	20.53	0.384	0.164	6.35	16.86	0.111	3.1	0.185	100.44	82.56	0.0101
LD10-1211	56.4509	24.5603	Lasail	6	51.98	19.57	0.529	0.201	6.35	17.01	0.208	4.4	0.172	100.42	82.68	0.0138
LD10-1211	56.4509	24.5603	Lasail	7	51.16	20.36	0.48	0.173	6.34	17.01	0.106	3.63	0.171	99.43	82.71	0.0127
LD10-1211	56.4509	24.5603	Lasail	8	53.2	19.4	0.378	0.121	6.39	17.49	0.137	3.39	0.183	100.69	82.99	0.0099
LD10-1211	56.4509	24.5603	Lasail	9	53.45	18.52	0.237	0.084	6.81	19.13	0.094	1.51	0.224	100.06	83.35	0.0064
LD10-1211	56.4509	24.5603	Lasail	10	53.17	20.67	0.403	0.178	6.06	17.04	0.161	2.9	0.167	100.75	83.37	0.0106
LD10-1211	56.4509	24.5603	Lasail	11	52.37	19.32	0.492	0.18	6.02	17.46	0.259	4.23	0.174	100.51	83.79	0.0128
LD10-1211	56.4509	24.5603	Lasail	12	53.54	18.09	0.238	0.114	6.55	19.19	0.092	1.56	0.212	99.59	83.93	0.0064
LD10-1211	56.4509	24.5603	Lasail	13	52.81	19.85	0.382	0.133	5.92	17.49	0.241	3.65	0.159	100.64	84.04	0.01
LD10-1211	56.4509	24.5603	Lasail	14	52.17	19.2	0.413	0.162	6.11	18.14	0.309	3.72	0.15	100.37	84.11	0.0108
LD10-1211	56.4509	24.5603	Lasail	15	52.69	19.87	0.399	0.151	5.77	17.15	0.177	3.59	0.177	99.97	84.12	0.0105
LD10-1211	56.4509	24.5603	Lasail	16	54.02	19.06	0.268	0.161	6.24	18.63	0.099	2.01	0.186	100.67	84.18	0.0071
LD10-1211	56.4509	24.5603	Lasail	17	53.49	19.05	0.215	0.115	6.3	18.95	0.103	1.61	0.202	100.04	84.28	0.0058
LD10-1211	56.4509	24.5603	Lasail	18	53.52	19.13	0.246	0.138	6.22	18.95	0.095	1.53	0.196	100.03	84.45	0.0066
LD10-1211	56.4509	24.5603	Lasail	19	52.91	20.65	0.384	0.198	5.67	17.5	0.188	2.8	0.147	100.45	84.62	0.0101
LD10-1211	56.4509	24.5603	Lasail	20	54.01	20.71	0.287	0.091	5.68	17.54	0.082	2.15	0.159	100.71	84.63	0.0076
LD10-1211	56.4509	24.5603	Lasail	21	50.24	21	0.488	0.212	5.38	16.95	0.197	4.65	0.148	99.27	84.88	0.0127
LD10-1211	56.4509	24.5603	Lasail	22	52.22	20.03	0.468	0.13	5.4	17.17	0.314	4.22	0.143	100.1	85	0.0122
LD10-1211	56.4509	24.5603	Lasail	23	53.26	20.73	0.332	0.147	5.51	17.57	0.277	2.86	0.145	100.83	85.04	0.0087
LD10-1211	56.4509	24.5603	Lasail	24	52.4	20	0.385	0.162	5.45	17.4	0.377	3.9	0.151	100.23	85.05	0.0101
LD10-1211	56.4509	24.5603	Lasail	25	53.47	20.69	0.279	0.11	5.5	17.8	0.175	2.23	0.153	100.41	85.23	0.0074
LD10-1211	56.4509	24.5603	Lasail	26	52.35	19.89	0.442	0.154	5.41	17.72	0.403	4.23	0.175	100.77	85.38	0.0114
LD10-1211	56.4509	24.5603	Lasail	27	52.39	20.44	0.398	0.183	5.23	17.28	0.37	3.73	0.155	100.18	85.48	0.0104
LD10-1211	56.4509	24.5603	Lasail	28	52.54	17.99	0.198	0.181	5.96	20.41	0.245	1.8	0.216	99.54	85.92	0.0053
LD10-1211	56.4509	24.5603	Lasail	29	53.96	17.67	0.199	0.15	5.61	20.51	0.287	1.62	0.201	100.21	86.7	0.0053
LD10-1221	56.4548	24.5631	Lasail	1	51.12	21.02	0.467	0.157	6.65	15.78	0.092	4.05	0.179	99.52	80.88	0.0124
LD10-1221	56.4548	24.5631	Lasail	2	50.85	21.16	0.506	0.19	5.81	16.13	0.303	4.39	0.15	99.49	83.19	0.0133
LD10-1221	56.4548	24.5631	Lasail	3	51.13	21.06	0.374	0.143	5.86	16.38	0.319	4.09	0.143	99.5	83.28	0.0099
LD10-1221	56.4548	24.5631	Lasail	4	51.1	21.62	0.413	0.154	5.7	15.98	0.327	4.02	0.135	99.45	83.33	0.0109
LD10-1221	56.4548	24.5631	Lasail	5	51.68	21.14	0.342	0.137	5.62	17.02	0.321	3.62	0.143	100.02	84.37	0.009
LD10-1221	56.4548	24.5631	Lasail	6	51.36	21.85	0.368	0.173	5.28	16.28	0.501	3.82	0.134	99.77	84.61	0.0097
LD10-1221	56.4548	24.5631	Lasail	7	51.84	21.58	0.31	0.159	5.26	16.68	0.412	3.37	0.141	99.75	84.97	0.0082
LD10-1221	56.4548	24.5631	Lasail	8	51.45	21.36	0.357	0.152	5.27	16.77	0.393	3.64	0.149	99.54	85.01	0.0094
LD10-1221	56.4548	24.5631	Lasail	9	53.34	19.69	0.198	0.186	5.46	18.67	0.209	1.71	0.17	99.63	85.91	0.0053
LD10-1221	56.4548	24.5631	Lasail	10	51.81	21.82	0.272	0.186	4.84	16.69	0.425	3.14	0.148	99.33	86.01	0.0072
LD10-1221	56.4548	24.5631	Lasail	11	51.88	21.72	0.294	0.155	4.87	16.93	0.41	3.03	0.138	99.43	86.1	0.0078
LD10-1221	56.4548	24.5631	Lasail	12	51.77	21.63	0.284	0.161	4.84	16.95	0.402	2.88	0.131	99.05	86.19	0.0076
LD10-1221	56.4548	24.5631	Lasail	13	52.26	21.48	0.276	0.169	4.9	17.17	0.422	2.83	0.14	99.65	86.2	0.0073
LD10-1221	56.4548	24.5631	Lasail	14	52.56	21.98	0.249	0.195	4.77	17.12	0.412	2.76	0.135	100.18	86.48	0.0066
LD10-1221	56.4548	24.5631	Lasail	15	52.2	21.89	0.252	0.123	4.69	16.9	0.368	2.66	0.12	99.2	86.53	0.0067
LD10-1221	56.4548	24.5631	Lasail	16	53.02	21.57	0.229	0.139	4.73	17.12	0.377	2.57	0.122	99.88	86.58	0.0061
LD10-1221	56.4548	24.5631	Lasail	17	53.5	20.82	0.178	0.165	4.97	17.99	0.326	2.12	0.17	100.24	86.58	0.0047
LD10-1221	56.4548	24.5631	Lasail	18	52.04	21.81	0.261	0.185	4.65	16.86	0.43	2.7	0.128	99.06	86.6	0.007
LD10-1221	56.4548	24.5631	Lasail	19	52.5	21.75	0.251	0.163	4.63	17.07	0.404	2.67	0.128	99.57	86.79	0.0067
LD10-1221	56.4548	24.5631	Lasail	20	52.52	22.11	0.207	0.154	4.52	17.07	0.422	2.55	0.116	99.67	87.07	0.0055
TB2-33A	56.4249	24.2596	Lasail	1	52.72	19.9	0.296	0.087	7.47	16.81	0.09	1.48	0.196	99.05	80.04	0.0081
TB2-33A	56.4249	24.2596	Lasail	2	54.09	19.08	0.172	0.072	7.81	17.82	0.032	0.62	0.22	99.92	80.26	0.0047
TB2-33A	56.4249	24.2596	Lasail	3	53.41	20.43	0.245	0.109	7.37	16.93	0.031	0.97	0.168	99.66	80.37	0.0067
TB2-33A	56.4249	24.2596	Lasail	4	53.09	20.6	0.286	0.141	7.16	16.73	0.082	1.4	0.201	99.69	80.64	0.0078
TB2-33A	56.4249	24.2596	Lasail	5	53.01	19.93	0.28	0.159	7.14	16.95	0.063	1.34	0.221	99.09	80.88	0.0077
TB2-33A	56.4249	24.2596	Lasail	6	52.95	20.34	0.25	0.117	7.01	17.19	0.07	1.27	0.182	99.38	81.38	0.0068
TB2-33A	56.4249	24.2596	Lasail	7	52.91	21.1	0.255	0.156	6.51	16.4	0.081	1.42	0.188	99.02	81.79	0.007
TB2-33A	56.4249	24.2596	Lasail	8	54.77	18.03	0.123	0.005	6.34	19.78	0.001	0.64	0.201	99.89	84.76	0.0033
TB2-33A	56.4249	24.2596	Lasail	9	54.55	18.47	0.126	0.069	6.11	19.31	0.006	0.69	0.204	99.54	84.92	0.0034
TB2-33A	56.4249	24.2596	Lasail	10	53.21	20.22	0.235	0.128	5.63	17.99	0.01	1.46	0.166	99.05	85.06	0.0064
TB2-33A	56.4249	24.2596	Lasail	11	54.7	18.97	0.139	0.076	5.98	19.44	0.031	0.65	0.183	100.17	85.28	0.0038
TB2-33A	56.4249	24.2596	Lasail	12	55.38	18.27	0.124	0.032	5.91	19.71	0.023	0.6	0.189	100.24	85.6	0.0034
TB2-33A	56.4249	24.2596	Lasail	13	54.18	22.47	0.124	0.138	3.86	17.73	0.121	0.98	0.094	99.7	89.12	0.0033
TB2-33A	56.4249	24.2596	Lasail	14	54.37	22.75	0.126	0.095	3.71	17.72	0.218	0.94	0.108	100.04	89.49	0.0034
TB2-33A	56.4249	24.2596	Lasail	15	54.25	22.69	0.088	0.136	3.35	17.91	0.279	0.84	0.094	99.64	90.5	0.0024
TB2-33A	56.4249	24.2596	Lasail	16	54.76	22.97	0.076	0.048	3.01	18.03	0.321	0.79	0.071	100.08	91.44	0.0021
TB2-33A	56.4249	24.2596	Lasail	17	54.58	22.84	0.076	0.121	3	18.14	0.517	0.72	0.095	100.09	91.51	0.0021
TB2-33A	56.4249	24.2596	Lasail	18	53.98	22.86	0.09	0.039	2.92	17.89	0.412	1.13	0.076	99.4	91.61	0.0024
TB2-33A	56.4249	24.2596	Lasail	19	54.88	23.21	0.069	0.077	2.91	18.26	0.369	0.73	0.101	100.61	91.79	0.0019
TB2-33A	56.4249	24.2596	Lasail	20	54.96	22.83	0.064	0.109	2.89	18.36	0.624	0.57	0.084	100.49	91.89	0.0017
TB2-33A	56.4249	24.2596	Lasail	21	51.25	17.57	0.458	0.188	14.88	13.93	0.011	1.14	0.348	99.78	62.53	0.0128
TB2-33A	56.4249	24.2596	Lasail	22	51.43	18.27	0.476	0.188	14.36	13.49	0.004	1.18	0.317	99.72	62.61	0.0133
TB2-33A	56.4249	24.2596	Lasail	23	51.45	17.19	0.453	0.143	14.66	13.88	0.008	1.14	0.349	99.27	62.79	0.0128
TB2-35C	56.3684	24.6712	Lasail	1	49.79	20.54	1.039	0.202	6.74	15.44	0.083	5.61	0.159	99.6	80.33	0.0271
TB2-35C	56.3684	24.6712	Lasail	2	50.98	19.32	0.739	0.159	6.86	16.66	0.118	4.71	0.177	99.72	81.23	0.0193
TB2-35C	56.3684	24.6712	Lasail	3	50.9	20.33	0.707	0.143	6.59	16.02	0.043	4.2	0.175	99.11	81.25	0.0188
TB2-35C	56.3684	24.6712	Lasail	4	50.16	20.88	0.804	0.129	6.41	15.67	0.076	4.9	0.181	99.21	81.33	0.0212
TB2-35C	56.3684	24.6712	Lasail	5	51.25	20.28	0.44	0.155	6.65	16.77	0.155	3.13	0.167	99	81.8	0.0118
TB2-35C	56.3684	24.6712	Lasail	6	50.54	19.98	0.675	0.218	6.45	16.62	0.066	4.43	0.174	99.15	82.12	0.0178
TB2-35C	56.3684	24.6712	Lasail	7	50.27	21.42	0.92	0.236	6.06	15.64	0.142	5.11	0.112	99.91	82.14	0.024
TB2-35C	56.3684	24.6712	Lasail	8	51.42	19.84	0.66	0.222	6.43	16.7	0.156	4.4	0.155	99.98	82.24	0.0172
TB2-35C	56.3684	24.6712	Lasail	9	51.89	18.44	0.465	0.218	6.88	18.24	0.127	3.14	0.2	99.6	82.53	0.0123
TB2-35C	56.3684	24.6712	Lasail	10	50.89	20.76	0.657	0.179	6.1	16.44	0.117	4.39	0.151	99.68	82.77	0.0173
TB2-35C	56.3684	24.6712	Lasail	11	50.79	20.92	0.67	0.124	6.06	16.34	0.149	4.6	0.16	99.81	82.78	0.0175
TB2-35C	56.3684	24.6712	Lasail	12	51.51	20.51	0.551	0.249	6.02	16.51	0.104	3.7	0.161	99.32	83.02	0.0146
TB2-35C	56.3684	24.6712	Lasail	13	51.24	20.16	0.527	0.201	6.09	16.86	0.145	3.62	0.169	99.01	83.15	0.014
TB2-35C	56.3684	24.6712	Lasail	14	51.16	20.67	0.575	0.224	6.07	16.93	0.165	4.03	0.17	99.99	83.25	0.0151
TB2-35C	56.3684	24.6712	Lasail	15	51.36	20.33	0.604	0.2	5.96	16.88	0.229	3.86	0.163	99.59	83.47	0.0159
TB2-35C	56.3684	24.6712	Lasail	16	51.23	20.45	0.588	0.15	5.92	16.87	0.162	4.01	0.155	99.54	83.55	0.0155
TB2-35C	56.3684	24.6712	Lasail	17	51.4	20.83	0.473	0.218	5.78	16.49	0.254	3.86	0.171	99.48	83.57	0.0125
TB2-35C	56.3684	24.6712	Lasail	18	51.32	21.36	0.534	0.183	5.7	16.36	0.169	3.57	0.154	99.35	83.65	0.0142
TB2-35C	56.3684	24.6712	Lasail	19	51.33	21.56	0.505	0.208	5.63	16.18	0.149	3.59	0.126	99.28	83.67	0.0134
TB2-35C	56.3684	24.6712	Lasail	20	51.9	21.11	0.449	0.139	5.81	16.78	0.132	3.26	0.133	99.71	83.73	0.0119
TB2-35C	56.3684	24.6712	Lasail	21	51.54	20.33	0.592	0.169	5.86	16.95	0.186	3.66	0.181	99.47	83.75	0.0157
TB2-35C	56.3684	24.6712	Lasail	22	51.72	20.98	0.472	0.22	5.7	16.52	0.13	3.88	0.171	99.79	83.78	0.0124
TB2-35C	56.3684	24.6712	Lasail	23	52.26	20.79	0.466	0.076	5.84	16.95	0.144	3.1	0.167	99.79	83.8	0.0124
TB2-35C	56.3684	24.6712	Lasail	24	50.93	20.77	0.598	0.17	5.72	16.62	0.188	4.03	0.169	99.2	83.82	0.0158
TB2-35C	56.3684	24.6712	Lasail	25	51.5	20.98	0.479	0.183	5.83	16.96	0.208	3.55	0.139	99.83	83.83	0.0126
TB2-35C	56.3684	24.6712	Lasail	26	51.21	21.2	0.606	0.118	5.67	16.55	0.31	4	0.159	99.82	83.88	0.0159
TB2-35C	56.3684	24.6712	Lasail	27	51.59	20.38	0.586	0.208	5.85	17.08	0.289	4.13	0.183	100.3	83.88	0.0153
TB2-35C	56.3684	24.6712	Lasail	28	50.95	20.42	0.546	0.2	5.77	16.85	0.267	3.9	0.156	99.06	83.88	0.0144
TB2-35C	56.3684	24.6712	Lasail	29	51.65	21.11	0.514	0.208	5.62	16.46	0.199	3.73	0.139	99.63	83.92	0.0136
TB2-35C	56.3684	24.6712	Lasail	30	51.72	21.01	0.54	0.189	5.53	16.27	0.237	3.66	0.14	99.3	83.99	0.0143
TB2-35C	56.3684	24.6712	Lasail	31	52.04	21.1	0.487	0.196	5.68	16.8	0.188	3.17	0.158	99.82	84.06	0.0129
TB2-35C	56.3684	24.6712	Lasail	32	51.8	20.8	0.46	0.193	5.62	16.66	0.241	4.07	0.132	99.98	84.09	0.012
TB2-35C	56.3684	24.6712	Lasail	33	51.27	21.9	0.525	0.214	5.43	16.24	0.172	3.19	0.15	99.09	84.2	0.014
TB2-35C	56.3684	24.6712	Lasail	34	51.02	21.5	0.55	0.139	5.44	16.36	0.204	3.86	0.131	99.2	84.28	0.0146
TB2-35C	56.3684	24.6712	Lasail	35	51.27	21.32	0.435	0.187	5.55	16.74	0.293	3.49	0.135	99.42	84.32	0.0115
TB2-35C	56.3684	24.6712	Lasail	36	52	20.07	0.451	0.122	5.82	17.57	0.335	3.63	0.172	100.17	84.33	0.0118
TB2-35C	56.3684	24.6712	Lasail	37	51.61	19.79	0.502	0.245	5.8	17.7	0.289	3.84	0.161	99.94	84.47	0.0131
TB2-35C	56.3684	24.6712	Lasail	38	52.74	19.09	0.325	0.138	6.02	18.52	0.094	1.93	0.19	99.05	84.58	0.0088
TB2-35C	56.3684	24.6712	Lasail	39	52.3	21.79	0.414	0.133	5.37	16.72	0.196	3.03	0.141	100.09	84.73	0.011
TB2-35C	56.3684	24.6712	Lasail	40	51.64	21.08	0.435	0.178	5.39	16.82	0.233	3.27	0.14	99.19	84.76	0.0116
TB2-35C	56.3684	24.6712	Lasail	41	52.8	21.26	0.314	0.208	5.47	17.17	0.143	2.14	0.163	99.67	84.84	0.0084
TB2-35C	56.3684	24.6712	Lasail	42	51.9	21.72	0.412	0.175	5.32	16.76	0.229	3.03	0.133	99.68	84.88	0.0109
TB2-35C	56.3684	24.6712	Lasail	43	52.12	21.7	0.391	0.198	5.26	16.79	0.207	2.96	0.142	99.77	85.05	0.0104
TB2-35C	56.3684	24.6712	Lasail	44	52.82	21.58	0.389	0.107	5.27	17.04	0.171	2.76	0.142	100.28	85.21	0.0103
TB2-35C	56.3684	24.6712	Lasail	45	52.87	21.93	0.312	0.12	5.28	17.24	0.169	2.12	0.141	100.18	85.34	0.0083
TB2-35C	56.3684	24.6712	Lasail	46	52.51	21.19	0.372	0.099	5.27	17.24	0.215	2.9	0.13	99.93	85.36	0.0099
TB2-35C	56.3684	24.6712	Lasail	47	52.39	22.05	0.407	0.192	5	16.72	0.22	2.85	0.149	99.98	85.63	0.0108
TB2-35C	56.3684	24.6712	Lasail	48	52.53	21.71	0.38	0.201	4.95	16.81	0.221	3.15	0.142	100.09	85.82	0.01
TB2-35C	56.3684	24.6712	Lasail	49	53.26	21.31	0.287	0.168	5.16	17.6	0.162	1.91	0.151	100.01	85.88	0.0077
TB2-35C	56.3684	24.6712	Lasail	50	53.72	21.31	0.292	0.126	5.07	17.52	0.14	1.95	0.145	100.27	86.03	0.0078
TB2-35C	56.3684	24.6712	Lasail	51	53.31	21.94	0.255	0.142	4.75	17.14	0.111	1.9	0.14	99.69	86.54	0.0069
TB2-35C	56.3684	24.6712	Lasail	52	53.19	21.7	0.288	0.168	4.73	17.33	0.167	2.3	0.133	100.01	86.72	0.0077
TB2-38A	56.3859	24.7485	Lasail	1	53.14	20.05	0.341	0.246	5.41	18.14	0.434	3.96	0.146	101.87	85.67	0.0087
TB2-38A	56.3859	24.7485	Lasail	2	52.61	20.7	0.417	0.173	5.2	17.57	0.281	4.54	0.143	101.63	85.76	0.0107
TB2-38A	56.3859	24.7485	Lasail	3	52.58	20.36	0.432	0.183	5.2	17.85	0.371	4.56	0.122	101.66	85.95	0.011
TB2-38A	56.3859	24.7485	Lasail	4	52.7	20.84	0.418	0.137	5.08	17.57	0.23	4.45	0.136	101.56	86.04	0.0107
TB2-38A	56.3859	24.7485	Lasail	5	52.77	20.51	0.382	0.159	5.06	17.87	0.287	4.28	0.146	101.46	86.29	0.0098
TB2-38A	56.3859	24.7485	Lasail	6	53.33	19.82	0.286	0.184	5.05	18.46	0.681	3.81	0.146	101.77	86.69	0.0073
TB2-38A	56.3859	24.7485	Lasail	7	55	19.47	0.208	0.139	5.24	19.7	0.214	1.9	0.152	102.02	87.02	0.0054
TB2-38A	56.3859	24.7485	Lasail	8	54.9	19.32	0.195	0.099	5.15	19.7	0.261	1.81	0.147	101.58	87.21	0.0051
TB2-38A	56.3859	24.7485	Lasail	9	53.15	21.21	0.287	0.187	4.51	17.72	0.783	3.47	0.122	101.44	87.51	0.0074
TB2-38A	56.3859	24.7485	Lasail	10	55.07	20.28	0.175	0.126	4.55	19.37	0.365	1.69	0.148	101.77	88.36	0.0046
TB2-39A	56.3642	24.6884	Lasail	1	51.86	20.46	0.522	0.198	7.31	16.41	0.019	3.27	0.179	100.23	80.01	0.0138
TB2-39A	56.3642	24.6884	Lasail	2	51.98	20.21	0.565	0.181	6.98	16.35	0.044	3.66	0.171	100.14	80.68	0.0149
TB2-39A	56.3642	24.6884	Lasail	3	51.7	20.23	0.593	0.266	6.34	16.69	0.295	4.22	0.168	100.5	82.43	0.0154
TB2-39A	56.3642	24.6884	Lasail	4	51.61	20.59	0.563	0.196	6.13	16.27	0.187	4.11	0.14	99.8	82.55	0.0148
TB2-39A	56.3642	24.6884	Lasail	5	51.21	20.69	0.497	0.23	6.12	16.39	0.142	4.34	0.17	99.79	82.68	0.013
TB2-39A	56.3642	24.6884	Lasail	6	52.13	20.42	0.528	0.232	6.19	16.67	0.323	3.7	0.166	100.36	82.76	0.0139
TB2-39A	56.3642	24.6884	Lasail	7	50.99	20.95	0.62	0.191	6.15	16.6	0.15	4.29	0.158	100.1	82.79	0.0162
TB2-39A	56.3642	24.6884	Lasail	8	51.13	21.02	0.653	0.223	6.09	16.53	0.297	4.26	0.164	100.37	82.87	0.017
TB2-39A	56.3642	24.6884	Lasail	9	51.67	21.04	0.552	0.281	5.77	16.35	0.365	3.96	0.166	100.15	83.47	0.0144
TB2-39A	56.3642	24.6884	Lasail	10	52.35	20.43	0.42	0.205	5.82	16.75	0.37	3.4	0.175	99.92	83.69	0.0111
TB2-39A	56.3642	24.6884	Lasail	11	54.05	18.44	0.289	0.151	6.55	18.86	0.096	1.86	0.204	100.5	83.69	0.0077
TB2-39A	56.3642	24.6884	Lasail	12	53.83	18.72	0.277	0.129	6.44	18.57	0.155	1.95	0.18	100.25	83.71	0.0074
TB2-39A	56.3642	24.6884	Lasail	13	53.66	19.4	0.294	0.143	6.21	18.15	0.153	1.8	0.165	99.98	83.9	0.0079
TB2-39A	56.3642	24.6884	Lasail	14	51.68	21.69	0.525	0.187	5.63	16.55	0.249	3.93	0.159	100.6	83.97	0.0137
TB2-39A	56.3642	24.6884	Lasail	15	54.13	19.16	0.3	0.134	6.17	18.4	0.169	1.88	0.173	100.52	84.17	0.008
TB2-39A	56.3642	24.6884	Lasail	16	52.93	19.61	0.3	0.097	6.14	18.37	0.106	1.93	0.183	99.67	84.21	0.008
TB2-39A	56.3642	24.6884	Lasail	17	54.02	19.36	0.258	0.112	6.04	18.21	0.17	1.79	0.175	100.14	84.31	0.0069
TB2-39A	56.3642	24.6884	Lasail	18	52.66	21.11	0.418	0.153	5.51	16.72	0.315	3.28	0.141	100.31	84.4	0.011
TB2-39A	56.3642	24.6884	Lasail	19	52.46	21.03	0.401	0.182	5.44	16.81	0.34	3.37	0.165	100.2	84.63	0.0106
TB2-39A	56.3642	24.6884	Lasail	20	53.94	19.82	0.254	0.093	5.71	18.08	0.205	1.88	0.171	100.15	84.95	0.0068
TB2-39A	56.3642	24.6884	Lasail	21	53.72	20.1	0.275	0.158	5.61	18.04	0.213	1.74	0.146	100	85.15	0.0074
TB2-39A	56.3642	24.6884	Lasail	22	53.36	20.88	0.273	0.215	5.17	18.09	0.368	2.13	0.173	100.66	86.18	0.0072
TB3-08B	56.3586	24.7346	Lasail	1	49.87	20.31	0.786	0.179	6.2	15.96	0.125	6.15	0.16	99.74	82.11	0.0203
TB3-08B	56.3586	24.7346	Lasail	2	49.84	21.46	0.673	0.193	5.85	15.44	0.059	6.26	0.131	99.91	82.47	0.0173
TB3-08B	56.3586	24.7346	Lasail	3	50.31	20.43	0.77	0.187	6	16.13	0.147	6.2	0.136	100.31	82.73	0.0197
TB3-08B	56.3586	24.7346	Lasail	4	50.32	20.64	0.731	0.161	5.81	16.17	0.127	6.23	0.151	100.34	83.22	0.0187
TB3-08B	56.3586	24.7346	Lasail	5	50.2	21.28	0.624	0.206	5.57	15.8	0.109	6.04	0.148	99.98	83.49	0.016
TB3-08B	56.3586	24.7346	Lasail	6	50.04	20.96	0.679	0.198	5.64	16.05	0.088	6.2	0.141	100	83.53	0.0174
TB3-08B	56.3586	24.7346	Lasail	7	49.8	21.15	0.736	0.153	5.52	15.71	0.139	6.24	0.133	99.58	83.53	0.019
TB3-08B	56.3586	24.7346	Lasail	8	51.09	20.16	0.579	0.161	5.73	17.02	0.194	5.33	0.151	100.42	84.11	0.0149
TB3-08B	56.3586	24.7346	Lasail	9	50.34	20.92	0.669	0.197	5.45	16.23	0.094	6.12	0.144	100.16	84.15	0.0171
TB3-08B	56.3586	24.7346	Lasail	10	52.38	18.79	0.38	0.095	6.1	18.68	0.063	3.67	0.203	100.36	84.52	0.0099
TB3-08B	56.3586	24.7346	Lasail	11	50.92	20.58	0.573	0.166	5.28	16.89	0.385	4.91	0.141	99.85	85.08	0.0149
TB3-08B	56.3586	24.7346	Lasail	12	52.72	18.65	0.327	0.092	5.88	18.83	0.087	3.46	0.178	100.22	85.09	0.0086
TB3-08B	56.3586	24.7346	Lasail	13	51.31	21.31	0.498	0.157	5.12	16.63	0.492	4.56	0.147	100.22	85.27	0.0129
TB3-08B	56.3586	24.7346	Lasail	14	53.34	18.59	0.283	0.118	5.6	19.47	0.092	2.75	0.17	100.41	86.11	0.0074
TB3-08B	56.3586	24.7346	Lasail	15	54.2	17.56	0.171	0.081	5.53	20.53	0.249	1.64	0.202	100.16	86.87	0.0046
TB3-15L	56.5365	24.0412	Lasail	1	50.68	20.55	0.733	0.218	5.2	16.39	0.429	5.35	0.129	99.68	84.89	0.019
TB3-15L	56.5365	24.0412	Lasail	2	51.17	20.41	0.67	0.233	5.24	16.73	0.46	4.78	0.125	99.82	85.05	0.0174
TB3-15L	56.5365	24.0412	Lasail	3	51.48	20.77	0.521	0.226	5.06	16.55	0.327	4.94	0.113	99.99	85.36	0.0135
TB3-15L	56.5365	24.0412	Lasail	4	51.14	20.95	0.583	0.186	4.95	16.46	0.361	4.8	0.11	99.54	85.56	0.0152
TB3-15L	56.5365	24.0412	Lasail	5	51.85	20.7	0.453	0.225	5.13	17.26	0.383	4.35	0.109	100.46	85.71	0.0117
TB3-15L	56.5365	24.0412	Lasail	6	52.23	21.38	0.452	0.216	4.94	17.07	0.367	4.23	0.118	101	86.03	0.0117
TB3-15L	56.5365	24.0412	Lasail	7	52.72	21.54	0.328	0.199	4.86	17.44	0.227	2.39	0.126	99.83	86.48	0.0087
TB3-15L	56.5365	24.0412	Lasail	8	53.08	21.84	0.345	0.213	4.76	17.39	0.19	2.47	0.117	100.41	86.69	0.0091
TB3-15L	56.5365	24.0412	Lasail	9	53.97	19.21	0.267	0.122	5.23	19.35	0.169	1.8	0.135	100.25	86.83	0.0071
TB3-15L	56.5365	24.0412	Lasail	10	53.35	21.67	0.295	0.203	4.72	17.55	0.175	2.2	0.118	100.28	86.89	0.0078
TB3-15L	56.5365	24.0412	Lasail	11	51.63	21.08	0.485	0.223	4.5	16.89	0.806	4.43	0.129	100.17	87	0.0125
TB3-15L	56.5365	24.0412	Lasail	12	53.36	21.95	0.31	0.225	4.63	17.4	0.167	2.22	0.132	100.39	87.01	0.0082
TB3-15L	56.5365	24.0412	Lasail	13	52.71	21.6	0.302	0.176	4.66	17.61	0.318	2.69	0.126	100.19	87.07	0.008
TB3-15L	56.5365	24.0412	Lasail	14	53.36	19.7	0.279	0.153	5.04	19.22	0.276	1.83	0.148	100.01	87.18	0.0074
TB3-15L	56.5365	24.0412	Lasail	15	53.22	21.56	0.307	0.184	4.59	17.52	0.299	2.71	0.119	100.51	87.19	0.0081
TB3-15L	56.5365	24.0412	Lasail	16	53.06	21.62	0.276	0.216	4.47	17.56	0.264	2.52	0.104	100.09	87.5	0.0073
TB3-15L	56.5365	24.0412	Lasail	17	51.99	20.99	0.37	0.199	4.31	17.17	1.033	3.8	0.124	99.99	87.66	0.0096
TB3-15L	56.5365	24.0412	Lasail	18	53.83	21.73	0.272	0.223	4.46	17.87	0.249	2.05	0.11	100.79	87.72	0.0072
TB3-15L	56.5365	24.0412	Lasail	19	54.02	20.09	0.231	0.174	4.73	19.02	0.462	1.91	0.12	100.76	87.76	0.0061
TB3-15L	56.5365	24.0412	Lasail	20	53.33	20.42	0.25	0.135	4.51	18.52	0.399	1.97	0.133	99.67	87.98	0.0067
TB3-15L	56.5365	24.0412	Lasail	21	53.16	20.99	0.235	0.157	4.4	18.23	0.452	2.16	0.114	99.9	88.07	0.0062
TB3-15L	56.5365	24.0412	Lasail	22	51.4	21.06	0.268	0.215	4.68	19.79	0.22	2.2	0.11	99.94	88.29	0.0071
TB3-17L	56.8891	23.8289	Lasail	1	48.1	20.67	0.944	0.18	7.53	13.72	0.119	7.87	0.152	99.29	76.46	0.0242
TB3-17L	56.8891	23.8289	Lasail	2	48.25	21.31	0.86	0.177	6.75	13.94	0.112	8.16	0.143	99.7	78.64	0.0219
TB3-17L	56.8891	23.8289	Lasail	3	48.99	21.5	0.844	0.229	6.2	14.52	0.182	7.1	0.113	99.68	80.67	0.0216
TB3-17L	56.8891	23.8289	Lasail	4	48.83	21.28	0.736	0.196	6.15	14.58	0.101	7.53	0.128	99.53	80.86	0.0188
TB3-17L	56.8891	23.8289	Lasail	5	48.79	21.61	0.657	0.193	6.04	14.53	0.089	7.31	0.123	99.34	81.09	0.0168
TB3-17L	56.8891	23.8289	Lasail	6	49.8	20.78	0.689	0.165	5.98	15.43	0.245	5.97	0.126	99.19	82.14	0.0179
TB3-17L	56.8891	23.8289	Lasail	7	50.06	19.02	0.578	0.134	6.38	16.86	0.207	6.05	0.148	99.44	82.49	0.0149
TB3-17L	56.8891	23.8289	Lasail	8	49.61	21.46	0.685	0.184	5.71	15.34	0.149	6.22	0.114	99.47	82.72	0.0177
TB3-17L	56.8891	23.8289	Lasail	9	49.78	21.44	0.719	0.151	5.4	15.31	0.173	6.26	0.098	99.33	83.48	0.0186
TB3-17L	56.8891	23.8289	Lasail	10	49.93	21.17	0.73	0.161	5.51	15.81	0.186	6.08	0.127	99.7	83.65	0.0188
TB3-17L	56.8891	23.8289	Lasail	11	50.65	19.69	0.534	0.143	5.62	16.94	0.285	5.31	0.141	99.31	84.31	0.0139
TB3-17L	56.8891	23.8289	Lasail	12	50.76	20.45	0.524	0.123	5.46	16.76	0.253	5.01	0.12	99.46	84.55	0.0137
TB3-17L	56.8891	23.8289	Lasail	13	50.86	19.48	0.482	0.178	5.59	17.22	0.221	5.29	0.144	99.47	84.59	0.0125
TB3-17L	56.8891	23.8289	Lasail	14	52.03	19.28	0.351	0.158	5.21	18.07	0.735	3.49	0.146	99.47	86.08	0.0092
TB3-17L	56.8891	23.8289	Lasail	15	51.81	20.17	0.317	0.181	4.93	17.63	0.922	3.72	0.125	99.81	86.44	0.0083
TB3-17L	56.8891	23.8289	Lasail	16	51.84	20.77	0.313	0.178	4.84	17.32	0.806	3.51	0.134	99.71	86.45	0.0082
TB3-17L	56.8891	23.8289	Lasail	17	52.24	19.78	0.298	0.135	4.98	18.02	1.089	3.29	0.167	100	86.58	0.0078
TB3-17L	56.8891	23.8289	Lasail	18	52.11	20.55	0.292	0.187	4.74	17.82	0.83	3.37	0.137	100.04	87.01	0.0076
TB3-17L	56.8891	23.8289	Lasail	19	52.53	19.46	0.22	0.155	4.81	18.79	0.864	2.81	0.175	99.81	87.44	0.0058
TB3-17L	56.8891	23.8289	Lasail	20	52.3	20.42	0.292	0.15	4.44	17.79	1.118	3.15	0.143	99.8	87.72	0.0077
TB3-17L	56.8891	23.8289	Lasail	21	53.69	18.01	0.156	0.075	5.08	20.56	0.53	1.29	0.16	99.55	87.83	0.0042
TB3-19B	56.4551	24.554	Lasail	1	51.55	20.58	0.575	0.2	6.14	17.07	0.1	3.54	0.151	99.91	83.21	0.0152
TB3-19B	56.4551	24.554	Lasail	2	52.06	21.1	0.499	0.213	5.8	17.11	0.105	3.1	0.147	100.13	84.02	0.0132
TB3-19B	56.4551	24.554	Lasail	3	52.24	22.04	0.395	0.195	5	17.28	0.182	2.53	0.117	99.98	86.03	0.0105
TB3-19B	56.4551	24.554	Lasail	4	52.82	21.95	0.375	0.192	4.87	16.85	0.21	2.65	0.117	100.03	86.05	0.01
TB3-19B	56.4551	24.554	Lasail	5	53.21	21.78	0.353	0.185	4.99	17.36	0.158	2.15	0.116	100.3	86.11	0.0094
TB3-19B	56.4551	24.554	Lasail	6	52.81	21.86	0.353	0.236	4.89	17.2	0.214	2.55	0.117	100.23	86.24	0.0093
TB3-19B	56.4551	24.554	Lasail	7	52.95	21.93	0.344	0.215	4.89	17.21	0.143	2.21	0.113	100.01	86.25	0.0092
TB3-19B	56.4551	24.554	Lasail	8	52.97	22.11	0.354	0.222	4.93	17.4	0.154	2.23	0.116	100.49	86.28	0.0094
TB3-19B	56.4551	24.554	Lasail	9	52.86	21.98	0.351	0.173	4.93	17.49	0.161	2.03	0.137	100.11	86.35	0.0094
TB3-19B	56.4551	24.554	Lasail	10	52.96	21.95	0.348	0.168	4.83	17.26	0.129	2.21	0.104	99.96	86.43	0.0093
TB3-19B	56.4551	24.554	Lasail	11	53.02	21.86	0.346	0.199	4.87	17.51	0.155	2.19	0.128	100.28	86.5	0.0092
TB3-19B	56.4551	24.554	Lasail	12	53.17	21.96	0.347	0.211	4.87	17.56	0.14	2.1	0.125	100.48	86.54	0.0092
TB3-19B	56.4551	24.554	Lasail	13	53.01	22.02	0.327	0.202	4.87	17.56	0.136	2.1	0.105	100.33	86.54	0.0087
TB3-19B	56.4551	24.554	Lasail	14	53.11	21.97	0.344	0.189	4.82	17.55	0.136	2.13	0.125	100.37	86.65	0.0091
TB3-19B	56.4551	24.554	Lasail	15	52.95	22.15	0.349	0.178	4.69	17.09	0.172	2.16	0.115	99.85	86.66	0.0093
TB3-19B	56.4551	24.554	Lasail	16	53.12	22.26	0.328	0.205	4.6	17.48	0.183	2.27	0.097	100.54	87.14	0.0087
YV15-08	56.341	24.7814	Lasail	1	52.1	20.29	0.967	0.223	6.49	15.55	0.06	5.37	N.M.	101.05	81.03	0.0249
YV15-08	56.341	24.7814	Lasail	2	52.23	20.09	0.896	0.198	6.65	16.1	0.158	4.92	N.M.	101.24	81.19	0.0231
YV15-08	56.341	24.7814	Lasail	3	53.07	20.36	0.663	0.24	6.59	16.11	0.082	4.27	N.M.	101.39	81.33	0.0172
YV15-08	56.341	24.7814	Lasail	4	52.78	21.23	0.238	0.075	6.75	16.56	0.078	1.16	N.M.	98.87	81.39	0.0065
YV15-08	56.341	24.7814	Lasail	5	52.89	20.19	0.684	0.15	6.51	16.04	0.097	4.62	N.M.	101.18	81.45	0.0177
YV15-08	56.341	24.7814	Lasail	6	52.9	21	0.724	0.185	6.27	15.8	0.096	4.16	N.M.	101.14	81.79	0.0189
YV15-08	56.341	24.7814	Lasail	7	53.2	20.01	0.585	0.228	6.44	16.54	0.135	4.08	N.M.	101.22	82.07	0.0152
YV15-08	56.341	24.7814	Lasail	8	53.18	19.87	0.719	0.255	6.4	16.44	0.074	4.27	N.M.	101.21	82.07	0.0186
YV15-08	56.341	24.7814	Lasail	9	54.44	16.59	0.356	0.138	7.13	18.32	0.037	2.02	N.M.	99.03	82.08	0.0096
YV15-08	56.341	24.7814	Lasail	10	53.52	19.85	0.599	0.2	6.38	16.48	0.136	4.14	N.M.	101.31	82.16	0.0155
YV15-08	56.341	24.7814	Lasail	11	52.47	20.84	0.681	0.264	6.01	15.62	0.074	3.92	N.M.	99.88	82.25	0.018
YV15-08	56.341	24.7814	Lasail	12	53.26	20.44	0.51	0.193	6.29	16.4	0.091	4.25	N.M.	101.43	82.29	0.0132
YV15-08	56.341	24.7814	Lasail	13	53.74	20.12	0.549	0.159	6.42	16.74	0.13	3.6	N.M.	101.46	82.29	0.0143
YV15-08	56.341	24.7814	Lasail	14	53.08	21.17	0.694	0.171	6.05	15.95	0.122	4.09	N.M.	101.33	82.45	0.018
YV15-08	56.341	24.7814	Lasail	15	52.68	18.59	0.79	0.19	6.47	17.27	0.2	4.84	N.M.	101.03	82.63	0.0203
YV15-08	56.341	24.7814	Lasail	16	52.6	20.06	0.696	0.23	6.2	16.56	0.23	4.92	N.M.	101.5	82.64	0.0178
YV15-08	56.341	24.7814	Lasail	17	53.05	19.04	0.763	0.193	6.38	17.07	0.111	4.67	N.M.	101.28	82.67	0.0197
YV15-08	56.341	24.7814	Lasail	18	53.64	20.22	0.439	0.196	6.17	16.65	0.115	3.71	N.M.	101.14	82.79	0.0114
YV15-08	56.341	24.7814	Lasail	19	55.2	18.05	0.388	0.095	6.55	18.2	0.059	2.25	N.M.	100.79	83.2	0.0103
YV15-08	56.341	24.7814	Lasail	20	53.73	21.4	0.541	0.186	5.84	16.3	0.098	3.31	N.M.	101.41	83.26	0.0142
YV15-08	56.341	24.7814	Lasail	21	54.97	14.71	0.257	0.092	7.3	20.46	0.083	1.93	N.M.	99.8	83.32	0.0069
YV15-08	56.341	24.7814	Lasail	22	55.48	17.96	0.382	0.1	6.61	18.76	0.059	1.9	N.M.	101.25	83.5	0.0101
YV15-08	56.341	24.7814	Lasail	23	55.79	17.31	0.247	0.13	6.75	19.34	0.1	1.73	N.M.	101.4	83.63	0.0065
YV15-08	56.341	24.7814	Lasail	24	54.3	19.64	0.555	0.175	5.92	16.99	0.093	3.26	N.M.	100.93	83.65	0.0146
YV15-08	56.341	24.7814	Lasail	25	55.89	16.77	0.292	0.077	6.68	19.3	0.07	1.7	N.M.	100.78	83.74	0.0078
YV15-08	56.341	24.7814	Lasail	26	55.13	17.68	0.317	0.113	6.51	18.82	0.07	2.07	N.M.	100.71	83.75	0.0084
YV15-08	56.341	24.7814	Lasail	27	53.34	20.87	0.495	0.164	5.66	16.56	0.133	3.72	N.M.	100.94	83.91	0.0129
YV15-08	56.341	24.7814	Lasail	28	54.05	21.18	0.488	0.133	5.7	16.68	0.09	3.1	N.M.	101.42	83.91	0.0128
YV15-08	56.341	24.7814	Lasail	29	55.55	18.78	0.33	0.08	6.23	18.48	0.065	1.79	N.M.	101.31	84.09	0.0088
YV15-08	56.341	24.7814	Lasail	30	55.45	18.06	0.332	0.093	6.4	19.06	0.071	1.8	N.M.	101.27	84.15	0.0088
YV15-08	56.341	24.7814	Lasail	31	55.76	18.94	0.313	0.08	5.99	18.29	0.061	1.66	N.M.	101.09	84.48	0.0083
YV15-08	56.341	24.7814	Lasail	32	54.89	20.11	0.36	0.163	5.61	17.4	0.082	2.71	N.M.	101.33	84.68	0.0094
YV15-08	56.341	24.7814	Lasail	33	55.94	19.67	0.272	0.119	5.59	18.2	0.088	1.57	N.M.	101.45	85.3	0.0072
YV15-26	56.3735	24.5106	Lasail	1	53.58	20.36	0.309	0.145	5.3	17.11	0.307	3.64	N.M.	100.75	85.19	0.0081
YV15-26	56.3735	24.5106	Lasail	2	55.89	18.51	0.152	0.208	5.76	18.89	0.262	1.51	N.M.	101.18	85.39	0.004
YV15-26	56.3735	24.5106	Lasail	3	53.93	19.87	0.273	0.118	5.31	17.52	0.345	3.93	N.M.	101.3	85.47	0.0071
YV15-26	56.3735	24.5106	Lasail	4	53.76	19.62	0.372	0.217	5.25	17.35	0.413	3.71	N.M.	100.69	85.49	0.0097
YV15-26	56.3735	24.5106	Lasail	5	56.21	18.56	0.145	0.129	5.55	18.57	0.386	1.44	N.M.	100.99	85.64	0.0039
YV15-26	56.3735	24.5106	Lasail	6	55.89	19.06	0.138	0.149	5.44	18.38	0.37	1.42	N.M.	100.85	85.76	0.0037
YV15-26	56.3735	24.5106	Lasail	7	53.01	20.43	0.371	0.123	4.92	16.69	0.569	3.44	N.M.	99.55	85.81	0.0098
YV15-26	56.3735	24.5106	Lasail	8	53.99	20.24	0.242	0.109	5.05	17.6	0.566	3.54	N.M.	101.34	86.13	0.0063
YV15-26	56.3735	24.5106	Lasail	9	54.01	20	0.235	0.122	5.05	17.68	0.711	3.5	N.M.	101.31	86.19	0.0061
YV15-26	56.3735	24.5106	Lasail	10	53.69	20.29	0.366	0.309	4.89	17.31	0.679	3.84	N.M.	101.37	86.32	0.0094
YV15-26	56.3735	24.5106	Lasail	11	53.86	20.32	0.341	0.269	4.9	17.43	0.513	3.57	N.M.	101.2	86.38	0.0088
YV15-26	56.3735	24.5106	Lasail	12	54.5	20.26	0.202	0.106	4.88	17.42	0.657	2.62	N.M.	100.65	86.42	0.0053
YV15-26	56.3735	24.5106	Lasail	13	54.44	18.96	0.27	0.098	5.08	18.15	0.725	3.34	N.M.	101.06	86.43	0.007
YV15-26	56.3735	24.5106	Lasail	14	54.38	20.86	0.23	0.272	4.78	17.08	0.475	2.77	N.M.	100.85	86.43	0.006
YV15-26	56.3735	24.5106	Lasail	15	54.28	19.98	0.273	0.449	4.94	17.78	0.354	3.22	N.M.	101.28	86.51	0.007
YV15-26	56.3735	24.5106	Lasail	16	54.43	20.3	0.277	0.223	4.88	17.74	0.46	3.14	N.M.	101.45	86.63	0.0072
YV15-26	56.3735	24.5106	Lasail	17	55.24	18.87	0.167	0.108	5.08	18.47	0.47	1.75	N.M.	100.16	86.63	0.0044
YV15-26	56.3735	24.5106	Lasail	18	54.16	20.34	0.303	0.201	4.83	17.6	0.677	3.18	N.M.	101.29	86.66	0.0079
YV15-26	56.3735	24.5106	Lasail	19	54.11	20.13	0.311	0.213	4.81	17.56	0.719	3.26	N.M.	101.11	86.68	0.0081
YV15-26	56.3735	24.5106	Lasail	20	54.36	20.69	0.272	0.129	4.7	17.22	0.661	3.01	N.M.	101.04	86.72	0.0071
YV15-26	56.3735	24.5106	Lasail	21	54.34	20.48	0.261	0.188	4.76	17.49	0.57	2.79	N.M.	100.88	86.75	0.0068
YV15-26	56.3735	24.5106	Lasail	22	55.9	20.11	0.173	0.122	4.94	18.35	0.265	1.33	N.M.	101.19	86.88	0.0046
YV15-26	56.3735	24.5106	Lasail	23	54.8	19	0.19	0.145	5.06	18.83	0.617	2.57	N.M.	101.21	86.9	0.005
YV15-26	56.3735	24.5106	Lasail	24	56.16	18.08	0.132	0.093	5.22	19.44	0.382	1.43	N.M.	100.94	86.91	0.0035
YV15-26	56.3735	24.5106	Lasail	25	54.75	20.25	0.229	0.168	4.62	17.77	0.723	2.71	N.M.	101.22	87.27	0.006
YV15-26	56.3735	24.5106	Lasail	26	55.71	19.45	0.15	0.179	4.73	18.91	0.456	1.74	N.M.	101.33	87.69	0.0039
YV15-26	56.3735	24.5106	Lasail	27	54.61	20.95	0.165	0.226	4.3	17.4	0.796	2.3	N.M.	100.75	87.82	0.0044
YV15-26	56.3735	24.5106	Lasail	28	56.11	18.92	0.141	0.115	4.78	19.48	0.426	1.43	N.M.	101.4	87.9	0.0037
YV15-26	56.3735	24.5106	Lasail	29	54.85	21.38	0.189	0.246	4.21	17.32	0.838	2.45	N.M.	101.48	88	0.0049
YV15-26	56.3735	24.5106	Lasail	30	55.03	20.63	0.207	0.109	4.29	17.96	0.774	2.34	N.M.	101.34	88.18	0.0054
YV15-26	56.3735	24.5106	Lasail	31	55.02	20.78	0.191	0.233	4.2	17.68	0.776	2.31	N.M.	101.19	88.24	0.005
YV15-26	56.3735	24.5106	Lasail	32	54.78	20.59	0.19	0.221	4.25	17.93	0.905	2.51	N.M.	101.38	88.26	0.0049
YV15-26	56.3735	24.5106	Lasail	33	55.52	21.11	0.127	0.139	4.19	17.71	0.622	1.82	N.M.	101.24	88.28	0.0033
YV15-26	56.3735	24.5106	Lasail	34	54.93	20.63	0.163	0.228	4.23	17.89	0.754	2.24	N.M.	101.07	88.29	0.0043
YV15-26	56.3735	24.5106	Lasail	35	55.82	20.29	0.132	0.148	4.29	18.63	0.488	1.62	N.M.	101.42	88.56	0.0035
YV15-26	56.3735	24.5106	Lasail	36	54.81	21.11	0.189	0.111	4.02	17.73	0.804	2.22	N.M.	100.99	88.72	0.005
AB16-4611	56.4353	24.6081	Tholeiitic Alley	1	52.81	20.59	0.251	0.237	8.83	15.31	0.041	2.46	0.228	100.76	75.55	0.0067
AB16-4611	56.4353	24.6081	Tholeiitic Alley	2	52.98	20.65	0.273	0.118	8.76	15.51	0.051	2.3	0.192	100.83	75.94	0.0074
AB16-4611	56.4353	24.6081	Tholeiitic Alley	3	52.91	20.58	0.259	0.119	8.59	15.37	0.058	2.29	0.218	100.39	76.13	0.007
AB16-4611	56.4353	24.6081	Tholeiitic Alley	4	53.25	20.9	0.232	0.127	8.57	15.44	0.048	2.2	0.208	100.98	76.25	0.0062
AB16-4611	56.4353	24.6081	Tholeiitic Alley	5	53.28	20.88	0.221	0.136	8.39	15.3	0.041	2.34	0.198	100.79	76.47	0.006
AB16-4611	56.4353	24.6081	Tholeiitic Alley	6	53.41	20.96	0.251	0.187	8.34	15.33	0.039	2.13	0.189	100.84	76.62	0.0067
AB16-4611	56.4353	24.6081	Tholeiitic Alley	7	53.05	21.19	0.25	0.196	8.28	15.4	0.034	2.17	0.21	100.78	76.83	0.0067
AB16-4611	56.4353	24.6081	Tholeiitic Alley	8	53.65	20.49	0.193	0.076	8.48	15.86	0.049	1.46	0.218	100.48	76.92	0.0053
AB16-4611	56.4353	24.6081	Tholeiitic Alley	9	53.7	20.3	0.194	0.141	8.46	15.86	0.012	1.57	0.225	100.46	76.97	0.0053
AB16-4611	56.4353	24.6081	Tholeiitic Alley	10	53.37	20.62	0.196	0.166	8.24	16.22	0.009	1.56	0.219	100.6	77.82	0.0053
TB2-33B	56.4502	24.2521	Tholeiitic Alley	1	52.97	19.2	0.268	0.035	9.55	16.17	0.021	1.02	0.248	99.48	75.11	0.0074
TB2-33B	56.4502	24.2521	Tholeiitic Alley	2	53.08	19.22	0.247	0.177	9.4	16.54	0.041	1.02	0.241	99.97	75.82	0.0068
TB2-33B	56.4502	24.2521	Tholeiitic Alley	3	53.94	19.5	0.244	0.152	9.21	16.4	0.018	0.9	0.229	100.59	76.04	0.0067
TB2-33B	56.4502	24.2521	Tholeiitic Alley	4	53.54	16.45	0.205	0.138	10.04	17.98	0.066	0.9	0.297	99.62	76.15	0.0056
TB2-33B	56.4502	24.2521	Tholeiitic Alley	5	53.52	15.27	0.176	0.07	10.39	18.95	0.069	0.88	0.302	99.63	76.48	0.0048
TB2-33B	56.4502	24.2521	Tholeiitic Alley	6	52.74	19.01	0.216	0.177	9.09	16.8	0.049	0.89	0.24	99.21	76.71	0.006
TB2-33B	56.4502	24.2521	Tholeiitic Alley	7	53.36	15.09	0.185	0.135	10.3	19.18	0.069	0.87	0.29	99.48	76.85	0.0051
TB2-33B	56.4502	24.2521	Tholeiitic Alley	8	51.78	20.82	0.368	0.146	8.43	15.84	0.071	1.47	0.205	99.13	77.01	0.0101
TB2-33B	56.4502	24.2521	Tholeiitic Alley	9	53.71	17.27	0.186	0.151	9.34	17.73	0.046	0.88	0.282	99.6	77.19	0.0051
TB2-33B	56.4502	24.2521	Tholeiitic Alley	10	52.88	19.37	0.285	0.174	8.66	16.54	0.087	1.26	0.245	99.5	77.3	0.0078
TB2-33B	56.4502	24.2521	Tholeiitic Alley	11	53.65	19.23	0.222	0.184	8.67	16.96	0.091	1.1	0.231	100.34	77.71	0.006
TB2-33B	56.4502	24.2521	Tholeiitic Alley	12	53.88	18.91	0.24	0.196	8.75	17.13	0.061	1.03	0.232	100.43	77.73	0.0065
TB2-33B	56.4502	24.2521	Tholeiitic Alley	13	53.42	18.61	0.213	0.161	8.76	17.18	0.063	0.85	0.226	99.48	77.76	0.0059
TB2-33B	56.4502	24.2521	Tholeiitic Alley	14	54.3	17.43	0.192	0.081	9.26	18.23	0.096	0.89	0.284	100.76	77.82	0.0052
TB2-33B	56.4502	24.2521	Tholeiitic Alley	15	52.88	20.31	0.246	0.116	8.12	16.34	0.134	1.29	0.19	99.63	78.2	0.0067
TB2-33B	56.4502	24.2521	Tholeiitic Alley	16	53.28	20.38	0.251	0.038	8.01	16.12	0.097	1.15	0.228	99.55	78.2	0.0069
TB2-33B	56.4502	24.2521	Tholeiitic Alley	17	53.19	20.32	0.227	0.121	8.03	16.42	0.094	1.15	0.219	99.77	78.47	0.0062
TB2-33B	56.4502	24.2521	Tholeiitic Alley	18	53.75	20.14	0.239	0.111	7.92	16.37	0.101	1.08	0.203	99.91	78.65	0.0065
TB2-33B	56.4502	24.2521	Tholeiitic Alley	19	53.93	19.09	0.174	0.16	8.22	17.01	0.081	0.88	0.212	99.76	78.67	0.0048
TB2-33B	56.4502	24.2521	Tholeiitic Alley	20	53.36	19.77	0.226	0.146	8.17	16.93	0.086	1.05	0.243	99.98	78.69	0.0062
TB2-33B	56.4502	24.2521	Tholeiitic Alley	21	53.01	20.01	0.215	0.196	7.95	16.65	0.077	0.98	0.216	99.3	78.87	0.0059
TB2-33B	56.4502	24.2521	Tholeiitic Alley	22	53.79	19.05	0.185	0.118	8.24	17.29	0.084	0.88	0.232	99.87	78.9	0.0051
TB2-33B	56.4502	24.2521	Tholeiitic Alley	23	52.73	20.18	0.218	0.119	7.89	16.68	0.072	1	0.216	99.11	79.03	0.006
TB2-33B	56.4502	24.2521	Tholeiitic Alley	24	53.39	20.28	0.221	0.142	7.7	16.51	0.07	0.96	0.203	99.48	79.26	0.0061
TB2-33B	56.4502	24.2521	Tholeiitic Alley	25	52.63	21.15	0.234	0.178	7.51	16.18	0.096	1.13	0.188	99.3	79.34	0.0064
TB2-33B	56.4502	24.2521	Tholeiitic Alley	26	53.73	19.4	0.173	0.028	7.8	17.13	0.094	0.82	0.225	99.4	79.65	0.0048
TB2-33B	56.4502	24.2521	Tholeiitic Alley	27	52.8	21.02	0.215	0.148	7.41	16.28	0.083	1.04	0.199	99.2	79.66	0.0059
TB2-33B	56.4502	24.2521	Tholeiitic Alley	28	53.92	20.58	0.197	0.063	7.51	16.53	0.093	0.89	0.209	99.99	79.69	0.0054
TB2-33B	56.4502	24.2521	Tholeiitic Alley	29	53.61	19.48	0.184	0.13	7.75	17.07	0.104	0.88	0.216	99.42	79.7	0.0051
TB2-33B	56.4502	24.2521	Tholeiitic Alley	30	53.68	19.98	0.162	0.11	7.65	16.86	0.091	0.82	0.201	99.55	79.71	0.0045
TB2-33B	56.4502	24.2521	Tholeiitic Alley	31	53.1	21.51	0.224	0.167	7.27	16.1	0.1	0.99	0.187	99.65	79.79	0.0061
TB2-33B	56.4502	24.2521	Tholeiitic Alley	32	53.94	19.51	0.157	0.145	7.67	17.08	0.076	0.88	0.208	99.67	79.88	0.0043
TB2-33B	56.4502	24.2521	Tholeiitic Alley	33	53.87	20.03	0.164	0.119	7.57	16.94	0.119	0.85	0.223	99.89	79.95	0.0045
TB2-33B	56.4502	24.2521	Tholeiitic Alley	34	53.62	20.53	0.179	0.15	7.51	16.85	0.093	0.94	0.194	100.07	80	0.0049
TB2-33B	56.4502	24.2521	Tholeiitic Alley	35	53.72	20.67	0.182	0.077	7.46	16.78	0.085	0.93	0.213	100.12	80.04	0.005
TB2-33B	56.4502	24.2521	Tholeiitic Alley	36	53.78	20	0.168	0.076	7.56	17.03	0.09	0.83	0.189	99.72	80.06	0.0046
TB2-33B	56.4502	24.2521	Tholeiitic Alley	37	54	20.21	0.173	0.1	7.36	17.01	0.12	0.85	0.207	100.03	80.47	0.0047
TB2-34D	56.4635	24.3189	Tholeiitic Alley	1	51.71	16.85	0.391	0.233	15.26	14.34	0.017	0.61	0.404	99.82	62.62	0.011
TB2-34D	56.4635	24.3189	Tholeiitic Alley	2	51.06	18.16	0.473	0.227	13.77	14.4	0.021	0.96	0.329	99.4	65.08	0.0133
TB2-34D	56.4635	24.3189	Tholeiitic Alley	3	51.22	19.15	0.545	0.181	13.32	14.06	0.009	1.06	0.31	99.86	65.3	0.0152
TB2-34D	56.4635	24.3189	Tholeiitic Alley	4	51.63	17.5	0.467	0.237	13.87	14.87	0.034	0.94	0.347	99.9	65.65	0.013
TB2-34D	56.4635	24.3189	Tholeiitic Alley	5	51.37	18.38	0.439	0.252	12.95	14.6	0.036	0.86	0.328	99.22	66.77	0.0123
TB2-34D	56.4635	24.3189	Tholeiitic Alley	6	51.52	18.47	0.435	0.206	12.8	14.82	0.022	0.78	0.29	99.34	67.36	0.0122
TB2-34D	56.4635	24.3189	Tholeiitic Alley	7	51.61	19.08	0.382	0.17	12.32	14.7	0.008	0.82	0.298	99.39	68.02	0.0107
TB2-34D	56.4635	24.3189	Tholeiitic Alley	8	52.2	18.36	0.35	0.144	12.69	15.32	0.037	0.62	0.333	100.05	68.27	0.0098
TB2-34D	56.4635	24.3189	Tholeiitic Alley	9	52.2	18.69	0.365	0.147	12.21	15.35	0.028	0.65	0.286	99.93	69.14	0.0101
TB2-34D	56.4635	24.3189	Tholeiitic Alley	10	51.57	18.86	0.353	0.199	11.04	15.65	0.073	0.98	0.285	99.01	71.65	0.0098
TB2-34D	56.4635	24.3189	Tholeiitic Alley	11	52.19	19.41	0.299	0.163	10.48	15.59	0.042	0.86	0.256	99.29	72.61	0.0083
TB2-34D	56.4635	24.3189	Tholeiitic Alley	12	51.9	19.58	0.396	0.146	10.28	15.33	0.09	1.08	0.243	99.05	72.66	0.011
TB2-34D	56.4635	24.3189	Tholeiitic Alley	13	52.28	19.55	0.292	0.167	10.52	15.78	0.049	0.79	0.256	99.68	72.78	0.0081
TB2-34D	56.4635	24.3189	Tholeiitic Alley	14	51.87	19.78	0.349	0.239	10.1	15.42	0.081	1.03	0.239	99.11	73.13	0.0097
TB2-43C	56.4571	24.5582	Tholeiitic Alley	1	52.34	21.17	0.387	0.08	7.6	16.56	0.093	1.2	0.192	99.62	79.52	0.0106
TB2-43C	56.4571	24.5582	Tholeiitic Alley	2	52.84	20.81	0.243	0.286	6.89	16.25	0.298	2.32	0.16	100.1	80.78	0.0065
TB2-43C	56.4571	24.5582	Tholeiitic Alley	3	52.93	20.8	0.257	0.175	7.15	16.95	0.068	1.05	0.188	99.57	80.86	0.007
TB2-43C	56.4571	24.5582	Tholeiitic Alley	4	52.79	21.06	0.238	0.179	7.08	16.86	0.079	1.06	0.166	99.51	80.93	0.0065
TB2-43C	56.4571	24.5582	Tholeiitic Alley	5	52.61	20.92	0.25	0.22	6.49	15.9	0.448	2.46	0.154	99.45	81.37	0.0067
TB2-43C	56.4571	24.5582	Tholeiitic Alley	6	52.6	21.13	0.254	0.19	6.32	16.26	0.505	2.47	0.122	99.85	82.1	0.0068
TB2-43C	56.4571	24.5582	Tholeiitic Alley	7	53.56	20.35	0.13	0.14	6.38	17.15	0.063	1.58	0.157	99.51	82.73	0.0035
TB2-43C	56.4571	24.5582	Tholeiitic Alley	8	53.14	21.13	0.166	0.187	6.09	16.46	0.26	1.94	0.145	99.52	82.81	0.0045
TB2-43C	56.4571	24.5582	Tholeiitic Alley	9	52.57	21.22	0.237	0.142	5.71	16.36	0.568	2.44	0.135	99.38	83.63	0.0064
TB2-43C	56.4571	24.5582	Tholeiitic Alley	10	53.14	20.92	0.151	0.115	6.09	17.59	0.235	1.01	0.169	99.42	83.74	0.0041
TB2-43C	56.4571	24.5582	Tholeiitic Alley	11	52.75	21.65	0.115	0.096	4.59	17	0.768	2.49	0.133	99.59	86.85	0.0031
TB2-43C	56.4571	24.5582	Tholeiitic Alley	12	53.66	21.04	0.092	0.212	4.37	17.51	0.541	2.3	0.113	99.84	87.72	0.0025
TB2-43C	56.4571	24.5582	Tholeiitic Alley	13	53.17	21.64	0.103	0.144	4.25	17.13	0.699	2.47	0.115	99.72	87.78	0.0027
TB2-43C	56.4571	24.5582	Tholeiitic Alley	14	53.63	20.73	0.098	0.085	4.3	18.02	0.425	2.2	0.117	99.61	88.19	0.0026
TB2-43C	56.4571	24.5582	Tholeiitic Alley	15	53.64	21.02	0.085	0.116	4.05	17.95	0.47	2.44	0.12	99.89	88.76	0.0022
TB2-43C	56.4571	24.5582	Tholeiitic Alley	16	53.74	20.52	0.07	0.12	4.01	18.41	0.535	2.27	0.11	99.79	89.11	0.0019
TB2-43C	56.4571	24.5582	Tholeiitic Alley	17	53.94	21.36	0.071	0.168	3.95	18.62	0.636	1.15	0.123	100.02	89.36	0.0019
TB2-43C	56.4571	24.5582	Tholeiitic Alley	18	53.35	21.65	0.066	0.111	3.91	18.52	0.678	1.16	0.138	99.58	89.41	0.0018
TB2-43C	56.4571	24.5582	Tholeiitic Alley	19	53.43	21.18	0.074	0.113	3.58	17.76	1.105	2.25	0.115	99.61	89.84	0.002
TB2-43C	56.4571	24.5582	Tholeiitic Alley	20	53.84	20.43	0.056	0.061	3.69	18.37	1.019	1.99	0.106	99.56	89.87	0.0015
TB2-43C	56.4571	24.5582	Tholeiitic Alley	21	53.72	20.62	0.059	0.131	3.63	18.3	0.915	2.27	0.111	99.76	89.99	0.0016
TB2-44D	56.4664	24.5362	Tholeiitic Alley	1	51.78	18.83	0.323	0.165	14.78	13.32	0.001	1.07	0.38	100.65	61.63	0.009
TB2-44D	56.4664	24.5362	Tholeiitic Alley	2	51.66	18.69	0.321	0.096	13.91	13.95	0.013	1.2	0.342	100.18	64.13	0.009
TB2-44D	56.4664	24.5362	Tholeiitic Alley	3	51.83	19.06	0.402	0.195	13.57	13.9	<0.001	1.56	0.337	100.85	64.61	0.0111
TB2-44D	56.4664	24.5362	Tholeiitic Alley	4	51.87	18.64	0.315	0.171	13.63	14.27	<0.001	1.66	0.333	100.89	65.11	0.0086
TB2-44D	56.4664	24.5362	Tholeiitic Alley	5	51.68	19.17	0.385	0.172	13.31	14.02	0.002	1.89	0.299	100.93	65.25	0.0105
TB2-44D	56.4664	24.5362	Tholeiitic Alley	6	51.42	19.36	0.405	0.221	13.11	13.99	0.004	1.71	0.311	100.53	65.54	0.0111
TB2-44D	56.4664	24.5362	Tholeiitic Alley	7	49.65	19.76	0.386	0.183	13	14	0.006	2.13	0.3	99.42	65.75	0.0107
TB2-44D	56.4664	24.5362	Tholeiitic Alley	8	51.9	18.94	0.331	0.194	13.19	14.23	<0.001	1.61	0.32	100.72	65.79	0.0091
TB2-44D	56.4664	24.5362	Tholeiitic Alley	9	51.91	18.42	0.353	0.142	13.23	14.3	0.01	1.83	0.316	100.51	65.83	0.0097
TB2-44D	56.4664	24.5362	Tholeiitic Alley	10	52.37	18.13	0.311	0.164	13.31	14.45	0.012	1.21	0.339	100.3	65.93	0.0086
TB2-44D	56.4664	24.5362	Tholeiitic Alley	11	51.67	19.13	0.331	0.23	13.12	14.32	<0.001	1.56	0.334	100.7	66.05	0.0091
TB2-44D	56.4664	24.5362	Tholeiitic Alley	12	52.28	18.67	0.31	0.166	13.1	14.51	0.005	1.57	0.309	100.92	66.38	0.0085
TB2-44D	56.4664	24.5362	Tholeiitic Alley	13	51.65	19.29	0.375	0.166	12.78	14.31	0.014	1.62	0.317	100.52	66.62	0.0103
TB2-44D	56.4664	24.5362	Tholeiitic Alley	14	52.33	18.38	0.29	0.292	12.87	14.92	<0.001	1.41	0.317	100.81	67.39	0.0079
TB2-44D	56.4664	24.5362	Tholeiitic Alley	15	52.29	18.17	0.287	0.264	12.92	14.98	0.004	1.48	0.312	100.71	67.39	0.0079
TB2-44D	56.4664	24.5362	Tholeiitic Alley	16	51.59	19.13	0.329	0.299	12.54	14.65	<0.001	1.82	0.295	100.65	67.56	0.009
TB2-44D	56.4664	24.5362	Tholeiitic Alley	17	52.45	18.42	0.298	0.186	12.71	14.89	0.02	1.59	0.302	100.87	67.62	0.0081
TB2-44D	56.4664	24.5362	Tholeiitic Alley	18	51.79	19.64	0.378	0.171	11.22	14.78	0.014	1.93	0.28	100.2	70.13	0.0103
TB2-44D	56.4664	24.5362	Tholeiitic Alley	19	51.91	20.05	0.347	0.15	11.02	14.86	0.009	1.86	0.273	100.48	70.62	0.0095
TB2-44D	56.4664	24.5362	Tholeiitic Alley	20	50.9	19.75	0.632	0.271	10.79	14.64	0.048	2.79	0.241	100.06	70.75	0.0171
TB2-44D	56.4664	24.5362	Tholeiitic Alley	21	51.84	20.04	0.313	0.176	10.22	15.64	0.01	2.32	0.217	100.78	73.17	0.0084
TB2-44D	56.4664	24.5362	Tholeiitic Alley	22	51.59	20.01	0.306	0.209	9.95	15.31	0.019	2.27	0.245	99.91	73.28	0.0083
TB2-44D	56.4664	24.5362	Tholeiitic Alley	23	51.95	19.43	0.279	0.288	9.92	15.56	0.038	2.2	0.223	99.89	73.66	0.0075
TB2-44D	56.4664	24.5362	Tholeiitic Alley	24	52.12	19.96	0.287	0.237	9.88	15.56	0.019	2.27	0.217	100.55	73.73	0.0077
TB2-44D	56.4664	24.5362	Tholeiitic Alley	25	51.92	18.86	0.324	0.329	9.89	15.59	0.013	2.27	0.222	99.42	73.75	0.0088
TB2-44D	56.4664	24.5362	Tholeiitic Alley	26	52.17	20.86	0.437	0.22	9.42	15.13	0.065	2.11	0.21	100.62	74.11	0.0118
TB2-44D	56.4664	24.5362	Tholeiitic Alley	27	51.96	20.94	0.335	0.175	9.31	15.2	0.025	2.52	0.185	100.65	74.43	0.009
TB2-44D	56.4664	24.5362	Tholeiitic Alley	28	52.18	20.86	0.336	0.166	9.32	15.3	0.024	2.51	0.207	100.9	74.53	0.009
TB2-44D	56.4664	24.5362	Tholeiitic Alley	29	52.31	20.7	0.326	0.238	9.26	15.35	0.016	2.48	0.211	100.89	74.71	0.0087
TB2-44D	56.4664	24.5362	Tholeiitic Alley	30	52.33	20.7	0.41	0.223	9.16	15.24	0.059	2.07	0.199	100.39	74.78	0.0111
TB2-44D	56.4664	24.5362	Tholeiitic Alley	31	52.32	21.1	0.364	0.291	8.9	15.58	0.051	1.58	0.198	100.38	75.73	0.0099
TB2-44D	56.4664	24.5362	Tholeiitic Alley	32	52.28	21.24	0.359	0.242	8.74	15.64	0.067	1.61	0.21	100.39	76.13	0.0097
TB2-44D	56.4664	24.5362	Tholeiitic Alley	33	52.64	20.71	0.237	0.215	8.77	15.77	0.026	1.94	0.189	100.5	76.22	0.0064
TB2-44D	56.4664	24.5362	Tholeiitic Alley	34	52.14	20.8	0.316	0.21	8.76	16.01	0.055	1.5	0.207	100	76.51	0.0086
TB2-44D	56.4664	24.5362	Tholeiitic Alley	35	52.83	20.65	0.24	0.205	8.82	16.16	0.04	1.67	0.199	100.81	76.56	0.0065
TB2-44D	56.4664	24.5362	Tholeiitic Alley	36	52.27	21.01	0.339	0.245	8.56	15.69	0.147	1.71	0.196	100.17	76.57	0.0092
TB2-44D	56.4664	24.5362	Tholeiitic Alley	37	52.25	20.85	0.224	0.222	8.54	15.84	0.068	2.05	0.219	100.26	76.78	0.006
TB2-44D	56.4664	24.5362	Tholeiitic Alley	38	52.57	20.81	0.206	0.153	8.49	16.03	0.062	2.04	0.215	100.58	77.09	0.0055
TB2-44D	56.4664	24.5362	Tholeiitic Alley	39	52.46	20.77	0.215	0.185	8.19	16.23	0.064	1.99	0.199	100.3	77.94	0.0058
TB2-44D	56.4664	24.5362	Tholeiitic Alley	40	52.78	21.1	0.308	0.201	8.01	16.01	0.107	1.76	0.185	100.46	78.08	0.0083
TB2-44D	56.4664	24.5362	Tholeiitic Alley	41	52.89	20.89	0.284	0.185	7.98	16.06	0.13	1.75	0.178	100.35	78.2	0.0077
TB2-44D	56.4664	24.5362	Tholeiitic Alley	42	53.21	20.78	0.183	0.208	8.04	16.24	0.082	1.56	0.201	100.5	78.26	0.0049
TB2-44D	56.4664	24.5362	Tholeiitic Alley	43	52.79	20.99	0.183	0.19	7.92	16.25	0.052	1.51	0.202	100.09	78.53	0.005
TB2-44D	56.4664	24.5362	Tholeiitic Alley	44	52.91	20.99	0.252	0.19	7.95	16.4	0.134	1.69	0.196	100.71	78.62	0.0068
TB2-44D	56.4664	24.5362	Tholeiitic Alley	45	53.21	20.87	0.194	0.159	7.89	16.47	0.066	1.47	0.193	100.52	78.82	0.0053
TB2-44D	56.4664	24.5362	Tholeiitic Alley	46	52.87	20.94	0.275	0.172	7.21	15.7	0.127	2.17	0.167	99.63	79.51	0.0074
TB2-44D	56.4664	24.5362	Tholeiitic Alley	47	52.76	21.08	0.299	0.198	7.28	15.88	0.095	2.22	0.167	99.98	79.54	0.008
TB2-44D	56.4664	24.5362	Tholeiitic Alley	48	53.19	20.93	0.294	0.256	7.15	15.78	0.085	2.22	0.196	100.1	79.73	0.0079
TB2-44D	56.4664	24.5362	Tholeiitic Alley	49	53.21	20.89	0.257	0.126	7.33	16.66	0.074	2.02	0.173	100.74	80.2	0.0069
TB2-44D	56.4664	24.5362	Tholeiitic Alley	50	53.08	20.97	0.267	0.203	7.23	16.55	0.066	2.13	0.17	100.67	80.32	0.0071
TB2-44D	56.4664	24.5362	Tholeiitic Alley	51	53.04	20.79	0.279	0.148	7.25	16.74	0.079	2.14	0.18	100.65	80.45	0.0074
TB2-44D	56.4664	24.5362	Tholeiitic Alley	52	53.01	20.88	0.256	0.157	7.19	16.63	0.089	2.04	0.207	100.46	80.48	0.0069
TB2-44D	56.4664	24.5362	Tholeiitic Alley	53	52.49	20.77	0.262	0.146	7.24	16.86	0.081	1.95	0.184	99.98	80.59	0.0071
TB2-50D	57.3803	23.6029	Tholeiitic Alley	1	53.56	18.29	0.309	0.192	7.95	17.85	0.055	2.81	0.233	101.25	80.01	0.0081
TB2-50D	57.3803	23.6029	Tholeiitic Alley	2	53.72	18.17	0.281	0.172	7.68	18.06	0.088	2.57	0.213	100.95	80.74	0.0074
TB2-50D	57.3803	23.6029	Tholeiitic Alley	3	52.74	20.63	0.425	0.256	6.94	16.44	0.121	3.34	0.18	101.07	80.85	0.0112
TB2-50D	57.3803	23.6029	Tholeiitic Alley	4	52.72	20.75	0.403	0.214	6.67	16.29	0.092	3.17	0.183	100.49	81.32	0.0107
TB2-50D	57.3803	23.6029	Tholeiitic Alley	5	53.29	20.65	0.375	0.188	6.65	16.85	0.135	2.98	0.19	101.31	81.87	0.0099
TB2-50D	57.3803	23.6029	Tholeiitic Alley	6	52.72	21.98	0.357	0.152	6.12	15.98	0.031	3.54	0.136	101.02	82.31	0.0094
TB2-50D	57.3803	23.6029	Tholeiitic Alley	7	53.46	21.65	0.328	0.193	6.18	16.49	0.024	2.84	0.168	101.33	82.63	0.0086
TB2-50D	57.3803	23.6029	Tholeiitic Alley	8	54.68	19.71	0.19	0.114	6.67	18.25	0.082	1.52	0.208	101.42	82.98	0.0051
TB2-50D	57.3803	23.6029	Tholeiitic Alley	9	53.65	21.27	0.275	0.161	6.05	16.71	0.153	3.02	0.166	101.46	83.12	0.0072
TB2-50D	57.3803	23.6029	Tholeiitic Alley	10	53.99	21.9	0.282	0.173	5.76	16.44	0.018	2.39	0.167	101.12	83.57	0.0075
TB2-50D	57.3803	23.6029	Tholeiitic Alley	11	53.51	22.02	0.273	0.123	5.73	16.48	0.017	2.33	0.169	100.65	83.68	0.0073
TB2-50D	57.3803	23.6029	Tholeiitic Alley	12	53.57	20.83	0.254	0.234	6.05	17.41	0.144	2.4	0.188	101.08	83.69	0.0067
TB2-50D	57.3803	23.6029	Tholeiitic Alley	13	53.46	22.05	0.276	0.11	5.75	16.66	0.018	2.33	0.168	100.82	83.78	0.0073
TB2-50D	57.3803	23.6029	Tholeiitic Alley	14	53.81	20.69	0.224	0.198	5.97	17.3	0.142	2.47	0.166	100.97	83.78	0.0059
TB3-19A	56.4542	24.5629	Tholeiitic Alley	1	51.78	19.57	0.352	0.19	11.25	14.44	0.005	2.08	0.249	99.92	69.59	0.0096
TB3-19A	56.4542	24.5629	Tholeiitic Alley	2	51.97	19.74	0.305	0.18	11.24	14.46	0.02	2.1	0.237	100.25	69.63	0.0083
TB3-19A	56.4542	24.5629	Tholeiitic Alley	3	51.97	19.83	0.336	0.183	11.16	14.51	0.003	2.06	0.24	100.29	69.86	0.0092
TB3-19A	56.4542	24.5629	Tholeiitic Alley	4	52.06	19.78	0.315	0.181	11.4	14.83	0.016	1.91	0.257	100.75	69.87	0.0086
TB3-19A	56.4542	24.5629	Tholeiitic Alley	5	52.1	19.94	0.342	0.179	11.07	14.45	0.025	2.08	0.223	100.41	69.94	0.0093
TB3-19A	56.4542	24.5629	Tholeiitic Alley	6	51.72	19.88	0.348	0.181	11.08	14.52	0.023	1.95	0.242	99.94	70.02	0.0095
TB3-19A	56.4542	24.5629	Tholeiitic Alley	7	52	19.83	0.353	0.156	11.14	14.6	<0.001	2	0.264	100.34	70.02	0.0096
TB3-19A	56.4542	24.5629	Tholeiitic Alley	8	52.18	19.53	0.323	0.195	11.27	14.78	0.016	2.02	0.259	100.57	70.04	0.0088
TB3-19A	56.4542	24.5629	Tholeiitic Alley	9	52.34	19.53	0.34	0.201	11.36	14.9	0.011	2.01	0.237	100.93	70.04	0.0092
TB3-19A	56.4542	24.5629	Tholeiitic Alley	10	52.13	19.92	0.351	0.165	11.15	14.72	<0.001	2.03	0.231	100.7	70.18	0.0095
TB3-19A	56.4542	24.5629	Tholeiitic Alley	11	52.31	19.7	0.32	0.168	11.2	14.79	0.011	1.98	0.238	100.72	70.18	0.0087
TB3-19A	56.4542	24.5629	Tholeiitic Alley	12	52.02	19.94	0.34	0.188	10.95	14.47	0.022	1.97	0.252	100.15	70.2	0.0093
TB3-19A	56.4542	24.5629	Tholeiitic Alley	13	51.62	19.92	0.31	0.177	10.9	14.48	0.012	2.01	0.228	99.66	70.31	0.0085
TB3-19A	56.4542	24.5629	Tholeiitic Alley	14	51.74	20.02	0.327	0.22	10.87	14.45	0.018	1.96	0.223	99.83	70.32	0.009
TB3-19A	56.4542	24.5629	Tholeiitic Alley	15	51.97	19.38	0.316	0.19	11.13	14.88	0.012	1.92	0.236	100.03	70.44	0.0086
TB3-19A	56.4542	24.5629	Tholeiitic Alley	16	52.23	19.25	0.296	0.182	11.26	15.18	0.004	1.92	0.257	100.58	70.61	0.0081
TB3-19A	56.4542	24.5629	Tholeiitic Alley	17	52.03	19.51	0.314	0.161	10.92	14.86	0.017	1.83	0.25	99.89	70.81	0.0086
TB3-19A	56.4542	24.5629	Tholeiitic Alley	18	52	19.9	0.302	0.19	10.69	14.68	0.022	1.93	0.239	99.95	71	0.0083
TB3-19A	56.4542	24.5629	Tholeiitic Alley	19	51.98	19.78	0.287	0.173	10.9	14.98	0.01	1.83	0.227	100.17	71.01	0.0078
TB3-19A	56.4542	24.5629	Tholeiitic Alley	20	52.27	19.74	0.281	0.2	10.81	15.05	0.016	1.77	0.244	100.38	71.28	0.0077
TB3-19A	56.4542	24.5629	Tholeiitic Alley	21	52.57	19.87	0.282	0.154	10.83	15.1	0.024	1.76	0.227	100.82	71.31	0.0077
TB3-19A	56.4542	24.5629	Tholeiitic Alley	22	52.5	19.75	0.294	0.182	10.76	15.03	0.02	1.8	0.245	100.58	71.35	0.008
TB3-19A	56.4542	24.5629	Tholeiitic Alley	23	52.6	19.88	0.287	0.152	10.61	15.09	0.014	1.64	0.242	100.52	71.71	0.0078
SP18-A9	56.357	24.262	Transitional Alley	1	54.39	19.36	0.172	0.123	5.25	17.67	0.228	2.06	0.132	99.39	85.71	0.0046
SP18-A9	56.357	24.262	Transitional Alley	2	54.69	20.74	0.109	0.161	3.9	17.74	0.903	1.75	0.083	100.08	89.02	0.0029
SP18-A9	56.357	24.262	Transitional Alley	3	54	21.67	0.111	0.17	3.65	16.69	1.113	2.18	0.093	99.68	89.07	0.003
SP18-A9	56.357	24.262	Transitional Alley	4	54.52	21.05	0.099	0.156	3.79	17.41	0.887	1.75	0.095	99.76	89.12	0.0026
SP18-A9	56.357	24.262	Transitional Alley	5	54.5	21.89	0.118	0.173	3.52	16.38	0.887	2.03	0.066	99.56	89.24	0.0032
SP18-A9	56.357	24.262	Transitional Alley	6	54.43	21.42	0.12	0.188	3.67	17.08	0.966	1.97	0.065	99.91	89.24	0.0032
SP18-A9	56.357	24.262	Transitional Alley	7	53.63	21.84	0.123	0.154	3.56	16.6	1.138	2.31	0.084	99.44	89.26	0.0033
SP18-A9	56.357	24.262	Transitional Alley	8	54.58	21.28	0.094	0.174	3.68	17.51	0.761	1.57	0.077	99.73	89.45	0.0025
SP18-A9	56.357	24.262	Transitional Alley	9	54.33	21.65	0.105	0.178	3.62	17.28	0.849	1.64	0.088	99.74	89.48	0.0028
SP18-A9	56.357	24.262	Transitional Alley	10	54.15	21.7	0.088	0.171	3.54	17.15	0.852	1.78	0.07	99.5	89.62	0.0024
TB2-39B	56.3597	24.6898	Transitional Geotimes-Lasail	1	50.21	20.5	0.638	0.227	8.28	15.09	0.352	4.29	0.212	99.8	76.46	0.0169
TB2-39B	56.3597	24.6898	Transitional Geotimes-Lasail	2	51.17	20.99	0.697	0.281	7.45	15.12	0.168	3.78	0.179	99.84	78.34	0.0185
TB2-39B	56.3597	24.6898	Transitional Geotimes-Lasail	3	50.94	20.93	0.533	0.21	7.62	15.6	0.229	3.69	0.19	99.94	78.49	0.0141
TB2-39B	56.3597	24.6898	Transitional Geotimes-Lasail	4	51.29	21.23	0.584	0.197	7.51	15.54	0.275	3.7	0.175	100.5	78.67	0.0154
TB2-39B	56.3597	24.6898	Transitional Geotimes-Lasail	5	50.71	21.79	0.528	0.29	7.22	15.25	0.24	3.96	0.195	100.18	79.01	0.0139
TB2-39B	56.3597	24.6898	Transitional Geotimes-Lasail	6	50.97	21.15	0.576	0.311	7.25	15.37	0.482	3.9	0.186	100.2	79.07	0.0151
TB2-39B	56.3597	24.6898	Transitional Geotimes-Lasail	7	50.67	21.65	0.542	0.211	7.15	15.18	0.407	3.75	0.178	99.74	79.1	0.0144
TB2-39B	56.3597	24.6898	Transitional Geotimes-Lasail	8	50.99	20.89	0.666	0.282	7.11	15.22	0.299	4.22	0.173	99.85	79.23	0.0175
TB2-39B	56.3597	24.6898	Transitional Geotimes-Lasail	9	50.76	20.93	0.893	0.275	6.97	14.98	0.385	4.4	0.158	99.75	79.3	0.0235
TB2-39B	56.3597	24.6898	Transitional Geotimes-Lasail	10	50.93	21.25	0.886	0.298	7.02	15.1	0.271	4.26	0.158	100.17	79.31	0.0233
TB2-39B	56.3597	24.6898	Transitional Geotimes-Lasail	11	51.12	21.67	0.606	0.264	6.92	15.36	0.316	4.05	0.186	100.49	79.82	0.0159
TB2-39B	56.3597	24.6898	Transitional Geotimes-Lasail	12	49.55	21.91	0.734	0.232	6.53	14.57	0.346	5.56	0.145	99.58	79.91	0.0191
TB2-39B	56.3597	24.6898	Transitional Geotimes-Lasail	13	51.12	21.88	0.508	0.249	6.8	15.21	0.32	4	0.181	100.27	79.95	0.0134
TB2-39B	56.3597	24.6898	Transitional Geotimes-Lasail	14	49.65	21.61	0.746	0.275	6.67	14.92	0.528	5.18	0.16	99.74	79.95	0.0194
TB2-39B	56.3597	24.6898	Transitional Geotimes-Lasail	15	51.29	20.68	0.712	0.306	6.9	15.54	0.183	3.79	0.171	99.57	80.06	0.0189
TB2-39B	56.3597	24.6898	Transitional Geotimes-Lasail	16	49.78	21.76	0.689	0.19	6.49	14.65	0.23	5.54	0.178	99.51	80.09	0.018
TB2-39B	56.3597	24.6898	Transitional Geotimes-Lasail	17	50.42	21.08	0.948	0.222	6.55	15.34	0.295	4.97	0.144	99.97	80.67	0.0247
TB2-39B	56.3597	24.6898	Transitional Geotimes-Lasail	18	50.62	21.74	0.813	0.166	6.48	15.18	0.214	4.55	0.13	99.89	80.68	0.0214
TB2-39B	56.3597	24.6898	Transitional Geotimes-Lasail	19	52.05	20.86	0.388	0.188	6.93	16.33	0.304	3.04	0.206	100.3	80.77	0.0103
TB2-39B	56.3597	24.6898	Transitional Geotimes-Lasail	20	51.02	22.4	0.475	0.225	6.36	15.07	0.255	4.23	0.159	100.19	80.86	0.0125
TB2-39B	56.3597	24.6898	Transitional Geotimes-Lasail	21	49.98	20.75	0.889	0.232	6.43	15.27	0.21	5.26	0.151	99.17	80.89	0.0233
TB2-39B	56.3597	24.6898	Transitional Geotimes-Lasail	22	52.26	21.09	0.501	0.146	6.7	15.99	0.15	2.84	0.184	99.86	80.97	0.0134
TB2-39B	56.3597	24.6898	Transitional Geotimes-Lasail	23	51.83	21.71	0.388	0.218	6.73	16.15	0.292	3.19	0.194	100.7	81.05	0.0102
TB2-39B	56.3597	24.6898	Transitional Geotimes-Lasail	24	51.45	20.5	0.549	0.189	6.7	16.12	0.336	4.35	0.148	100.34	81.09	0.0143
TB2-39B	56.3597	24.6898	Transitional Geotimes-Lasail	25	50.84	20.52	0.778	0.299	6.61	15.94	0.307	4.88	0.168	100.34	81.13	0.0202
TB2-39B	56.3597	24.6898	Transitional Geotimes-Lasail	26	52.47	21.11	0.53	0.284	6.57	15.94	0.1	2.76	0.165	99.93	81.22	0.0142
TB2-39B	56.3597	24.6898	Transitional Geotimes-Lasail	27	51.14	21.15	0.612	0.256	6.37	15.62	0.238	4.78	0.156	100.32	81.38	0.0159
TB2-39B	56.3597	24.6898	Transitional Geotimes-Lasail	28	51.19	21.8	0.631	0.182	6.12	15.26	0.304	4.51	0.131	100.13	81.63	0.0165
TB2-39B	56.3597	24.6898	Transitional Geotimes-Lasail	29	53.25	20.59	0.407	0.182	6.65	16.84	0.12	1.97	0.185	100.19	81.86	0.0109
TB2-39B	56.3597	24.6898	Transitional Geotimes-Lasail	30	52.02	21.89	0.667	0.233	6.14	15.57	0.046	3.26	0.14	99.97	81.88	0.0177
TB2-39B	56.3597	24.6898	Transitional Geotimes-Lasail	31	53.03	21.26	0.31	0.144	6.6	16.92	0.257	1.9	0.185	100.61	82.05	0.0083
TB2-39B	56.3597	24.6898	Transitional Geotimes-Lasail	32	51.39	22.01	0.545	0.202	6.09	15.74	0.163	4.29	0.154	100.58	82.16	0.0142
TB2-39B	56.3597	24.6898	Transitional Geotimes-Lasail	33	50.79	21.81	0.812	0.233	5.98	15.49	0.409	4.71	0.142	100.38	82.2	0.0211
TB2-39B	56.3597	24.6898	Transitional Geotimes-Lasail	34	53.19	20.35	0.333	0.246	6.31	17.21	0.198	2.38	0.21	100.43	82.94	0.0088
TB2-39B	56.3597	24.6898	Transitional Geotimes-Lasail	35	50.66	20.31	0.664	0.185	5.89	16.19	0.448	5.05	0.145	99.54	83.05	0.0173
TB2-39B	56.3597	24.6898	Transitional Geotimes-Lasail	36	53.3	19.34	0.385	0.153	6.46	18.16	0.189	1.84	0.191	100.02	83.36	0.0103
TB2-39B	56.3597	24.6898	Transitional Geotimes-Lasail	37	53.47	21.48	0.362	0.154	5.49	16.86	0.239	2.22	0.142	100.42	84.55	0.0096
TB2-39B	56.3597	24.6898	Transitional Geotimes-Lasail	38	53.11	21.78	0.368	0.15	5.4	16.78	0.236	2.26	0.131	100.22	84.71	0.0098
YV15-14	56.3671	24.7514	Transitional Geotimes-Lasail	1	51.12	19.65	0.947	0.424	6.52	15.73	0.484	5.07	N.M.	99.95	81.13	0.0245
YV15-14	56.3671	24.7514	Transitional Geotimes-Lasail	2	51.2	19.54	0.885	0.238	6.27	16	0.348	5.54	N.M.	100.02	81.98	0.0229
YV15-14	56.3671	24.7514	Transitional Geotimes-Lasail	3	52.05	19.91	0.809	0.264	6.16	15.91	0.414	5.08	N.M.	100.6	82.15	0.0209
YV15-14	56.3671	24.7514	Transitional Geotimes-Lasail	4	51.83	19.84	0.8	0.216	6.17	16.34	0.347	5.45	N.M.	100.99	82.52	0.0205
YV15-14	56.3671	24.7514	Transitional Geotimes-Lasail	5	51.34	20.19	0.974	0.196	5.89	15.92	0.332	5.83	N.M.	100.67	82.81	0.0249
YV15-14	56.3671	24.7514	Transitional Geotimes-Lasail	6	51.42	21.78	0.966	0.19	5.55	15.08	0.474	5.29	N.M.	100.75	82.89	0.0249
YV15-14	56.3671	24.7514	Transitional Geotimes-Lasail	7	51.7	21.05	0.913	0.204	5.76	15.68	0.404	5.09	N.M.	100.8	82.91	0.0236
YV15-14	56.3671	24.7514	Transitional Geotimes-Lasail	8	52.13	19.82	0.756	0.188	6.05	16.58	0.368	4.83	N.M.	100.72	83.01	0.0195
YV15-14	56.3671	24.7514	Transitional Geotimes-Lasail	9	51.3	21.59	0.909	0.197	5.44	15.15	0.352	4.83	N.M.	99.77	83.23	0.0238
YV15-14	56.3671	24.7514	Transitional Geotimes-Lasail	10	51.66	19.46	0.901	0.173	5.75	16.12	0.563	5.74	N.M.	100.37	83.33	0.0231
YV15-14	56.3671	24.7514	Transitional Geotimes-Lasail	11	52.52	21.47	0.719	0.207	5.5	15.44	0.497	4.25	N.M.	100.6	83.34	0.0188
YV15-14	56.3671	24.7514	Transitional Geotimes-Lasail	12	51.99	21.07	0.63	0.37	5.33	15.02	1.005	4.31	N.M.	99.73	83.4	0.0165
YV15-14	56.3671	24.7514	Transitional Geotimes-Lasail	13	51.7	20.5	0.806	0.172	5.44	15.57	0.635	4.85	N.M.	99.67	83.61	0.0211
YV15-14	56.3671	24.7514	Transitional Geotimes-Lasail	14	52	21.24	0.78	0.205	5.38	15.68	0.731	4.95	N.M.	100.97	83.86	0.0201
YV15-14	56.3671	24.7514	Transitional Geotimes-Lasail	15	51.92	21.19	0.789	0.247	5.26	15.41	0.846	4.79	N.M.	100.45	83.93	0.0204
YV15-14	56.3671	24.7514	Transitional Geotimes-Lasail	16	52	21.38	0.827	0.197	5.3	15.57	0.611	5.1	N.M.	100.99	83.97	0.0213
YV15-14	56.3671	24.7514	Transitional Geotimes-Lasail	17	51.9	21.18	0.918	0.196	5.3	15.75	0.676	4.93	N.M.	100.85	84.12	0.0237
YV15-14	56.3671	24.7514	Transitional Geotimes-Lasail	18	52.45	20.14	0.521	0.282	5.46	16.29	0.819	4.18	N.M.	100.14	84.17	0.0136
YV15-14	56.3671	24.7514	Transitional Geotimes-Lasail	19	51.56	21.02	0.776	0.29	5.22	15.65	1.064	4.81	N.M.	100.39	84.24	0.02
YV15-14	56.3671	24.7514	Transitional Geotimes-Lasail	20	51.26	20.73	0.791	0.167	5.25	15.74	0.996	4.67	N.M.	99.6	84.24	0.0207
YV15-14	56.3671	24.7514	Transitional Geotimes-Lasail	21	51.43	21.28	0.933	0.24	5.06	15.4	0.929	5.31	N.M.	100.58	84.44	0.024
YV15-14	56.3671	24.7514	Transitional Geotimes-Lasail	22	52.84	21.52	0.683	0.194	5.01	15.35	0.908	4.36	N.M.	100.87	84.52	0.0177
YV15-14	56.3671	24.7514	Transitional Geotimes-Lasail	23	51.85	20.26	0.819	0.198	5.28	16.2	0.924	5.08	N.M.	100.61	84.54	0.0211
YV15-14	56.3671	24.7514	Transitional Geotimes-Lasail	24	51.36	20.22	0.479	0.235	5.34	16.41	1.028	3.97	N.M.	99.04	84.56	0.0126
YV15-14	56.3671	24.7514	Transitional Geotimes-Lasail	25	52.06	21.08	0.78	0.186	5.18	15.97	0.641	4.99	N.M.	100.89	84.6	0.0201
YV15-14	56.3671	24.7514	Transitional Geotimes-Lasail	26	52.76	20.87	0.659	0.192	5.17	16.02	0.716	4.48	N.M.	100.87	84.67	0.017
YV15-14	56.3671	24.7514	Transitional Geotimes-Lasail	27	52.88	20.7	0.617	0.201	5.17	16.05	0.9	4.48	N.M.	101	84.69	0.0159
YV15-14	56.3671	24.7514	Transitional Geotimes-Lasail	28	52.28	20.25	0.538	0.223	5.2	16.27	0.803	4.16	N.M.	99.72	84.8	0.0141
YV15-14	56.3671	24.7514	Transitional Geotimes-Lasail	29	52.25	20.55	0.629	0.186	5.21	16.33	0.992	4.18	N.M.	100.33	84.82	0.0164
YV15-14	56.3671	24.7514	Transitional Geotimes-Lasail	30	52.83	20.28	0.517	0.193	5.3	16.62	0.875	4.16	N.M.	100.78	84.82	0.0134
YV15-14	56.3671	24.7514	Transitional Geotimes-Lasail	31	52.13	20.51	0.716	0.208	5.16	16.26	0.982	4.64	N.M.	100.61	84.89	0.0185
YV15-14	56.3671	24.7514	Transitional Geotimes-Lasail	32	53.05	21.68	0.508	0.191	4.97	15.7	0.808	4.11	N.M.	101.02	84.92	0.0132
YV15-14	56.3671	24.7514	Transitional Geotimes-Lasail	33	52.84	20.83	0.639	0.266	5.08	16.07	0.84	4.48	N.M.	101.05	84.94	0.0165
YV15-14	56.3671	24.7514	Transitional Geotimes-Lasail	34	52.67	21.39	0.527	0.254	5.1	16.14	0.723	3.73	N.M.	100.53	84.94	0.0138
YV15-14	56.3671	24.7514	Transitional Geotimes-Lasail	35	52.92	20.67	0.557	0.221	5.14	16.28	0.903	4.11	N.M.	100.8	84.95	0.0144
YV15-14	56.3671	24.7514	Transitional Geotimes-Lasail	36	52.09	21.48	0.722	0.256	4.96	15.73	0.948	4.62	N.M.	100.81	84.97	0.0186
YV15-14	56.3671	24.7514	Transitional Geotimes-Lasail	37	53.01	20.77	0.592	0.203	5.11	16.25	0.741	4.26	N.M.	100.94	85	0.0153
YV15-14	56.3671	24.7514	Transitional Geotimes-Lasail	38	53.23	21.14	0.487	0.212	5.04	16.09	0.79	4.03	N.M.	101.02	85.05	0.0126
YV15-14	56.3671	24.7514	Transitional Geotimes-Lasail	39	52.48	21.68	0.634	0.179	4.92	15.91	0.96	4.18	N.M.	100.94	85.22	0.0164
YV15-14	56.3671	24.7514	Transitional Geotimes-Lasail	40	52.69	21.96	0.573	0.202	4.75	15.46	0.763	4.5	N.M.	100.9	85.3	0.0148
YV15-14	56.3671	24.7514	Transitional Geotimes-Lasail	41	52.34	21.5	0.586	0.228	4.94	16.11	0.815	4.11	N.M.	100.63	85.32	0.0152
YV15-14	56.3671	24.7514	Transitional Geotimes-Lasail	42	53.4	20.87	0.505	0.235	5.01	16.38	0.73	3.82	N.M.	100.95	85.35	0.0131
YV15-14	56.3671	24.7514	Transitional Geotimes-Lasail	43	52.76	21.63	0.529	0.199	4.78	15.65	0.809	4.35	N.M.	100.71	85.37	0.0137
YV15-14	56.3671	24.7514	Transitional Geotimes-Lasail	44	51.87	19.6	0.574	0.217	5.19	17.04	1.142	4.22	N.M.	99.85	85.41	0.0149
YV15-14	56.3671	24.7514	Transitional Geotimes-Lasail	45	52.84	21.27	0.514	0.205	4.9	16.19	0.795	3.93	N.M.	100.64	85.48	0.0134
YV15-14	56.3671	24.7514	Transitional Geotimes-Lasail	46	52.98	21.24	0.53	0.222	4.67	15.89	1.162	4.08	N.M.	100.77	85.85	0.0137
YV15-14	56.3671	24.7514	Transitional Geotimes-Lasail	47	52.83	20.56	0.517	0.192	4.88	16.63	1.007	4.13	N.M.	100.75	85.86	0.0134
YV15-14	56.3671	24.7514	Transitional Geotimes-Lasail	48	52.99	21.08	0.444	0.19	4.7	16.34	1.13	3.88	N.M.	100.75	86.11	0.0115
YV15-14	56.3671	24.7514	Transitional Geotimes-Lasail	49	52.78	21.27	0.573	0.235	4.57	15.95	1.099	4.31	N.M.	100.79	86.15	0.0148
YV15-14	56.3671	24.7514	Transitional Geotimes-Lasail	50	52.73	21.57	0.509	0.213	4.49	15.68	1.271	4.2	N.M.	100.66	86.16	0.0132
YV15-14	56.3671	24.7514	Transitional Geotimes-Lasail	51	52.74	21.17	0.574	0.212	4.55	15.89	1.154	4.34	N.M.	100.63	86.16	0.0149
YV15-14	56.3671	24.7514	Transitional Geotimes-Lasail	52	52.44	21.51	0.554	0.217	4.55	15.95	1.257	4.39	N.M.	100.87	86.2	0.0143
YV15-14	56.3671	24.7514	Transitional Geotimes-Lasail	53	53.22	20.67	0.484	0.139	4.68	16.57	0.939	4.07	N.M.	100.77	86.32	0.0125
YV15-14	56.3671	24.7514	Transitional Geotimes-Lasail	54	53.43	21.17	0.458	0.267	4.49	16.32	1.066	3.83	N.M.	101.03	86.63	0.0118
YV15-14	56.3671	24.7514	Transitional Geotimes-Lasail	55	53.39	21.18	0.422	0.194	4.48	16.41	1.058	3.68	N.M.	100.81	86.72	0.011
YV15-14	56.3671	24.7514	Transitional Geotimes-Lasail	56	53.25	21.56	0.432	0.217	4.35	16.04	1.31	3.8	N.M.	100.96	86.79	0.0112

## Sheet: Magnon_Magnetic susceptibility_
Sample	Longitude [˚E]	Latitude [˚N]	UTM 40 N mE	UTM 40 N mN	Original documentation	Unit assignment criteria	Lava Unit	Instrument	Magnetic Susceptibility Magnon	NRM	Koenigsberger ratio
									m3/kg	Am2/kg	unitless
TB2-21A	56.3181	24.8075	431083	2743804	This Study	Geochemistry	Boninitic Alley	Magnon	1.62e-07	4.78e-06	0.97
AB16-4550	56.453	24.5648	444614	2716871	This Study	Geochemistry	Boninitic Alley	Magnon	1.66e-07	0.000241	48
TB2-44A	56.4615	24.5576	445466	2716071	This Study	Geochemistry	Boninitic Alley	Magnon	1.85e-07	8.04e-06	1.43
TB2-42C	56.3727	24.5351	436458	2713614	This Study	Geochemistry	Boninitic Alley	Magnon	1.95e-07	7.44e-06	1.26
LD10-1221	56.4548	24.5631	444791	2716677	This Study	Geochemistry	Lasail	Magnon	3.75e-07	0.00017	14.96
TB2-40b	56.3616	24.6915	435423	2730938	This Study	Geochemistry	Geotimes	Magnon	1.23e-06	0.00128	34.4
TB2-34A	56.4299	24.2817	442141	2685531	This Study	Geochemistry	Felsic Alley	Magnon	2.02e-06	0.000701	11.43
TB2-40D	56.3809	24.6885	437369	2730600	This Study	Geochemistry	Depleted Lasailsail	Magnon	3.04e-06	0.00113	12.27
TB2-31B	56.4336	24.2725	442510	2684512	This Study	Geochemistry	Tholeiitic Alley	Magnon	4.62e-06	0.000291	2.08
TB2-31C	56.4321	24.2722	442363	2684476	This Study	Geochemistry	Tholeiitic Alley	Magnon	8.12e-06	0.000307	1.24
AB16-4602	56.458	24.6151	445141	2722434	This Study	Geochemistry	Lasail	Magnon	8.71e-06	0.000301	1.14
TB2-31A	56.435	24.2728	442656	2684546	This Study	Geochemistry	Tholeiitic Alley	Magnon	1.19e-05	0.0018	4.96
AB16-4583	56.3097	24.8075	430229	2743811	This Study	Geochemistry	Geotimes	Magnon	1.41e-05	N.M.	N.M.
AB16-4492	56.3435	24.8728	433688	2751018	This Study	Geochemistry	Geotimes	Magnon	1.54e-05	0.000299	0.64
TB2-38B	56.3683	24.742	436118	2736530	This Study	Geochemistry	Tholeiitic Alley	Magnon	1.58e-05	0.000511	1.07
TB2-34D	56.4635	24.3189	445562	2689636	This Study	Geochemistry	Tholeiitic Alley	Magnon	2.04e-05	0.000604	0.98
TB2-33D	56.4303	24.2782	442181	2685150	This Study	Geochemistry	Tholeiitic Alley	Magnon	2.14e-05	0.000287	0.44
TB2-50C	57.3809	23.5996	538861	2609945	This Study	Geochemistry	Felsic Geotimes	Magnon	2.32e-05	0.000999	1.42
AB16-4483	56.3725	24.501	436420	2709845	This Study	Geochemistry	Geotimes	Magnon	2.59e-05	0.00313	3.99
TB2-41A	56.3837	24.6881	437655	2730556	This Study	Geochemistry	Tholeiitic Alley	Magnon	2.94e-05	0.00178	2
TB2-33C	56.4303	24.2782	442181	2685150	This Study	Geochemistry	Tholeiitic Alley	Magnon	3.14e-05	N.M.	N.M.
AB16-4472	56.3748	24.5019	436654	2709934	This Study	Geochemistry	Geotimes	Magnon	3.78e-05	0.00092	0.8
TB3-15C	56.5537	24.1448	454652	2670328	This Study	Geochemistry	Transitional Alley	Magnon	9.64e-08	3.12e-05	10.66
TB3-19C	56.4539	24.5757	444704	2718077	This Study	Geochemistry	Boninitic Alley	Magnon	1.53e-07	1.3e-06	0.28
TB3M4B	56.3699	24.5475	436185	2714992	This Study	Stratigraphy	Boninitic Alley	Magnon	1.94e-07	0.000326	49.17
TB3-23B	56.3812	24.5952	437349	2720265	This Study	Geochemistry	Boninitic Alley	Magnon	1.96e-07	8.02e-08	0.01
TB3M4C	56.3699	24.5475	436185	2714990	This Study	Stratigraphy	Boninitic Alley	Magnon	2.08e-07	0.000215	30.32
TB3-03D	56.3163	24.8276	430912	2746032	This Study	Geochemistry	Tholeiitic Alley	Magnon	2.14e-07	0.00018	27.73
TB2-42B	56.3727	24.5351	436458	2713614	This Study	Geochemistry	Boninitic Alley	Magnon	2.7e-07	1.61e-05	1.97
TB3-15L	56.5365	24.0412	452868	2658866	This Study	Geochemistry	Lasail	Magnon	2.79e-07	N.M.	N.M.
TB3-17L	56.8891	23.8289	488706	2635293	This Study	Geochemistry	Lasail	Magnon	2.85e-07	1.74e-06	0.2
TB3-03A	56.329	24.786	432175	2741416	This Study	Geochemistry	Boninitic Alley	Magnon	9.27e-07	5.21e-05	1.85
TB3-20I	56.3556	24.8591	434896	2749504	This Study	Geochemistry	Geotimes	Magnon	1.42e-06	9.49e-05	2.2
YV15-26	56.3735	24.5106	436532	2710903	This Study	Geochemistry	Lasail	Magnon	1.97e-06	0.000321	5.37
TB2-38A	56.3859	24.7485	437904	2737235	This Study	Geochemistry	Lasail	Magnon	4.03e-06	0.000238	1.95
TB3-25G	56.5844	23.6648	457621	2617174	This Study	Geochemistry	Tholeiitic Alley	Magnon	4.05e-06	0.00168	13.72
TB3-20D	56.335	24.8255	432798	2745793	This Study	Geochemistry	Geotimes	Magnon	5.12e-06	0.000294	1.89
TB3-14E	56.543	24.2367	453607	2680512	This Study	Geochemistry	Tholeiitic Alley	Magnon	6.3e-06	0.00141	7.4
TB3M3B	56.3605	24.5489	435238	2715148	This Study	Stratigraphy	Tholeiitic Alley	Magnon	6.4e-06	0.00322	14.72
TB3-09B	56.3594	24.7262	435214	2734781	This Study	Geochemistry	Lasail	Magnon	8.54e-06	0.00125	4.84
TB3M3C	56.3605	24.5489	435238	2715148	This Study	Stratigraphy	Tholeiitic Alley	Magnon	8.97e-06	0.00165	5.4
TB3M1A	56.3447	24.5544	433641	2715764	This Study	Stratigraphy	Geotimes	Magnon	9.36e-06	0.00163	5.09
TB3M1B	56.3447	24.5544	433641	2715764	This Study	Stratigraphy	Geotimes	Magnon	9.93e-06	0.00222	6.54
TB3-14C	56.5319	24.2253	452475	2679254	This Study	Geochemistry	Tholeiitic Alley	Magnon	1.01e-05	0.00114	3.69
TB3M3A	56.3605	24.5489	435238	2715148	This Study	Stratigraphy	Tholeiitic Alley	Magnon	1.14e-05	0.00266	6.83
TB3-25A	57.2491	23.6469	525400	2615154	This Study	Geochemistry	Felsic Alley	Magnon	1.24e-05	0.000264	0.7
TB3-14F	56.5492	24.193	454222	2675666	This Study	Geochemistry	Tholeiitic Alley	Magnon	1.4e-05	0.000514	1.21
TB3M2C	56.3556	24.5521	434740	2715506	This Study	Stratigraphy	Geotimes	Magnon	1.52e-05	0.00278	5.37
TB3M2B	56.3555	24.5521	434734	2715505	This Study	Stratigraphy	Geotimes	Magnon	1.53e-05	0.00202	3.88
TB3-25E	56.5302	23.6837	452101	2619290	This Study	Geochemistry	Felsic Alley	Magnon	1.54e-05	0.00171	3.66
TB3-25C	57.261	23.6426	526623	2614687	This Study	Geochemistry	Felsic Alley	Magnon	1.6e-05	0.000474	0.98
AB16-45842	56.3097	24.8075	430229	2743811	Gilgen et al. (2016)	Geochemistry	Geotimes	Magnon	1.633e-05	0.000964	1.95
TB3-07C	56.3306	24.7515	432314	2737598	Belgrano & Diamond (2019)	Geochemistry	Geotimes	Magnon	1.8e-05	0.00151	2.76
TB3M2A	56.3553	24.552	434705	2715500	This Study	Stratigraphy	Geotimes	Magnon	2.22e-05	0.00196	2.58
TB3-20C	56.3475	24.8144	434061	2744557	This Study	Geochemistry	Geotimes	Magnon	2.4e-05	0.000592	0.81
TB3M6D	56.5229	24.2104	451548	2677603	This Study	Stratigraphy	Geotimes	Magnon	2.61e-05	0.000279	0.31
TB3-26A	56.4844	23.6748	447428	2618314	This Study	Geochemistry	Geotimes	Magnon	2.93e-05	0.00142	1.6
TB3M8A	56.5054	24.1288	449740	2668573	This Study	Stratigraphy	Geotimes	Magnon	3.22e-05	0.00148	1.35
TB3M8D	56.5225	24.1253	451478	2668186	This Study	Geochemistry	Geotimes	Magnon	3.61e-05	0.000367	0.3

## Sheet: KT5 Magnetic susceptibility
Sample	Longitude [˚E]	Latitude [˚N]	UTM 40 N mE	UTM 40 N mN	Original documentation	Unit assignment criteria	Lava Unit	Magnetic Susceptibility KT-5	Magnetic Susceptibility KT-5
								10-3 SI	m3/kg
TB4-05D	56.3733	24.5824	436548	2718853	This Study	Geochemistry	Boninitic Alley	0.26	1.22e-07
TB2-21A	56.3181	24.8075	431083	2743804	This Study	Geochemistry	Boninitic Alley	0.41	1.93e-07
LD10-1211	56.4509	24.5603	444397	2716369	This Study	Geochemistry	Lasail	0.41	1.93e-07
AB16-4550	56.453	24.5648	444614	2716871	This Study	Geochemistry	Boninitic Alley	0.42	1.97e-07
TB2-44A	56.4615	24.5576	445466	2716071	This Study	Geochemistry	Boninitic Alley	0.52	2.44e-07
LD10-1221	56.4548	24.5631	444791	2716677	This Study	Geochemistry	Lasail	0.66	3.1e-07
TB2-42C	56.3727	24.5351	436458	2713614	This Study	Geochemistry	Boninitic Alley	0.72	3.38e-07
TB2-42A	56.365	24.5384	435688	2713985	This Study	Geochemistry	Boninitic Alley	0.72	3.38e-07
YV15-13	56.3687	24.75	436168	2737412	This Study	Geochemistry	Tholeiitic Alley	0.81	3.8e-07
TB2-32C	56.4388	24.263	443036	2683457	This Study	Geochemistry	Tholeiitic Alley	0.96	4.51e-07
AB16-4601	56.4433	24.6343	443655	2724573	This Study	Geochemistry	Lasail	1.04	4.88e-07
SG14-202	56.3971	24.4161	438875	2700434	Gilgen et al. (2016)	Geochemistry	Lasail	1.08	5.6e-07
TB2-40b	56.3616	24.6915	435423	2730938	This Study	Geochemistry	Geotimes	1.75	8.22e-07
Mahab 4 HW1	56.6936	24.018	468838	2656250	Gilgen et al. (2014)	Geochemistry	Lasail	2.33	1.19e-06
TB2-39A	56.3642	24.6884	435684	2730593	This Study	Geochemistry	Lasail	2.59	1.22e-06
TB4-23C	56.5336	24.0159	452564	2656061	This Study	Geochemistry	Felsic Geotimes	3.46	1.62e-06
TB2-39B	56.3597	24.6898	435225	2730754	This Study	Geochemistry	Transitional Geotimes-Lasail	3.77	1.77e-06
TB2-33A	56.4249	24.2596	441623	2683093	This Study	Geochemistry	Lasail	3.88	1.82e-06
LD10-1204	56.4495	24.5566	444247	2715959	This Study	Geochemistry	Geotimes	4.76	2.23e-06
AB16-4512	56.3332	24.8373	432620	2747096	This Study	Geochemistry	Geotimes	4.94	2.32e-06
TB2-34A	56.4299	24.2817	442141	2685531	This Study	Geochemistry	Felsic Alley	5	2.35e-06
TB2-40D	56.3809	24.6885	437369	2730600	This Study	Geochemistry	Depleted Lasailsail	6.34	2.98e-06
TB2-40A	56.3617	24.6933	435425	2731137	This Study	Geochemistry	Transitional Geotimes-Lasail	8.93	4.19e-06
TB2-32B	56.444	24.274	443564	2684676	This Study	Geochemistry	Geotimes	10	4.69e-06
YV15-14	56.3671	24.7514	436006	2737565	This Study	Geochemistry	Transitional Geotimes-Lasail	11	5.16e-06
TB2-31B	56.4336	24.2725	442510	2684512	This Study	Geochemistry	Tholeiitic Alley	11.3	5.3e-06
TB2-45B	56.496	24.5294	448953	2712934	This Study	Geochemistry	Boninitic Alley	11.3	5.3e-06
AB16-4571	56.3248	24.7864	431745	2741460	This Study	Geochemistry	Geotimes	12.6	5.92e-06
AB16-4613	56.4252	24.6281	441821	2723886	This Study	Geochemistry	Boninitic Alley	14.9	6.99e-06
TB2-39C	56.3584	24.6901	435093	2730784	This Study	Geochemistry	Geotimes	14.9	6.99e-06
TB2-35B	56.3772	24.6733	436987	2728911	This Study	Geochemistry	Tholeiitic Alley	14.9	6.99e-06
AB16-4611	56.4353	24.6081	442838	2721670	This Study	Geochemistry	Tholeiitic Alley	15	7.04e-06
AB16-4602	56.458	24.6151	445141	2722434	This Study	Geochemistry	Lasail	15.9	7.46e-06
TB2-31C	56.4321	24.2722	442363	2684476	This Study	Geochemistry	Tholeiitic Alley	16.8	7.89e-06
TB4-06B	56.4411	24.275	443271	2684787	This Study	Geochemistry	Felsic Geotimes	21.6	1.01e-05
AB16-4592	56.3121	24.8203	430479	2745220	This Study	Geochemistry	Geotimes	21.9	1.03e-05
AB16-4511	56.3317	24.8376	432475	2747135	This Study	Geochemistry	Geotimes	22.2	1.04e-05
TB4-17B	56.4162	24.2723	440745	2684504	This Study	Geochemistry	Tholeiitic Alley	22.8	1.07e-05
TB4-17J	56.3543	24.2619	434460	2683370	This Study	Geochemistry	Tholeiitic Alley	23.6	1.11e-05
AB16-4521	56.3564	24.8357	434963	2746911	This Study	Geochemistry	Geotimes	24	1.13e-05
TB4-20C	56.4933	23.7072	448346	2621897	This Study	Geochemistry	Geotimes	24.5	1.15e-05
TB2-41C	56.3662	24.5749	435825	2718026	This Study	Geochemistry	Tholeiitic Alley	24.8	1.16e-05
Zuha HW1	56.5311	24.1936	452374	2675737	Gilgen et al. (2014)	Geochemistry	Tholeiitic Alley	25.7	1.29e-05
TB2-31A	56.435	24.2728	442656	2684546	This Study	Geochemistry	Tholeiitic Alley	25.9	1.22e-05
TB2-35A	56.5023	24.3693	449528	2695209	This Study	Geochemistry	Tholeiitic Alley	27.2	1.28e-05
TB2-35D	56.3713	24.6718	436387	2728751	This Study	Geochemistry	Tholeiitic Alley	27.3	1.28e-05
TB2-50d	57.3803	23.6029	538797	2610320	This Study	Geochemistry	Tholeiitic Alley	27.8	1.31e-05
AB16-4492	56.3435	24.8728	433688	2751018	This Study	Geochemistry	Geotimes	29.9	1.4e-05
TB2-33b	56.4502	24.2521	444186	2682245	This Study	Geochemistry	Tholeiitic Alley	29.9	1.4e-05
TB2-32A	56.4392	24.2755	443086	2684841	This Study	Geochemistry	Felsic Alley	31.2	1.47e-05
Mahab 4 FW1	56.6927	24.0172	468745	2656161	Gilgen et al. (2014)	Geochemistry	Felsic Geotimes	31.5	1.58e-05
AB16-4593	56.3135	24.8104	430615	2744125	This Study	Geochemistry	Geotimes	33.1	1.55e-05
AB16-4583	56.3097	24.8075	430229	2743811	This Study	Geochemistry	Geotimes	34.4	1.62e-05
Ghuzayn 1 FW1	56.989	23.8239	498884	2634728	Gilgen et al. (2014)	Geochemistry	Felsic Geotimes	34.6	1.73e-05
TB2-38B	56.3683	24.742	436118	2736530	This Study	Geochemistry	Tholeiitic Alley	36.8	1.73e-05
TB2-50C	57.3809	23.5996	538861	2609945	This Study	Geochemistry	Felsic Geotimes	40.3	1.89e-05
TB2-34D	56.4635	24.3189	445562	2689636	This Study	Geochemistry	Tholeiitic Alley	41.7	1.96e-05
TB4-06C	56.4385	24.2765	443007	2684954	This Study	Geochemistry	Geotimes	42.1	1.98e-05
AB16-4671	56.3799	24.4707	437162	2706482	This Study	Geochemistry	Geotimes	43.1	2.02e-05
TB4-18B	56.3259	24.8953	431921	2753519	This Study	Geochemistry	Geotimes	43.3	2.03e-05
TB2-45C	56.3822	24.6882	437505	2730561	This Study	Geochemistry	Geotimes	44.8	2.1e-05
SG13-29A2	56.3299	24.7696	432254	2.7396e+06	Gilgen et al. (2016)	Geochemistry	Geotimes	45.3	2.27e-05
TB2-33D	56.4303	24.2782	442181	2685150	This Study	Geochemistry	Tholeiitic Alley	46.7	2.19e-05
TB4-15B	56.8781	23.8589	487587	2638606	This Study	Geochemistry	Geotimes	47	2.21e-05
TB4-20N	56.6248	23.6216	461728	2612384	This Study	Geochemistry	Geotimes	49.5	2.32e-05
TB2-46A	56.3721	24.647	436456	2726010	This Study	Geochemistry	Tholeiitic Alley	56	2.63e-05
TB2-33C	56.4303	24.2782	442181	2685150	This Study	Geochemistry	Tholeiitic Alley	57.9	2.72e-05
Hatta main HW1	56.3349	24.775	432766	2740199	Gilgen et al. (2014)	Geochemistry	Geotimes	58	2.9e-05
TB2-41A	56.3837	24.6881	437655	2730556	This Study	Geochemistry	Tholeiitic Alley	59.6	2.8e-05
AB16-4483	56.3725	24.501	436420	2709845	This Study	Geochemistry	Geotimes	65.1	3.06e-05
AB16-4472	56.3748	24.5019	436654	2709934	This Study	Geochemistry	Geotimes	76.7	3.6e-05
LD10-1241	56.3856	24.4577	437732	2705045	This Study	Geochemistry	Geotimes	81.3	3.82e-05
LD10-1231	56.3741	24.4705	436576	2706457	This Study	Geochemistry	Geotimes	104	4.88e-05
